# Supplementary material for: Analytical study of the annular flow of a generalised Phan-Thien–Tanner fluid
Source: Springer Nature journal article supplement (doi:10.1007/s00707-023-03784-z), 2023-12-07
Supplement: MOESM1 [file 26505642]

(* Content-type: application/vnd.wolfram.mathematica *)

(*** Wolfram Notebook File ***)
(* http://www.wolfram.com/nb *)

(* CreatedBy='Mathematica 9.0' *)

(*CacheID: 234*)
(* Internal cache information:
NotebookFileLineBreakTest
NotebookFileLineBreakTest
NotebookDataPosition[       157,          7]
NotebookDataLength[    220929,       4729]
NotebookOptionsPosition[    202718,       4505]
NotebookOutlinePosition[    203153,       4522]
CellTagsIndexPosition[    203110,       4519]
WindowFrame->Normal*)

(* Beginning of Notebook Content *)
Notebook[{
Cell[BoxData[
 RowBox[{"\[IndentingNewLine]", 
  RowBox[{
   RowBox[{
   "C\[AAcute]lculo", " ", "do", " ", "\"\<b\>\"", " ", "quando", " ", "a", 
    " ", "press\[ATilde]o", " ", "\[EAcute]", " ", "imposta"}], 
   "\[IndentingNewLine]"}]}]], "Input",
 CellChangeTimes->{{3.81158959244633*^9, 3.811589601472954*^9}, {
  3.863164424343088*^9, 3.8631644370312166`*^9}},
 Background->RGBColor[
  0.87, 0.94, 1],ExpressionUUID->"18f9a11e-2a18-4284-857c-1c436db9b83e"],

Cell[CellGroupData[{

Cell[BoxData[{
 RowBox[{
  RowBox[{"Clear", "[", "\"\<Global`*\>\"", "]"}], 
  ";"}], "\[IndentingNewLine]", 
 RowBox[{
  RowBox[{
   RowBox[{"\[Alpha]", "=", "1"}], ";", 
   RowBox[{"\[Beta]", "=", "3"}], ";", 
   RowBox[{"\[Lambda]", "=", "1"}], ";", 
   RowBox[{"\[Eta]", "=", "1"}], ";", 
   RowBox[{"\[CurlyEpsilon]", "=", 
    RowBox[{"5", "/", "100"}]}], ";", 
   RowBox[{"Wi", "=", 
    RowBox[{"Sqrt", "[", "20", "]"}]}], ";", 
   RowBox[{"a", "=", 
    RowBox[{"1", "/", "2"}]}], ";", 
   RowBox[{"RR", "=", 
    RowBox[{"1", "/", 
     RowBox[{"(", 
      RowBox[{"1", "-", "a"}], ")"}]}]}], ";", 
   RowBox[{"Pz", "=", "1"}], ";"}], 
  RowBox[{"(*", 
   RowBox[{
    RowBox[{"Print", "[", 
     RowBox[{
     "\"\<\[CurlyEpsilon]*\!\(\*SuperscriptBox[\(Wi\), \(2\)]\)=   \>\"", ",", 
      RowBox[{"\[CurlyEpsilon]", "*", 
       SuperscriptBox["Wi", "2"]}]}], "]"}], ";", 
    RowBox[{"Print", "[", 
     RowBox[{
     "\"\<\!\(\*FractionBox[\(\[CurlyEpsilon]*\*SuperscriptBox[\(Wi\), \
\(2\)]*\*SuperscriptBox[\(Pz\), \(2\)]\), \(2\)]\)=   \>\"", ",", 
      FractionBox[
       RowBox[{"\[CurlyEpsilon]", "*", 
        SuperscriptBox["Wi", "2"], "*", 
        SuperscriptBox["Pz", "2"]}], "2"]}], "]"}]}], "*)"}], 
  "\[IndentingNewLine]", "\[IndentingNewLine]", 
  RowBox[{"(*", 
   RowBox[{
    RowBox[{
     RowBox[{"shr", "[", "r_", "]"}], ":=", 
     RowBox[{
      RowBox[{"(", 
       RowBox[{
        RowBox[{"(", 
         RowBox[{
          RowBox[{"-", 
           RowBox[{"Gamma", "[", "\[Beta]", "]"}]}], "*", "Pz", "*", "b", "*",
           "R"}], ")"}], "/", 
        RowBox[{"(", 
         RowBox[{"2", "*", "\[Eta]"}], ")"}]}], ")"}], "*", 
      RowBox[{"(", 
       RowBox[{
        RowBox[{
         RowBox[{"(", 
          RowBox[{"b", "*", "R"}], ")"}], "/", "r"}], "-", 
        RowBox[{"r", "/", 
         RowBox[{"(", 
          RowBox[{"b", "*", "R"}], ")"}]}]}], ")"}], "*", 
      RowBox[{"MittagLefflerE", "[", 
       RowBox[{"\[Alpha]", ",", "\[Beta]", ",", 
        RowBox[{
         RowBox[{"(", 
          RowBox[{
           RowBox[{"(", 
            RowBox[{"2", "*", "\[CurlyEpsilon]", "*", 
             SuperscriptBox["\[Lambda]", "2"]}], ")"}], "/", 
           SuperscriptBox["\[Eta]", "2"]}], ")"}], "*", 
         SuperscriptBox[
          RowBox[{"(", 
           RowBox[{
            RowBox[{"(", 
             RowBox[{
              RowBox[{"(", 
               RowBox[{"Pz", "*", "b", "*", "R"}], ")"}], "/", "2"}], ")"}], 
            "*", 
            RowBox[{"(", 
             RowBox[{
              RowBox[{
               RowBox[{"(", 
                RowBox[{"b", "*", "R"}], ")"}], "/", "r"}], "-", 
              RowBox[{"r", "/", 
               RowBox[{"(", 
                RowBox[{"b", "*", "R"}], ")"}]}]}], ")"}]}], ")"}], "2"]}]}], 
       "]"}]}]}], " ", 
    RowBox[{"(*", 
     RowBox[{"shear", " ", "rate", " ", "with", " ", "dimensions"}], "*)"}], 
    ";"}], "*)"}]}], "\[IndentingNewLine]", 
 RowBox[{
  RowBox[{
   RowBox[{
    RowBox[{"shradi", "[", "r_", "]"}], ":=", 
    RowBox[{
     RowBox[{"(", 
      RowBox[{
       RowBox[{"Gamma", "[", "\[Beta]", "]"}], "/", "2"}], ")"}], "*", 
     RowBox[{"(", 
      RowBox[{
       RowBox[{
        RowBox[{"(", 
         RowBox[{
          SuperscriptBox["b", "2"], "*", 
          SuperscriptBox["RR", "2"]}], ")"}], "/", "r"}], "-", "r"}], ")"}], 
     "*", 
     RowBox[{"MittagLefflerE", "[", 
      RowBox[{"\[Alpha]", ",", "\[Beta]", ",", 
       RowBox[{
        RowBox[{"(", 
         RowBox[{
          RowBox[{"(", 
           RowBox[{"\[CurlyEpsilon]", "*", 
            SuperscriptBox["Wi", "2"]}], ")"}], "/", "2"}], ")"}], "*", 
        SuperscriptBox[
         RowBox[{"(", 
          RowBox[{
           RowBox[{
            RowBox[{"(", 
             RowBox[{
              SuperscriptBox["b", "2"], "*", 
              SuperscriptBox["RR", "2"]}], ")"}], "/", "r"}], "-", "r"}], 
          ")"}], "2"]}]}], "]"}]}]}], 
   RowBox[{"(*", 
    RowBox[{"dimensionless", " ", "shear", " ", "rate"}], "*)"}], ";"}], 
  "\[IndentingNewLine]", "\[IndentingNewLine]", 
  RowBox[{"(*", 
   RowBox[{"Print", "[", 
    RowBox[{"shradi", "[", "r", "]"}], "]"}], "*)"}], "\[IndentingNewLine]", 
  RowBox[{"(*", 
   RowBox[{
    RowBox[{"Print", "[", 
     RowBox[{"\"\<RR=\>\"", ",", "RR"}], "]"}], ";", "\[IndentingNewLine]", 
    RowBox[{"Print", "[", 
     RowBox[{"\"\<aR=\>\"", ",", 
      RowBox[{"a", "*", "RR"}]}], "]"}], ";", "\[IndentingNewLine]", 
    RowBox[{"Print", "[", 
     RowBox[{
     "\"\<\[CurlyEpsilon]*\!\(\*SuperscriptBox[\(Wi\), \(2\)]\)=\>\"", ",", 
      RowBox[{"\[CurlyEpsilon]", "*", 
       SuperscriptBox["Wi", "2"]}]}], "]"}]}], 
   "*)"}]}], "\[IndentingNewLine]", 
 RowBox[{
  RowBox[{
   RowBox[{"monitoredFindRoot", "[", "args__", "]"}], " ", ":=", " ", 
   RowBox[{"Module", "[", 
    RowBox[{
     RowBox[{"{", 
      RowBox[{
       RowBox[{"s", " ", "=", " ", "0"}], ",", " ", 
       RowBox[{"e", " ", "=", " ", "0"}], ",", 
       RowBox[{"j", " ", "=", " ", "0"}]}], "}"}], ",", "\[IndentingNewLine]", 
     RowBox[{"{", 
      RowBox[{
       RowBox[{"FindRoot", "[", 
        RowBox[{"args", ",", " ", 
         RowBox[{"StepMonitor", "\[RuleDelayed]", 
          RowBox[{"s", "++"}]}], ",", 
         RowBox[{"EvaluationMonitor", "\[RuleDelayed]", 
          RowBox[{"e", "++"}]}], ",", 
         RowBox[{"Jacobian", "\[Rule]", 
          RowBox[{"{", 
           RowBox[{"Automatic", ",", 
            RowBox[{"EvaluationMonitor", "\[RuleDelayed]", 
             RowBox[{"j", "++"}]}]}], "}"}]}]}], "]"}], ",", 
       RowBox[{"\"\<Steps\>\"", "\[Rule]", "s"}], ",", 
       RowBox[{"\"\<Evaluations\>\"", "\[Rule]", "e"}], ",", 
       RowBox[{"\"\<Jacobian Evaluations\>\"", "\[Rule]", "j"}]}], "}"}]}], 
    "]"}]}], ";"}], "\[IndentingNewLine]", 
 RowBox[{
  RowBox[{"bval", "=", 
   RowBox[{
    RowBox[{
     RowBox[{
      RowBox[{"monitoredFindRoot", "[", 
       RowBox[{
        RowBox[{
         RowBox[{"NIntegrate", "[", 
          RowBox[{
           RowBox[{"shradi", "[", "r", "]"}], ",", 
           RowBox[{"{", 
            RowBox[{"r", ",", 
             RowBox[{"a", "*", "RR"}], ",", "RR"}], "}"}]}], "]"}], "==", 
         "0"}], ",", 
        RowBox[{"{", 
         RowBox[{"b", ",", "0.71", ",", "0.72"}], "}"}], ",", 
        RowBox[{"Method", "\[Rule]", "\"\<Secant\>\""}], ",", 
        RowBox[{"MaxIterations", "\[Rule]", "200"}], ",", 
        RowBox[{"WorkingPrecision", "\[Rule]", "20"}]}], "]"}], "[", 
      RowBox[{"[", "1", "]"}], "]"}], "[", 
     RowBox[{"[", "1", "]"}], "]"}], "[", 
    RowBox[{"[", "2", "]"}], "]"}]}], 
  RowBox[{"(*", 
   RowBox[{"//", "Timing"}], "*)"}]}], "\[IndentingNewLine]"}], "Input",
 CellChangeTimes->{{3.811581335641527*^9, 3.8115813573538284`*^9}, {
   3.811581402497946*^9, 3.81158163033576*^9}, {3.811582173409083*^9, 
   3.8115821977881556`*^9}, {3.8115822364962945`*^9, 3.811582239926502*^9}, {
   3.811582299271102*^9, 3.8115823003925867`*^9}, {3.8115823618239317`*^9, 
   3.8115823642878036`*^9}, {3.811582438912726*^9, 3.811582458520773*^9}, {
   3.811582496778965*^9, 3.8115825054646473`*^9}, {3.811582867115514*^9, 
   3.8115829487950172`*^9}, {3.8115831062463303`*^9, 
   3.8115831378201213`*^9}, {3.811585837099334*^9, 3.811585935947691*^9}, {
   3.8115861688017573`*^9, 3.811586211990391*^9}, {3.811586362200424*^9, 
   3.811586392835412*^9}, 3.8115864245402994`*^9, 3.8115870768348775`*^9, {
   3.8115873075348053`*^9, 3.8115873165837655`*^9}, {3.811587350570904*^9, 
   3.811587378729339*^9}, {3.8115874430184803`*^9, 3.8115874734370594`*^9}, {
   3.8115880632377024`*^9, 3.811588072722515*^9}, {3.863076695236706*^9, 
   3.8630766998811603`*^9}, {3.863076811301973*^9, 3.8630768114579744`*^9}, {
   3.863076947157714*^9, 3.8630769481851425`*^9}, {3.8630770823585277`*^9, 
   3.863077082993531*^9}, {3.863077123877022*^9, 3.8630771308814154`*^9}, {
   3.8630772420462303`*^9, 3.8630772420915937`*^9}, {3.8630773616110015`*^9, 
   3.863077378977009*^9}, {3.8630774660016093`*^9, 3.863077466095864*^9}, {
   3.863078017815965*^9, 3.8630780181839314`*^9}, {3.8630782114076395`*^9, 
   3.8630782115436134`*^9}, {3.863078358286437*^9, 3.8630783595322666`*^9}, {
   3.8630792039806385`*^9, 3.8630792043733015`*^9}, {3.863079238149926*^9, 
   3.8630792395459576`*^9}, {3.8630794555645986`*^9, 
   3.8630794563783984`*^9}, {3.863079572170246*^9, 3.8630795724352446`*^9}, {
   3.86309658532751*^9, 3.863096586051573*^9}, {3.863163834651437*^9, 
   3.863163834804706*^9}, {3.8631639487167788`*^9, 3.8631639498587446`*^9}, {
   3.8631641987105603`*^9, 3.8631642290622635`*^9}, {3.8631643339390497`*^9, 
   3.863164372090565*^9}, {3.86316444720994*^9, 3.8631645186890697`*^9}, {
   3.8631645754530387`*^9, 3.863164575838208*^9}, {3.8631649195636387`*^9, 
   3.8631649256672034`*^9}, {3.8631650251972866`*^9, 3.863165026615361*^9}, {
   3.8631651737727766`*^9, 3.8631652123175464`*^9}, {3.863165280910658*^9, 
   3.8631653085530167`*^9}, 3.863165422685361*^9, {3.863165740742323*^9, 
   3.863165746144602*^9}, {3.8631658006570406`*^9, 3.863165829676419*^9}, {
   3.863166018505011*^9, 3.8631660360935645`*^9}, {3.863166071329934*^9, 
   3.863166072681321*^9}, {3.8631661442748237`*^9, 3.8631661455049295`*^9}, {
   3.863166179685687*^9, 3.8631661874265213`*^9}, 3.8631668849105864`*^9, {
   3.8631670029689584`*^9, 3.863167010361988*^9}, {3.863167078749917*^9, 
   3.8631670800797834`*^9}, {3.8631671602143393`*^9, 
   3.8631671844923306`*^9}, {3.863167389166398*^9, 3.863167393410466*^9}, {
   3.863167482454281*^9, 3.863167517535946*^9}, {3.8631675515410814`*^9, 
   3.863167559999067*^9}, {3.863167607861885*^9, 3.863167708811313*^9}, {
   3.8631677427248216`*^9, 3.8631677719557905`*^9}, {3.863167837631422*^9, 
   3.8631678686647844`*^9}, {3.863168183408965*^9, 3.8631681843966074`*^9}, {
   3.863168504541766*^9, 3.86316851798724*^9}, {3.8631707176803284`*^9, 
   3.8631707187686176`*^9}, {3.863172852983514*^9, 3.8631728585510864`*^9}, {
   3.863248203409088*^9, 3.863248210493389*^9}, {3.8632510624663367`*^9, 
   3.863251064020338*^9}, {3.863251348742797*^9, 3.8632513768338175`*^9}, 
   3.863251846314201*^9, 3.8632607434114265`*^9, {3.863260774622406*^9, 
   3.86326077571741*^9}, {3.8632608211339664`*^9, 3.8632608325022984`*^9}, {
   3.8632613215725107`*^9, 3.8632613379724865`*^9}, {3.8632613756121883`*^9, 
   3.8632613932853603`*^9}, {3.863261423646326*^9, 3.8632614241410656`*^9}, 
   3.863261613776599*^9, 3.863262485802846*^9, {3.8632629156358633`*^9, 
   3.863262927939353*^9}, 3.8632631192358217`*^9, {3.8632638452920923`*^9, 
   3.8632638549419594`*^9}, 3.8632649252543697`*^9, {3.863265254191832*^9, 
   3.8632652775553184`*^9}, {3.8632653450266933`*^9, 3.86326534638518*^9}, 
   3.863272324934826*^9, {3.863508805236381*^9, 3.8635088311606903`*^9}, {
   3.863509568087755*^9, 3.863509568602767*^9}, {3.863524294480805*^9, 
   3.863524294554762*^9}, 3.863526784159421*^9, {3.8635268173812118`*^9, 
   3.8635268331202464`*^9}, {3.8635270885748158`*^9, 3.863527093093807*^9}, {
   3.8635280724831986`*^9, 3.8635280729331465`*^9}, {3.8635289086118584`*^9, 
   3.8635289088818607`*^9}, {3.863528942175836*^9, 3.863528984544731*^9}, {
   3.863530431081396*^9, 3.8635304313884172`*^9}, {3.863530540490163*^9, 
   3.8635305418387747`*^9}, {3.8635315100637045`*^9, 
   3.8635315157314987`*^9}, {3.8635321625124583`*^9, 3.863532188382306*^9}, {
   3.863532237135379*^9, 3.8635322385246997`*^9}, 3.8635328178351574`*^9, {
   3.8636089597894135`*^9, 3.8636089605693874`*^9}, {3.8636090786856565`*^9, 
   3.863609078920354*^9}, {3.8636091268788867`*^9, 3.8636091709753237`*^9}, {
   3.86360927294981*^9, 3.8636092739434204`*^9}, 3.863610643123436*^9, {
   3.8636107230961037`*^9, 3.8636107687289233`*^9}, {3.8636108448670816`*^9, 
   3.863610870461358*^9}, {3.863611088065284*^9, 3.8636110884452443`*^9}, {
   3.863611161703317*^9, 3.863611176378622*^9}, {3.863611703644417*^9, 
   3.863611704146617*^9}, {3.8636123733069496`*^9, 3.863612374539981*^9}, {
   3.863612588391816*^9, 3.863612588486573*^9}, {3.864473074710617*^9, 
   3.8644730778983088`*^9}, {3.8866579161947875`*^9, 3.886657936399472*^9}, {
   3.8866579705211897`*^9, 3.8866580129304347`*^9}, 3.8866581689215126`*^9, {
   3.8868258404213166`*^9, 3.8868258420220156`*^9}, {3.8868417281407213`*^9, 
   3.8868417420135*^9}, {3.886842527734398*^9, 3.8868425278449516`*^9}, {
   3.886843161849834*^9, 3.8868431630756683`*^9}, {3.886843210723645*^9, 
   3.8868432301702967`*^9}, {3.886843272614681*^9, 3.8868432730870304`*^9}, {
   3.8868436040303793`*^9, 3.88684360525296*^9}, {3.8868446125612383`*^9, 
   3.8868446190460577`*^9}, {3.886844793709073*^9, 3.8868447949485197`*^9}, {
   3.886845086487685*^9, 3.886845096156297*^9}, {3.886845296639737*^9, 
   3.886845297802281*^9}, {3.8868453705801115`*^9, 3.886845371190176*^9}, {
   3.8868456018819227`*^9, 3.886845604841674*^9}, {3.886845846205924*^9, 
   3.8868458474868*^9}, {3.8868461323236375`*^9, 3.886846139633462*^9}, {
   3.886846195333829*^9, 3.8868461964415655`*^9}, {3.886846594246009*^9, 
   3.8868465956443686`*^9}, {3.8868467096602635`*^9, 3.886846720398134*^9}, {
   3.8868481988881397`*^9, 3.886848203001984*^9}, {3.886848300670458*^9, 
   3.8868483174316926`*^9}, {3.8868488301407995`*^9, 3.886848838072506*^9}, {
   3.886848895226332*^9, 3.8868488994049473`*^9}, 3.886849006463664*^9, {
   3.8868496542387133`*^9, 3.886849654694129*^9}, {3.8868497745815315`*^9, 
   3.886849775068697*^9}, {3.8870847447217636`*^9, 3.887084751617061*^9}, {
   3.8870851039804554`*^9, 3.8870851046447043`*^9}, {3.8870884667587576`*^9, 
   3.8870884680474925`*^9}, {3.887091181856455*^9, 3.8870911820423627`*^9}, {
   3.887092295312753*^9, 3.8870922987577734`*^9}, {3.887092366054256*^9, 
   3.8870923664937043`*^9}, {3.8870980390085983`*^9, 
   3.8870980423926115`*^9}, {3.8871002618412895`*^9, 3.887100262295209*^9}, {
   3.887100355511304*^9, 3.8871003566194377`*^9}, {3.887192973808544*^9, 
   3.8871929812846227`*^9}, {3.8871930752667575`*^9, 3.887193076280693*^9}, 
   3.887193602526704*^9, {3.8871941656479387`*^9, 3.8871941675451922`*^9}, {
   3.887194329598817*^9, 3.8871943312809243`*^9}, {3.887194462986133*^9, 
   3.887194464264908*^9}, {3.887194680640854*^9, 3.88719468224463*^9}, 
   3.887255304817087*^9, {3.88725547820338*^9, 3.887255479127569*^9}, {
   3.8872558661177597`*^9, 3.8872558703569984`*^9}, {3.887255980360263*^9, 
   3.8872560049822063`*^9}, {3.8872560707451763`*^9, 3.887256071788401*^9}, {
   3.8872564407104588`*^9, 3.887256445297474*^9}, {3.887256522894908*^9, 
   3.8872565237019644`*^9}, {3.887256577384969*^9, 3.887256579864745*^9}, {
   3.8872566501159787`*^9, 3.887256651680705*^9}, {3.88725687609826*^9, 
   3.8872568858912773`*^9}, {3.887256981539891*^9, 3.887256982840872*^9}, {
   3.8872572016104646`*^9, 3.887257203057356*^9}, {3.887257320156105*^9, 
   3.8872573212652717`*^9}, {3.8872577379237194`*^9, 
   3.8872577385740128`*^9}, {3.8872584999989643`*^9, 
   3.8872585010370636`*^9}, {3.887258531327092*^9, 3.8872585319407873`*^9}, {
   3.887258621356637*^9, 3.887258624358353*^9}, 3.8872607276075077`*^9, {
   3.8872612528867455`*^9, 3.8872612541664524`*^9}, {3.887262780400897*^9, 
   3.8872627856785326`*^9}, {3.887262840317606*^9, 3.887262841215578*^9}, {
   3.887263003346568*^9, 3.887263004688045*^9}, {3.887263154594396*^9, 
   3.887263155705512*^9}, {3.887263958857444*^9, 3.887263965404171*^9}, {
   3.8872644275259438`*^9, 3.8872644286034307`*^9}, {3.887272354646907*^9, 
   3.8872723548002124`*^9}, {3.887272431595531*^9, 3.887272432449462*^9}, {
   3.8872727745056314`*^9, 3.8872727758739243`*^9}, {3.8872764288010855`*^9, 
   3.8872764298154125`*^9}, {3.887276755234886*^9, 3.8872767590020485`*^9}, {
   3.887361754006693*^9, 3.8873617549775667`*^9}, {3.8873670467575483`*^9, 
   3.887367056897071*^9}, {3.8873673784128256`*^9, 3.8873673789238653`*^9}, {
   3.8873677033307333`*^9, 3.8873677047803397`*^9}, 3.88736785101435*^9, {
   3.887369129764695*^9, 3.887369132126065*^9}, {3.887369334412302*^9, 
   3.887369335018467*^9}, {3.887371740771432*^9, 3.887371741153606*^9}, {
   3.887371851661805*^9, 3.8873718546817393`*^9}, {3.8873719446583786`*^9, 
   3.887371945929719*^9}, {3.887372082051605*^9, 3.8873720830892534`*^9}, {
   3.8874373865152407`*^9, 3.8874373899222436`*^9}, {3.8874506227647204`*^9, 
   3.887450634767536*^9}, {3.8874509897267084`*^9, 3.8874509910685253`*^9}, {
   3.887451092241705*^9, 3.8874510926921453`*^9}, {3.8874512504608746`*^9, 
   3.8874512517739363`*^9}, {3.887451358870975*^9, 3.887451359449322*^9}, {
   3.8874539169701953`*^9, 3.887453917367394*^9}, {3.8874540507842026`*^9, 
   3.8874540520880747`*^9}, {3.887454177937662*^9, 3.887454178424446*^9}, {
   3.887454255398991*^9, 3.8874542567277584`*^9}, {3.8877060832300167`*^9, 
   3.887706086455217*^9}, {3.887706212321815*^9, 3.887706217062199*^9}, {
   3.8877063006147523`*^9, 3.8877063024955225`*^9}, {3.8877064555035906`*^9, 
   3.8877064706753993`*^9}, {3.8877065718787003`*^9, 3.88770657266895*^9}, {
   3.887706625153941*^9, 3.88770662595028*^9}},
 CellLabel->
  "In[116]:=",ExpressionUUID->"43459b01-55b7-4e0f-a0c1-1a8e24f5a5cd"],

Cell[BoxData[
 TemplateBox[{
  "NIntegrate", "inumr", 
   "\"The integrand \\!\\(\\*FractionBox[RowBox[{\\\"4\\\", \\\" \\\", \
SuperscriptBox[\\\"\[ExponentialE]\\\", RowBox[{FractionBox[\\\"1\\\", \
\\\"2\\\"], \\\" \\\", SuperscriptBox[RowBox[{\\\"(\\\", \
RowBox[{FractionBox[RowBox[{\\\"4\\\", \\\" \\\", SuperscriptBox[\\\"b\\\", \
\\\"2\\\"]}], \\\"r\\\"], \\\"-\\\", \\\"r\\\"}], \\\")\\\"}], \\\"2\\\"]}]], \
\\\" \\\", RowBox[{\\\"GammaRegularized\\\", \\\"[\\\", RowBox[{\\\"2\\\", \\\
\",\\\", \\\"0\\\", \\\",\\\", RowBox[{FractionBox[\\\"1\\\", \\\"2\\\"], \
\\\" \\\", SuperscriptBox[RowBox[{\\\"(\\\", \
RowBox[{FractionBox[RowBox[{\\\"4\\\", \\\" \\\", SuperscriptBox[\\\"b\\\", \
\\\"2\\\"]}], \\\"r\\\"], \\\"-\\\", \\\"r\\\"}], \\\")\\\"}], \
\\\"2\\\"]}]}], \\\"]\\\"}]}], SuperscriptBox[RowBox[{\\\"(\\\", \
RowBox[{FractionBox[RowBox[{\\\"4\\\", \\\" \\\", SuperscriptBox[\\\"b\\\", \
\\\"2\\\"]}], \\\"r\\\"], \\\"-\\\", \\\"r\\\"}], \\\")\\\"}], \\\"3\\\"]]\\) \
has evaluated to non-numerical values for all sampling points in the region \
with boundaries \\!\\(\\*RowBox[{\\\"{\\\", RowBox[{\\\"{\\\", \
RowBox[{\\\"1\\\", \\\",\\\", \\\"2\\\"}], \\\"}\\\"}], \\\"}\\\"}]\\).\"", 2,
    120, 64, 32768233118347298895, "Local"},
  "MessageTemplate"]], "Message", "MSG",
 CellChangeTimes->{{3.8866580063942924`*^9, 3.8866580173802977`*^9}, {
   3.8866580506604357`*^9, 3.886658069980263*^9}, 3.8866581777046127`*^9, 
   3.886825851596228*^9, 3.886840563378843*^9, 3.8868417474298306`*^9, 
   3.886842538781741*^9, 3.88684328232364*^9, 3.886843609595419*^9, 
   3.8868446257478805`*^9, 3.8868447995761657`*^9, 3.8868451151408443`*^9, 
   3.886845305572522*^9, 3.886845375594508*^9, 3.886845609678694*^9, 
   3.8868458512254734`*^9, 3.8868461418968105`*^9, 3.8868462002868524`*^9, 
   3.886846598681249*^9, 3.8868467230438814`*^9, 3.8868482289347672`*^9, {
   3.886848289476856*^9, 3.8868483205762076`*^9}, 3.8868488437822638`*^9, 
   3.886848902293506*^9, 3.8868490098174653`*^9, 3.886849657627902*^9, 
   3.8868497821671495`*^9, 3.8870847552050915`*^9, 3.8870851072406406`*^9, 
   3.88708847657008*^9, 3.887091187524126*^9, 3.887092370454877*^9, 
   3.887098045553253*^9, 3.887100359243473*^9, 3.8871927302805223`*^9, 
   3.8871929848090553`*^9, 3.8871930803928022`*^9, 3.8871936067026405`*^9, 
   3.887194170860731*^9, 3.887194336872016*^9, 3.8871944692744737`*^9, 
   3.887194686107586*^9, 3.8872553110815797`*^9, {3.8872554645851*^9, 
   3.8872554825648046`*^9}, 3.887255873449281*^9, {3.88725598372371*^9, 
   3.8872560074987097`*^9}, 3.887256074271657*^9, 3.8872561931131954`*^9, 
   3.887256448116213*^9, 3.8872565256358185`*^9, 3.8872565819598475`*^9, 
   3.8872566544570036`*^9, 3.8872568885510263`*^9, 3.887256985317211*^9, 
   3.887257207252524*^9, 3.8872573238416405`*^9, 3.8872577452466016`*^9, 
   3.8872585037248745`*^9, 3.8872585346875296`*^9, 3.8872586284801197`*^9, 
   3.88726073023528*^9, 3.8872609301614375`*^9, 3.8872612567462482`*^9, 
   3.8872627897438903`*^9, 3.8872628433120213`*^9, 3.8872630080500607`*^9, 
   3.887263158947356*^9, 3.8872639686218343`*^9, 3.88726443044263*^9, 
   3.8872723591427984`*^9, 3.8872724342466516`*^9, 3.887272778059597*^9, 
   3.887276432775436*^9, 3.8872767644366407`*^9, 3.887361760545535*^9, 
   3.887367059896857*^9, 3.8873673815348406`*^9, 3.8873677076573114`*^9, 
   3.887367853814427*^9, 3.8873691356336813`*^9, 3.8873693381840677`*^9, 
   3.8873717454655466`*^9, 3.8873718575595474`*^9, {3.8873719223545947`*^9, 
   3.8873719483530693`*^9}, 3.8873720857676983`*^9, 3.8873721372899632`*^9, 
   3.887450637171606*^9, 3.887450759276091*^9, 3.8874509936436434`*^9, 
   3.8874510947238894`*^9, 3.887451255492584*^9, 3.887451300192728*^9, 
   3.8874513630233927`*^9, 3.887453919903736*^9, 3.887454054364539*^9, 
   3.887454182218364*^9, 3.887454258849715*^9, 3.8877060957208757`*^9, 
   3.8877062198395576`*^9, {3.88770628063596*^9, 3.887706304464589*^9}, 
   3.887706473136852*^9, 3.8877065753538055`*^9, 3.887706628400951*^9},
 CellLabel->
  "During evaluation of \
In[116]:=",ExpressionUUID->"aacaffdc-bd19-4b78-b236-d68c794c71a6"],

Cell[BoxData[
 TemplateBox[{
  "NIntegrate", "inumr", 
   "\"The integrand \\!\\(\\*FractionBox[RowBox[{\\\"4\\\", \\\" \\\", \
SuperscriptBox[\\\"\[ExponentialE]\\\", RowBox[{FractionBox[\\\"1\\\", \
\\\"2\\\"], \\\" \\\", SuperscriptBox[RowBox[{\\\"(\\\", \
RowBox[{FractionBox[RowBox[{\\\"4\\\", \\\" \\\", SuperscriptBox[\\\"b\\\", \
\\\"2\\\"]}], \\\"r\\\"], \\\"-\\\", \\\"r\\\"}], \\\")\\\"}], \\\"2\\\"]}]], \
\\\" \\\", RowBox[{\\\"GammaRegularized\\\", \\\"[\\\", RowBox[{\\\"2\\\", \\\
\",\\\", \\\"0\\\", \\\",\\\", RowBox[{FractionBox[\\\"1\\\", \\\"2\\\"], \
\\\" \\\", SuperscriptBox[RowBox[{\\\"(\\\", \
RowBox[{FractionBox[RowBox[{\\\"4\\\", \\\" \\\", SuperscriptBox[\\\"b\\\", \
\\\"2\\\"]}], \\\"r\\\"], \\\"-\\\", \\\"r\\\"}], \\\")\\\"}], \
\\\"2\\\"]}]}], \\\"]\\\"}]}], SuperscriptBox[RowBox[{\\\"(\\\", \
RowBox[{FractionBox[RowBox[{\\\"4\\\", \\\" \\\", SuperscriptBox[\\\"b\\\", \
\\\"2\\\"]}], \\\"r\\\"], \\\"-\\\", \\\"r\\\"}], \\\")\\\"}], \\\"3\\\"]]\\) \
has evaluated to non-numerical values for all sampling points in the region \
with boundaries \\!\\(\\*RowBox[{\\\"{\\\", RowBox[{\\\"{\\\", \
RowBox[{\\\"1\\\", \\\",\\\", \\\"2\\\"}], \\\"}\\\"}], \\\"}\\\"}]\\).\"", 2,
    120, 65, 32768233118347298895, "Local"},
  "MessageTemplate"]], "Message", "MSG",
 CellChangeTimes->{{3.8866580063942924`*^9, 3.8866580173802977`*^9}, {
   3.8866580506604357`*^9, 3.886658069980263*^9}, 3.8866581777046127`*^9, 
   3.886825851596228*^9, 3.886840563378843*^9, 3.8868417474298306`*^9, 
   3.886842538781741*^9, 3.88684328232364*^9, 3.886843609595419*^9, 
   3.8868446257478805`*^9, 3.8868447995761657`*^9, 3.8868451151408443`*^9, 
   3.886845305572522*^9, 3.886845375594508*^9, 3.886845609678694*^9, 
   3.8868458512254734`*^9, 3.8868461418968105`*^9, 3.8868462002868524`*^9, 
   3.886846598681249*^9, 3.8868467230438814`*^9, 3.8868482289347672`*^9, {
   3.886848289476856*^9, 3.8868483205762076`*^9}, 3.8868488437822638`*^9, 
   3.886848902293506*^9, 3.8868490098174653`*^9, 3.886849657627902*^9, 
   3.8868497821671495`*^9, 3.8870847552050915`*^9, 3.8870851072406406`*^9, 
   3.88708847657008*^9, 3.887091187524126*^9, 3.887092370454877*^9, 
   3.887098045553253*^9, 3.887100359243473*^9, 3.8871927302805223`*^9, 
   3.8871929848090553`*^9, 3.8871930803928022`*^9, 3.8871936067026405`*^9, 
   3.887194170860731*^9, 3.887194336872016*^9, 3.8871944692744737`*^9, 
   3.887194686107586*^9, 3.8872553110815797`*^9, {3.8872554645851*^9, 
   3.8872554825648046`*^9}, 3.887255873449281*^9, {3.88725598372371*^9, 
   3.8872560074987097`*^9}, 3.887256074271657*^9, 3.8872561931131954`*^9, 
   3.887256448116213*^9, 3.8872565256358185`*^9, 3.8872565819598475`*^9, 
   3.8872566544570036`*^9, 3.8872568885510263`*^9, 3.887256985317211*^9, 
   3.887257207252524*^9, 3.8872573238416405`*^9, 3.8872577452466016`*^9, 
   3.8872585037248745`*^9, 3.8872585346875296`*^9, 3.8872586284801197`*^9, 
   3.88726073023528*^9, 3.8872609301614375`*^9, 3.8872612567462482`*^9, 
   3.8872627897438903`*^9, 3.8872628433120213`*^9, 3.8872630080500607`*^9, 
   3.887263158947356*^9, 3.8872639686218343`*^9, 3.88726443044263*^9, 
   3.8872723591427984`*^9, 3.8872724342466516`*^9, 3.887272778059597*^9, 
   3.887276432775436*^9, 3.8872767644366407`*^9, 3.887361760545535*^9, 
   3.887367059896857*^9, 3.8873673815348406`*^9, 3.8873677076573114`*^9, 
   3.887367853814427*^9, 3.8873691356336813`*^9, 3.8873693381840677`*^9, 
   3.8873717454655466`*^9, 3.8873718575595474`*^9, {3.8873719223545947`*^9, 
   3.8873719483530693`*^9}, 3.8873720857676983`*^9, 3.8873721372899632`*^9, 
   3.887450637171606*^9, 3.887450759276091*^9, 3.8874509936436434`*^9, 
   3.8874510947238894`*^9, 3.887451255492584*^9, 3.887451300192728*^9, 
   3.8874513630233927`*^9, 3.887453919903736*^9, 3.887454054364539*^9, 
   3.887454182218364*^9, 3.887454258849715*^9, 3.8877060957208757`*^9, 
   3.8877062198395576`*^9, {3.88770628063596*^9, 3.887706304464589*^9}, 
   3.887706473136852*^9, 3.8877065753538055`*^9, 3.88770662841288*^9},
 CellLabel->
  "During evaluation of \
In[116]:=",ExpressionUUID->"713110f9-6c40-4a38-9897-29410895121a"],

Cell[BoxData[
 TemplateBox[{
  "NIntegrate", "ncvb", 
   "\"NIntegrate failed to converge to prescribed accuracy after \
\\!\\(\\*RowBox[{\\\"9\\\"}]\\) recursive bisections in \
\\!\\(\\*RowBox[{\\\"r\\\"}]\\) near \\!\\(\\*RowBox[{\\\"{\\\", \\\"r\\\", \
\\\"}\\\"}]\\) = \\!\\(\\*RowBox[{\\\"{\\\", \
\\\"1.99999998206481784018499997731624644344006203056096637737937271595`65.\
954589770191\\\", \\\"}\\\"}]\\). NIntegrate obtained \
\\!\\(\\*RowBox[{\\\"4.7725712271073917`*^-14\\\"}]\\) and \
\\!\\(\\*RowBox[{\\\"9.908820277880533`*^-14\\\"}]\\) for the integral and \
error estimates.\"", 2, 120, 66, 32768233118347298895, "Local"},
  "MessageTemplate"]], "Message", "MSG",
 CellChangeTimes->{{3.8866580063942924`*^9, 3.8866580173802977`*^9}, {
   3.8866580506604357`*^9, 3.886658069980263*^9}, 3.8866581777046127`*^9, 
   3.886825851596228*^9, 3.886840563378843*^9, 3.8868417474298306`*^9, 
   3.886842538781741*^9, 3.88684328232364*^9, 3.886843609595419*^9, 
   3.8868446257478805`*^9, 3.8868447995761657`*^9, 3.8868451151408443`*^9, 
   3.886845305572522*^9, 3.886845375594508*^9, 3.886845609678694*^9, 
   3.8868458512254734`*^9, 3.8868461418968105`*^9, 3.8868462002868524`*^9, 
   3.886846598681249*^9, 3.8868467230438814`*^9, 3.8868482289347672`*^9, {
   3.886848289476856*^9, 3.8868483205762076`*^9}, 3.8868488437822638`*^9, 
   3.886848902293506*^9, 3.8868490098174653`*^9, 3.886849657627902*^9, 
   3.8868497821671495`*^9, 3.8870847552050915`*^9, 3.8870851072406406`*^9, 
   3.88708847657008*^9, 3.887091187524126*^9, 3.887092370454877*^9, 
   3.887098045553253*^9, 3.887100359243473*^9, 3.8871927302805223`*^9, 
   3.8871929848090553`*^9, 3.8871930803928022`*^9, 3.8871936067026405`*^9, 
   3.887194170860731*^9, 3.887194336872016*^9, 3.8871944692744737`*^9, 
   3.887194686107586*^9, 3.8872553110815797`*^9, {3.8872554645851*^9, 
   3.8872554825648046`*^9}, 3.887255873449281*^9, {3.88725598372371*^9, 
   3.8872560074987097`*^9}, 3.887256074271657*^9, 3.8872561931131954`*^9, 
   3.887256448116213*^9, 3.8872565256358185`*^9, 3.8872565819598475`*^9, 
   3.8872566544570036`*^9, 3.8872568885510263`*^9, 3.887256985317211*^9, 
   3.887257207252524*^9, 3.8872573238416405`*^9, 3.8872577452466016`*^9, 
   3.8872585037248745`*^9, 3.8872585346875296`*^9, 3.8872586284801197`*^9, 
   3.88726073023528*^9, 3.8872609301614375`*^9, 3.8872612567462482`*^9, 
   3.8872627897438903`*^9, 3.8872628433120213`*^9, 3.8872630080500607`*^9, 
   3.887263158947356*^9, 3.8872639686218343`*^9, 3.88726443044263*^9, 
   3.8872723591427984`*^9, 3.8872724342466516`*^9, 3.887272778059597*^9, 
   3.887276432775436*^9, 3.8872767644366407`*^9, 3.887361760545535*^9, 
   3.887367059896857*^9, 3.8873673815348406`*^9, 3.8873677076573114`*^9, 
   3.887367853814427*^9, 3.8873691356336813`*^9, 3.8873693381840677`*^9, 
   3.8873717454655466`*^9, 3.8873718575595474`*^9, {3.8873719223545947`*^9, 
   3.8873719483530693`*^9}, 3.8873720857676983`*^9, 3.8873721372899632`*^9, 
   3.887450637171606*^9, 3.887450759276091*^9, 3.8874509936436434`*^9, 
   3.8874510947238894`*^9, 3.887451255492584*^9, 3.887451300192728*^9, 
   3.8874513630233927`*^9, 3.887453919903736*^9, 3.887454054364539*^9, 
   3.887454182218364*^9, 3.887454258849715*^9, 3.8877060957208757`*^9, 
   3.8877062198395576`*^9, {3.88770628063596*^9, 3.887706304464589*^9}, 
   3.887706473136852*^9, 3.8877065753538055`*^9, 3.887706628514695*^9},
 CellLabel->
  "During evaluation of \
In[116]:=",ExpressionUUID->"a36b8ec3-1691-4437-b95a-d2a531705a79"],

Cell[BoxData[
 TemplateBox[{
  "NIntegrate", "ncvb", 
   "\"NIntegrate failed to converge to prescribed accuracy after \
\\!\\(\\*RowBox[{\\\"9\\\"}]\\) recursive bisections in \
\\!\\(\\*RowBox[{\\\"r\\\"}]\\) near \\!\\(\\*RowBox[{\\\"{\\\", \\\"r\\\", \
\\\"}\\\"}]\\) = \\!\\(\\*RowBox[{\\\"{\\\", \
\\\"1.99999998206481784018499997731624644344006203056096637737937271595`65.\
954589770191\\\", \\\"}\\\"}]\\). NIntegrate obtained \
\\!\\(\\*RowBox[{\\\"4.7378767575878555`*^-14\\\"}]\\) and \
\\!\\(\\*RowBox[{\\\"9.909326414456552`*^-14\\\"}]\\) for the integral and \
error estimates.\"", 2, 120, 67, 32768233118347298895, "Local"},
  "MessageTemplate"]], "Message", "MSG",
 CellChangeTimes->{{3.8866580063942924`*^9, 3.8866580173802977`*^9}, {
   3.8866580506604357`*^9, 3.886658069980263*^9}, 3.8866581777046127`*^9, 
   3.886825851596228*^9, 3.886840563378843*^9, 3.8868417474298306`*^9, 
   3.886842538781741*^9, 3.88684328232364*^9, 3.886843609595419*^9, 
   3.8868446257478805`*^9, 3.8868447995761657`*^9, 3.8868451151408443`*^9, 
   3.886845305572522*^9, 3.886845375594508*^9, 3.886845609678694*^9, 
   3.8868458512254734`*^9, 3.8868461418968105`*^9, 3.8868462002868524`*^9, 
   3.886846598681249*^9, 3.8868467230438814`*^9, 3.8868482289347672`*^9, {
   3.886848289476856*^9, 3.8868483205762076`*^9}, 3.8868488437822638`*^9, 
   3.886848902293506*^9, 3.8868490098174653`*^9, 3.886849657627902*^9, 
   3.8868497821671495`*^9, 3.8870847552050915`*^9, 3.8870851072406406`*^9, 
   3.88708847657008*^9, 3.887091187524126*^9, 3.887092370454877*^9, 
   3.887098045553253*^9, 3.887100359243473*^9, 3.8871927302805223`*^9, 
   3.8871929848090553`*^9, 3.8871930803928022`*^9, 3.8871936067026405`*^9, 
   3.887194170860731*^9, 3.887194336872016*^9, 3.8871944692744737`*^9, 
   3.887194686107586*^9, 3.8872553110815797`*^9, {3.8872554645851*^9, 
   3.8872554825648046`*^9}, 3.887255873449281*^9, {3.88725598372371*^9, 
   3.8872560074987097`*^9}, 3.887256074271657*^9, 3.8872561931131954`*^9, 
   3.887256448116213*^9, 3.8872565256358185`*^9, 3.8872565819598475`*^9, 
   3.8872566544570036`*^9, 3.8872568885510263`*^9, 3.887256985317211*^9, 
   3.887257207252524*^9, 3.8872573238416405`*^9, 3.8872577452466016`*^9, 
   3.8872585037248745`*^9, 3.8872585346875296`*^9, 3.8872586284801197`*^9, 
   3.88726073023528*^9, 3.8872609301614375`*^9, 3.8872612567462482`*^9, 
   3.8872627897438903`*^9, 3.8872628433120213`*^9, 3.8872630080500607`*^9, 
   3.887263158947356*^9, 3.8872639686218343`*^9, 3.88726443044263*^9, 
   3.8872723591427984`*^9, 3.8872724342466516`*^9, 3.887272778059597*^9, 
   3.887276432775436*^9, 3.8872767644366407`*^9, 3.887361760545535*^9, 
   3.887367059896857*^9, 3.8873673815348406`*^9, 3.8873677076573114`*^9, 
   3.887367853814427*^9, 3.8873691356336813`*^9, 3.8873693381840677`*^9, 
   3.8873717454655466`*^9, 3.8873718575595474`*^9, {3.8873719223545947`*^9, 
   3.8873719483530693`*^9}, 3.8873720857676983`*^9, 3.8873721372899632`*^9, 
   3.887450637171606*^9, 3.887450759276091*^9, 3.8874509936436434`*^9, 
   3.8874510947238894`*^9, 3.887451255492584*^9, 3.887451300192728*^9, 
   3.8874513630233927`*^9, 3.887453919903736*^9, 3.887454054364539*^9, 
   3.887454182218364*^9, 3.887454258849715*^9, 3.8877060957208757`*^9, 
   3.8877062198395576`*^9, {3.88770628063596*^9, 3.887706304464589*^9}, 
   3.887706473136852*^9, 3.8877065753538055`*^9, 3.8877066285667486`*^9},
 CellLabel->
  "During evaluation of \
In[116]:=",ExpressionUUID->"4f6ad4af-83bf-4299-87ef-9f9820b8f369"],

Cell[BoxData[
 TemplateBox[{
  "NIntegrate", "ncvb", 
   "\"NIntegrate failed to converge to prescribed accuracy after \
\\!\\(\\*RowBox[{\\\"9\\\"}]\\) recursive bisections in \
\\!\\(\\*RowBox[{\\\"r\\\"}]\\) near \\!\\(\\*RowBox[{\\\"{\\\", \\\"r\\\", \
\\\"}\\\"}]\\) = \\!\\(\\*RowBox[{\\\"{\\\", \
\\\"1.00000001793518215981500002268375355655993796943903362262062728405`65.\
954589770191\\\", \\\"}\\\"}]\\). NIntegrate obtained \
\\!\\(\\*RowBox[{\\\"-\\\", \\\"1.6479873021779667`*^-17\\\"}]\\) and \
\\!\\(\\*RowBox[{\\\"1.2685243623062976`*^-13\\\"}]\\) for the integral and \
error estimates.\"", 2, 120, 68, 32768233118347298895, "Local"},
  "MessageTemplate"]], "Message", "MSG",
 CellChangeTimes->{{3.8866580063942924`*^9, 3.8866580173802977`*^9}, {
   3.8866580506604357`*^9, 3.886658069980263*^9}, 3.8866581777046127`*^9, 
   3.886825851596228*^9, 3.886840563378843*^9, 3.8868417474298306`*^9, 
   3.886842538781741*^9, 3.88684328232364*^9, 3.886843609595419*^9, 
   3.8868446257478805`*^9, 3.8868447995761657`*^9, 3.8868451151408443`*^9, 
   3.886845305572522*^9, 3.886845375594508*^9, 3.886845609678694*^9, 
   3.8868458512254734`*^9, 3.8868461418968105`*^9, 3.8868462002868524`*^9, 
   3.886846598681249*^9, 3.8868467230438814`*^9, 3.8868482289347672`*^9, {
   3.886848289476856*^9, 3.8868483205762076`*^9}, 3.8868488437822638`*^9, 
   3.886848902293506*^9, 3.8868490098174653`*^9, 3.886849657627902*^9, 
   3.8868497821671495`*^9, 3.8870847552050915`*^9, 3.8870851072406406`*^9, 
   3.88708847657008*^9, 3.887091187524126*^9, 3.887092370454877*^9, 
   3.887098045553253*^9, 3.887100359243473*^9, 3.8871927302805223`*^9, 
   3.8871929848090553`*^9, 3.8871930803928022`*^9, 3.8871936067026405`*^9, 
   3.887194170860731*^9, 3.887194336872016*^9, 3.8871944692744737`*^9, 
   3.887194686107586*^9, 3.8872553110815797`*^9, {3.8872554645851*^9, 
   3.8872554825648046`*^9}, 3.887255873449281*^9, {3.88725598372371*^9, 
   3.8872560074987097`*^9}, 3.887256074271657*^9, 3.8872561931131954`*^9, 
   3.887256448116213*^9, 3.8872565256358185`*^9, 3.8872565819598475`*^9, 
   3.8872566544570036`*^9, 3.8872568885510263`*^9, 3.887256985317211*^9, 
   3.887257207252524*^9, 3.8872573238416405`*^9, 3.8872577452466016`*^9, 
   3.8872585037248745`*^9, 3.8872585346875296`*^9, 3.8872586284801197`*^9, 
   3.88726073023528*^9, 3.8872609301614375`*^9, 3.8872612567462482`*^9, 
   3.8872627897438903`*^9, 3.8872628433120213`*^9, 3.8872630080500607`*^9, 
   3.887263158947356*^9, 3.8872639686218343`*^9, 3.88726443044263*^9, 
   3.8872723591427984`*^9, 3.8872724342466516`*^9, 3.887272778059597*^9, 
   3.887276432775436*^9, 3.8872767644366407`*^9, 3.887361760545535*^9, 
   3.887367059896857*^9, 3.8873673815348406`*^9, 3.8873677076573114`*^9, 
   3.887367853814427*^9, 3.8873691356336813`*^9, 3.8873693381840677`*^9, 
   3.8873717454655466`*^9, 3.8873718575595474`*^9, {3.8873719223545947`*^9, 
   3.8873719483530693`*^9}, 3.8873720857676983`*^9, 3.8873721372899632`*^9, 
   3.887450637171606*^9, 3.887450759276091*^9, 3.8874509936436434`*^9, 
   3.8874510947238894`*^9, 3.887451255492584*^9, 3.887451300192728*^9, 
   3.8874513630233927`*^9, 3.887453919903736*^9, 3.887454054364539*^9, 
   3.887454182218364*^9, 3.887454258849715*^9, 3.8877060957208757`*^9, 
   3.8877062198395576`*^9, {3.88770628063596*^9, 3.887706304464589*^9}, 
   3.887706473136852*^9, 3.8877065753538055`*^9, 3.8877066286119556`*^9},
 CellLabel->
  "During evaluation of \
In[116]:=",ExpressionUUID->"f53602aa-e4bc-494f-963e-5d199d5705fb"],

Cell[BoxData[
 TemplateBox[{
  "General", "stop", 
   "\"Further output of \\!\\(\\*StyleBox[RowBox[{\\\"NIntegrate\\\", \
\\\"::\\\", \\\"ncvb\\\"}], \\\"MessageName\\\"]\\) will be suppressed during \
this calculation.\"", 2, 120, 69, 32768233118347298895, "Local"},
  "MessageTemplate"]], "Message", "MSG",
 CellChangeTimes->{{3.8866580063942924`*^9, 3.8866580173802977`*^9}, {
   3.8866580506604357`*^9, 3.886658069980263*^9}, 3.8866581777046127`*^9, 
   3.886825851596228*^9, 3.886840563378843*^9, 3.8868417474298306`*^9, 
   3.886842538781741*^9, 3.88684328232364*^9, 3.886843609595419*^9, 
   3.8868446257478805`*^9, 3.8868447995761657`*^9, 3.8868451151408443`*^9, 
   3.886845305572522*^9, 3.886845375594508*^9, 3.886845609678694*^9, 
   3.8868458512254734`*^9, 3.8868461418968105`*^9, 3.8868462002868524`*^9, 
   3.886846598681249*^9, 3.8868467230438814`*^9, 3.8868482289347672`*^9, {
   3.886848289476856*^9, 3.8868483205762076`*^9}, 3.8868488437822638`*^9, 
   3.886848902293506*^9, 3.8868490098174653`*^9, 3.886849657627902*^9, 
   3.8868497821671495`*^9, 3.8870847552050915`*^9, 3.8870851072406406`*^9, 
   3.88708847657008*^9, 3.887091187524126*^9, 3.887092370454877*^9, 
   3.887098045553253*^9, 3.887100359243473*^9, 3.8871927302805223`*^9, 
   3.8871929848090553`*^9, 3.8871930803928022`*^9, 3.8871936067026405`*^9, 
   3.887194170860731*^9, 3.887194336872016*^9, 3.8871944692744737`*^9, 
   3.887194686107586*^9, 3.8872553110815797`*^9, {3.8872554645851*^9, 
   3.8872554825648046`*^9}, 3.887255873449281*^9, {3.88725598372371*^9, 
   3.8872560074987097`*^9}, 3.887256074271657*^9, 3.8872561931131954`*^9, 
   3.887256448116213*^9, 3.8872565256358185`*^9, 3.8872565819598475`*^9, 
   3.8872566544570036`*^9, 3.8872568885510263`*^9, 3.887256985317211*^9, 
   3.887257207252524*^9, 3.8872573238416405`*^9, 3.8872577452466016`*^9, 
   3.8872585037248745`*^9, 3.8872585346875296`*^9, 3.8872586284801197`*^9, 
   3.88726073023528*^9, 3.8872609301614375`*^9, 3.8872612567462482`*^9, 
   3.8872627897438903`*^9, 3.8872628433120213`*^9, 3.8872630080500607`*^9, 
   3.887263158947356*^9, 3.8872639686218343`*^9, 3.88726443044263*^9, 
   3.8872723591427984`*^9, 3.8872724342466516`*^9, 3.887272778059597*^9, 
   3.887276432775436*^9, 3.8872767644366407`*^9, 3.887361760545535*^9, 
   3.887367059896857*^9, 3.8873673815348406`*^9, 3.8873677076573114`*^9, 
   3.887367853814427*^9, 3.8873691356336813`*^9, 3.8873693381840677`*^9, 
   3.8873717454655466`*^9, 3.8873718575595474`*^9, {3.8873719223545947`*^9, 
   3.8873719483530693`*^9}, 3.8873720857676983`*^9, 3.8873721372899632`*^9, 
   3.887450637171606*^9, 3.887450759276091*^9, 3.8874509936436434`*^9, 
   3.8874510947238894`*^9, 3.887451255492584*^9, 3.887451300192728*^9, 
   3.8874513630233927`*^9, 3.887453919903736*^9, 3.887454054364539*^9, 
   3.887454182218364*^9, 3.887454258849715*^9, 3.8877060957208757`*^9, 
   3.8877062198395576`*^9, {3.88770628063596*^9, 3.887706304464589*^9}, 
   3.887706473136852*^9, 3.8877065753538055`*^9, 3.887706628620805*^9},
 CellLabel->
  "During evaluation of \
In[116]:=",ExpressionUUID->"6a0a8634-7417-4e06-83bd-e61b5ee5cd27"],

Cell[BoxData["0.73345907200430097188281231718833384465`20."], "Output",
 CellChangeTimes->{
  3.8866580175000224`*^9, {3.8866580507909994`*^9, 3.8866580701100674`*^9}, 
   3.8866581778501835`*^9, 3.886825851706375*^9, 3.8868405634730644`*^9, 
   3.886841749198082*^9, 3.8868425396311502`*^9, 3.886843282732366*^9, 
   3.886843609768137*^9, 3.886844625936274*^9, 3.886844802046478*^9, 
   3.88684511592577*^9, 3.886845305729408*^9, 3.8868453757828875`*^9, 
   3.886845609823207*^9, 3.8868458525748763`*^9, 3.8868461433562775`*^9, 
   3.8868462014480658`*^9, 3.886846598806678*^9, 3.8868467241899424`*^9, 
   3.8868482295785217`*^9, {3.886848290120084*^9, 3.8868483218784013`*^9}, 
   3.8868488448653803`*^9, 3.886848903910112*^9, 3.886849010946934*^9, 
   3.8868496922132444`*^9, 3.886849783706623*^9, 3.8870847554377327`*^9, 
   3.8870851074498973`*^9, 3.8870884774316006`*^9, 3.887091188485342*^9, 
   3.8870923722183523`*^9, 3.887098046135919*^9, 3.887100361058503*^9, 
   3.887192732006702*^9, 3.887192984971154*^9, 3.887193082829148*^9, 
   3.887193695515848*^9, 3.8871941725780387`*^9, 3.887194338677754*^9, 
   3.887194470855298*^9, 3.8871946862674294`*^9, 3.887255311276614*^9, {
   3.887255464706358*^9, 3.887255483426487*^9}, 3.8872558735321064`*^9, {
   3.887255984142496*^9, 3.8872560076626773`*^9}, 3.8872560746138115`*^9, 
   3.887256193442733*^9, 3.8872564482536106`*^9, 3.8872565264315805`*^9, 
   3.887256582194249*^9, 3.8872566552832212`*^9, 3.8872568886867604`*^9, 
   3.8872569859727144`*^9, 3.887257207452623*^9, 3.8872573246540155`*^9, 
   3.8872577464402065`*^9, 3.887258505463546*^9, 3.8872585371314983`*^9, 
   3.8872586306741314`*^9, 3.8872607312582626`*^9, 3.887260931177808*^9, 
   3.887261258955494*^9, 3.8872627898426814`*^9, 3.8872628435148954`*^9, 
   3.8872630082768545`*^9, 3.8872631591925077`*^9, 3.887263970849141*^9, 
   3.8872644306279297`*^9, 3.887272359224022*^9, 3.8872724365879827`*^9, 
   3.8872727782554693`*^9, 3.887276433846572*^9, 3.887276766345956*^9, 
   3.887361763075674*^9, 3.887367062039559*^9, 3.887367383493804*^9, 
   3.887367709620093*^9, 3.887367855693599*^9, 3.8873691357678394`*^9, 
   3.8873693383843565`*^9, 3.88737174560743*^9, 3.8873718576813335`*^9, {
   3.8873719224754634`*^9, 3.8873719486088033`*^9}, 3.887372086002598*^9, 
   3.8873721375287127`*^9, 3.8874506380837774`*^9, 3.8874507601815615`*^9, 
   3.887450994643814*^9, 3.887451095845997*^9, 3.8874512568949594`*^9, 
   3.887451301565941*^9, 3.887451364349122*^9, 3.8874539214320164`*^9, 
   3.8874540557703943`*^9, 3.887454183378578*^9, 3.887454259974619*^9, 
   3.887706095973894*^9, 3.8877062200249243`*^9, {3.887706280800083*^9, 
   3.8877063046950827`*^9}, 3.8877064732706633`*^9, 3.8877065755298586`*^9, 
   3.8877066286298294`*^9},
 CellLabel->
  "Out[120]=",ExpressionUUID->"2bb6faf7-6b7d-4f85-b3ed-d58b1d0e41c5"]
}, Open  ]],

Cell[BoxData[
 RowBox[{"(*", 
  RowBox[{
   RowBox[{"Do", "[", 
    RowBox[{
     RowBox[{"Print", "[", 
      RowBox[{
       SuperscriptBox[
        RowBox[{"(", 
         FractionBox[
          RowBox[{"\[CurlyEpsilon]", "*", 
           SuperscriptBox["Wi", "2"], "*", 
           SuperscriptBox["Pz", "2"]}], "2"], ")"}], "i"], "*", 
       RowBox[{"(", 
        FractionBox["1", 
         RowBox[{"Gamma", "[", 
          RowBox[{
           RowBox[{"\[Alpha]", "*", "i"}], "+", "\[Beta]"}], "]"}]], ")"}]}], 
      "]"}], ",", 
     RowBox[{"{", 
      RowBox[{"i", ",", "0", ",", "100", ",", "1"}], "}"}]}], "]"}], 
   "\[IndentingNewLine]", 
   RowBox[{"NIntegrate", "[", 
    RowBox[{
     RowBox[{"shradi", "[", "r", "]"}], ",", 
     RowBox[{"{", 
      RowBox[{"r", ",", 
       RowBox[{"a", "*", "RR"}], ",", "RR"}], "}"}]}], "]"}]}], 
  "*)"}]], "Input",
 CellChangeTimes->{{3.8636110013270817`*^9, 3.8636110564598045`*^9}, {
  3.86361113212846*^9, 3.863611142015275*^9}, {3.8644731078683467`*^9, 
  3.864473114377428*^9}},
 CellLabel->"In[25]:=",ExpressionUUID->"b518cc96-639a-4446-ba6b-ef3c03604ebb"],

Cell[BoxData[
 RowBox[{
  RowBox[{
  "C\[AAcute]lculo", " ", "num\[EAcute]rico", " ", "do", " ", "perfil", " ", 
   "de", " ", "velocidades"}], "\[IndentingNewLine]"}]], "Input",
 CellChangeTimes->{{3.863173036153028*^9, 3.8631730469824867`*^9}},
 Background->RGBColor[
  0.87, 0.94, 1],ExpressionUUID->"98b7521f-eef3-49ad-b1e0-ff1730861371"],

Cell[CellGroupData[{

Cell[BoxData[{
 RowBox[{
  RowBox[{"b", "=", "bval"}], ";"}], "\[IndentingNewLine]", 
 RowBox[{
  RowBox[{
   RowBox[{"u", "[", "y_", "]"}], ":=", 
   RowBox[{"NIntegrate", "[", 
    RowBox[{
     RowBox[{"shradi", "[", "r", "]"}], ",", 
     RowBox[{"{", 
      RowBox[{"r", ",", 
       RowBox[{"a", "*", "RR"}], ",", "y"}], "}"}], ",", 
     RowBox[{"WorkingPrecision", "\[Rule]", "20"}], ",", 
     RowBox[{"AccuracyGoal", "\[Rule]", "20"}]}], "]"}]}], 
  ";"}], "\[IndentingNewLine]", 
 RowBox[{"Table", "[", 
  RowBox[{
   RowBox[{"{", 
    RowBox[{"i", ",", 
     RowBox[{"u", "[", "i", "]"}]}], "}"}], ",", 
   RowBox[{"{", 
    RowBox[{"i", ",", "1", ",", "2", ",", "0.01"}], "}"}]}], 
  "]"}], "\[IndentingNewLine]", 
 RowBox[{"ListPlot", "[", 
  RowBox[{"%", ",", 
   RowBox[{"Joined", "\[Rule]", "True"}]}], "]"}]}], "Input",
 CellChangeTimes->{{3.81158832576456*^9, 3.8115883386275563`*^9}, {
  3.811588371311844*^9, 3.811588399279768*^9}, {3.8115894838017597`*^9, 
  3.8115895138505526`*^9}, {3.8630777636983504`*^9, 3.863077765966136*^9}, {
  3.863078199879595*^9, 3.8630782025106926`*^9}, {3.8630783668111715`*^9, 
  3.8630783687652683`*^9}, {3.863078434422164*^9, 3.8630784597852297`*^9}, {
  3.8630792123149986`*^9, 3.863079214799992*^9}, {3.8630792999846363`*^9, 
  3.863079307179846*^9}, {3.863079348520793*^9, 3.863079365718114*^9}, {
  3.8630794786379933`*^9, 3.863079504500119*^9}, {3.8630795875121183`*^9, 
  3.86307961801931*^9}, {3.8631661351264906`*^9, 3.8631661357904277`*^9}, {
  3.863509580176388*^9, 3.86350958053528*^9}, {3.8635172593659844`*^9, 
  3.863517262855982*^9}, {3.8635173409798326`*^9, 3.863517346120393*^9}, {
  3.8880535571151943`*^9, 
  3.8880535832907677`*^9}},ExpressionUUID->"d0d78d5f-ef3b-4515-bab2-\
b39536258d5b"],

Cell[BoxData[
 RowBox[{"{", 
  RowBox[{
   RowBox[{"{", 
    RowBox[{"1.`", ",", "0"}], "}"}], ",", 
   RowBox[{"{", 
    RowBox[{"1.01`", ",", "0.00712906950372866589297893567800434122`20."}], 
    "}"}], ",", 
   RowBox[{"{", 
    RowBox[{"1.02`", ",", "0.01397427826336219088075518369342375062`20."}], 
    "}"}], ",", 
   RowBox[{"{", 
    RowBox[{"1.03`", ",", "0.0205481130302588732642849550884156407`20."}], 
    "}"}], ",", 
   RowBox[{"{", 
    RowBox[{"1.04`", ",", "0.02686214643647435160549618721134463444`20."}], 
    "}"}], ",", 
   RowBox[{"{", 
    RowBox[{"1.05`", ",", "0.03292711830328685065327917708281783431`20."}], 
    "}"}], ",", 
   RowBox[{"{", 
    RowBox[{"1.06`", ",", "0.03875300834574913853500635141938044825`20."}], 
    "}"}], ",", 
   RowBox[{"{", 
    RowBox[{"1.07`", ",", "0.04434910131235596462915913396077317037`20."}], 
    "}"}], ",", 
   RowBox[{"{", 
    RowBox[{"1.08`", ",", "0.0497240454587144597800882331827112841`20."}], 
    "}"}], ",", 
   RowBox[{"{", 
    RowBox[{"1.09`", ",", "0.05488590513469061011562427949570726981`20."}], 
    "}"}], ",", 
   RowBox[{"{", 
    RowBox[{"1.1`", ",", "0.05984220816253206869560870251464347466`20."}], 
    "}"}], ",", 
   RowBox[{"{", 
    RowBox[{"1.11`", ",", "0.06459998859616967512021274738782530963`20."}], 
    "}"}], ",", 
   RowBox[{"{", 
    RowBox[{"1.12`", ",", "0.0691658253769825239827460878804071121`20."}], 
    "}"}], ",", 
   RowBox[{"{", 
    RowBox[{"1.13`", ",", "0.07354587733686562287095720696463701951`20."}], 
    "}"}], ",", 
   RowBox[{"{", 
    RowBox[{
    "1.1400000000000001`", ",", 
     "0.07774591494387422645248999654059551297`20."}], "}"}], ",", 
   RowBox[{"{", 
    RowBox[{"1.15`", ",", "0.08177134913769919216128742566243564515`20."}], 
    "}"}], ",", 
   RowBox[{"{", 
    RowBox[{"1.16`", ",", "0.08562725756064913769099547904850912887`20."}], 
    "}"}], ",", 
   RowBox[{"{", 
    RowBox[{"1.17`", ",", "0.08931840845371624540468577282690536521`20."}], 
    "}"}], ",", 
   RowBox[{"{", 
    RowBox[{"1.18`", ",", "0.09284928245592392102821559386560183592`20."}], 
    "}"}], ",", 
   RowBox[{"{", 
    RowBox[{"1.19`", ",", "0.09622409251779691157055488971900171362`20."}], 
    "}"}], ",", 
   RowBox[{"{", 
    RowBox[{"1.2`", ",", "0.09944680211591497437318094797028762154`20."}], 
    "}"}], ",", 
   RowBox[{"{", 
    RowBox[{"1.21`", ",", "0.10252114193461783935679376653270054008`20."}], 
    "}"}], ",", 
   RowBox[{"{", 
    RowBox[{"1.22`", ",", "0.1054506251626178659799127380282209017`20."}], 
    "}"}], ",", 
   RowBox[{"{", 
    RowBox[{"1.23`", ",", "0.1082385615361984352513850326541937342`20."}], 
    "}"}], ",", 
   RowBox[{"{", 
    RowBox[{"1.24`", ",", "0.11088807024653343360798730852665760834`20."}], 
    "}"}], ",", 
   RowBox[{"{", 
    RowBox[{"1.25`", ",", "0.11340209181620159042909942008902695338`20."}], 
    "}"}], ",", 
   RowBox[{"{", 
    RowBox[{"1.26`", ",", "0.11578339903897053542700754064157567121`20."}], 
    "}"}], ",", 
   RowBox[{"{", 
    RowBox[{"1.27`", ",", "0.11803460706720153827150729386554649134`20."}], 
    "}"}], ",", 
   RowBox[{"{", 
    RowBox[{"1.28`", ",", "0.12015818272261533090642441474477232846`20."}], 
    "}"}], ",", 
   RowBox[{"{", 
    RowBox[{"1.29`", ",", "0.12215645309852272065694410003330709875`20."}], 
    "}"}], ",", 
   RowBox[{"{", 
    RowBox[{"1.3`", ",", "0.12403161351484031913273793305655955255`20."}], 
    "}"}], ",", 
   RowBox[{"{", 
    RowBox[{"1.31`", ",", "0.12578573488117723722021137874505511523`20."}], 
    "}"}], ",", 
   RowBox[{"{", 
    RowBox[{"1.32`", ",", "0.12742077051790246316999213098159168396`20."}], 
    "}"}], ",", 
   RowBox[{"{", 
    RowBox[{"1.33`", ",", "0.12893856248030614646957638149313174084`20."}], 
    "}"}], ",", 
   RowBox[{"{", 
    RowBox[{"1.34`", ",", "0.13034084742668264894963130578767451659`20."}], 
    "}"}], ",", 
   RowBox[{"{", 
    RowBox[{"1.35`", ",", "0.13162926206732926417871451826947528494`20."}], 
    "}"}], ",", 
   RowBox[{"{", 
    RowBox[{
    "1.3599999999999999`", ",", 
     "0.1328053482280197597696118513437843959`20."}], "}"}], ",", 
   RowBox[{"{", 
    RowBox[{"1.37`", ",", "0.13387055755843098625047219966972889373`20."}], 
    "}"}], ",", 
   RowBox[{"{", 
    RowBox[{"1.38`", ",", "0.13482625591323261084868436568302228987`20."}], 
    "}"}], ",", 
   RowBox[{"{", 
    RowBox[{
    "1.3900000000000001`", ",", 
     "0.13567372743106269149185423929918858146`20."}], "}"}], ",", 
   RowBox[{"{", 
    RowBox[{"1.4`", ",", "0.13641417833436835135516010743310719334`20."}], 
    "}"}], ",", 
   RowBox[{"{", 
    RowBox[{
    "1.4100000000000001`", ",", 
     "0.13704874047107295656257110953849260138`20."}], "}"}], ",", 
   RowBox[{"{", 
    RowBox[{"1.42`", ",", "0.13757847461720492114060503653226993221`20."}], 
    "}"}], ",", 
   RowBox[{"{", 
    RowBox[{"1.43`", ",", "0.13800437355797743830073469904728655679`20."}], 
    "}"}], ",", 
   RowBox[{"{", 
    RowBox[{"1.44`", ",", "0.13832736496331550745213164932616618188`20."}], 
    "}"}], ",", 
   RowBox[{"{", 
    RowBox[{"1.45`", ",", "0.13854831407247755936265742179358359354`20."}], 
    "}"}], ",", 
   RowBox[{"{", 
    RowBox[{"1.46`", ",", "0.13866802620119357697361915750600630624`20."}], 
    "}"}], ",", 
   RowBox[{"{", 
    RowBox[{"1.47`", ",", "0.13868724908363043964265154385026703576`20."}], 
    "}"}], ",", 
   RowBox[{"{", 
    RowBox[{"1.48`", ",", "0.13860667506048504893263047166221484003`20."}], 
    "}"}], ",", 
   RowBox[{"{", 
    RowBox[{"1.49`", ",", "0.13842694312358698898122868382196251749`20."}], 
    "}"}], ",", 
   RowBox[{"{", 
    RowBox[{"1.5`", ",", "0.13814864082655579162943707588257071613`20."}], 
    "}"}], ",", 
   RowBox[{"{", 
    RowBox[{"1.51`", ",", "0.13777230607029520459398289633174794522`20."}], 
    "}"}], ",", 
   RowBox[{"{", 
    RowBox[{"1.52`", ",", "0.13729842877141094897871707036446960139`20."}], 
    "}"}], ",", 
   RowBox[{"{", 
    RowBox[{"1.53`", ",", "0.13672745242100282111457264411298599188`20."}], 
    "}"}], ",", 
   RowBox[{"{", 
    RowBox[{"1.54`", ",", "0.1360597755407008470093802691970288347`20."}], 
    "}"}], ",", 
   RowBox[{"{", 
    RowBox[{"1.55`", ",", "0.13529575304228334483395915747806871978`20."}], 
    "}"}], ",", 
   RowBox[{"{", 
    RowBox[{"1.56`", ",", "0.13443569749672753816599883712081308534`20."}], 
    "}"}], ",", 
   RowBox[{"{", 
    RowBox[{"1.57`", ",", "0.1334798803180966134486846656903540591`20."}], 
    "}"}], ",", 
   RowBox[{"{", 
    RowBox[{"1.58`", ",", "0.13242853286725707672531606467223529566`20."}], 
    "}"}], ",", 
   RowBox[{"{", 
    RowBox[{
    "1.5899999999999999`", ",", 
     "0.13128184748004358869048926545910270179`20."}], "}"}], ",", 
   RowBox[{"{", 
    RowBox[{"1.6`", ",", "0.13003997842414183971168767030076070496`20."}], 
    "}"}], ",", 
   RowBox[{"{", 
    RowBox[{
    "1.6099999999999999`", ",", 
     "0.1287030427886419533996887443533006332`20."}], "}"}], ",", 
   RowBox[{"{", 
    RowBox[{"1.62`", ",", "0.12727112130991941862417037971426874319`20."}], 
    "}"}], ",", 
   RowBox[{"{", 
    RowBox[{"1.63`", ",", "0.12574425913723240172346604970985633154`20."}], 
    "}"}], ",", 
   RowBox[{"{", 
    RowBox[{
    "1.6400000000000001`", ",", 
     "0.12412246654117074637376284709181207585`20."}], "}"}], ",", 
   RowBox[{"{", 
    RowBox[{"1.65`", ",", "0.12240571956786483947129483178890338679`20."}], 
    "}"}], ",", 
   RowBox[{"{", 
    RowBox[{
    "1.6600000000000001`", ",", 
     "0.12059396064164464107519774606894917776`20."}], "}"}], ",", 
   RowBox[{"{", 
    RowBox[{"1.67`", ",", "0.1186870991186458428457674066639274908`20."}], 
    "}"}], ",", 
   RowBox[{"{", 
    RowBox[{
    "1.6800000000000002`", ",", 
     "0.11668501179367207605949958613251775813`20."}], "}"}], ",", 
   RowBox[{"{", 
    RowBox[{"1.69`", ",", "0.11458754336245708120516787368513063169`20."}], 
    "}"}], ",", 
   RowBox[{"{", 
    RowBox[{
    "1.7000000000000002`", ",", 
     "0.11239450684130759676010697211645657611`20."}], "}"}], ",", 
   RowBox[{"{", 
    RowBox[{"1.71`", ",", "0.11010568394596654395199828656222396323`20."}], 
    "}"}], ",", 
   RowBox[{"{", 
    RowBox[{"1.72`", ",", "0.10772082543139378056877671662199430955`20."}], 
    "}"}], ",", 
   RowBox[{"{", 
    RowBox[{"1.73`", ",", "0.10523965139404018857423898850097729096`20."}], 
    "}"}], ",", 
   RowBox[{"{", 
    RowBox[{"1.74`", ",", "0.1026618515380674731123546337877643793`20."}], 
    "}"}], ",", 
   RowBox[{"{", 
    RowBox[{"1.75`", ",", "0.09998708540685849257959160496744886919`20."}], 
    "}"}], ",", 
   RowBox[{"{", 
    RowBox[{"1.76`", ",", "0.09721498258105802773220600810871529378`20."}], 
    "}"}], ",", 
   RowBox[{"{", 
    RowBox[{"1.77`", ",", "0.09434514284428746876732831759084281051`20."}], 
    "}"}], ",", 
   RowBox[{"{", 
    RowBox[{"1.78`", ",", "0.09137713631758612857922460821023157146`20."}], 
    "}"}], ",", 
   RowBox[{"{", 
    RowBox[{"1.79`", ",", "0.08831050356354678088035645732056457775`20."}], 
    "}"}], ",", 
   RowBox[{"{", 
    RowBox[{"1.8`", ",", "0.08514475566103307012974692447814511115`20."}], 
    "}"}], ",", 
   RowBox[{"{", 
    RowBox[{"1.81`", ",", "0.0818793742512912296856957154656368127`20."}], 
    "}"}], ",", 
   RowBox[{"{", 
    RowBox[{"1.82`", ",", "0.07851381155619769250290397985319957448`20."}], 
    "}"}], ",", 
   RowBox[{"{", 
    RowBox[{"1.83`", ",", "0.07504749036931733290383620965905310166`20."}], 
    "}"}], ",", 
   RowBox[{"{", 
    RowBox[{
    "1.8399999999999999`", ",", 
     "0.07147980402038399458772086159836508123`20."}], "}"}], ",", 
   RowBox[{"{", 
    RowBox[{"1.85`", ",", "0.06781011631375453675640516688390437072`20."}], 
    "}"}], ",", 
   RowBox[{"{", 
    RowBox[{
    "1.8599999999999999`", ",", 
     "0.06403776144133329187119354417347817603`20."}], "}"}], ",", 
   RowBox[{"{", 
    RowBox[{"1.87`", ",", "0.06016204387040482947904398995491077572`20."}], 
    "}"}], ",", 
   RowBox[{"{", 
    RowBox[{"1.88`", ",", "0.05618223820676980880242574318819814202`20."}], 
    "}"}], ",", 
   RowBox[{"{", 
    RowBox[{
    "1.8900000000000001`", ",", 
     "0.05209758903351992818134724292451747838`20."}], "}"}], ",", 
   RowBox[{"{", 
    RowBox[{"1.9`", ",", "0.04790731072575216682582130102387012294`20."}], 
    "}"}], ",", 
   RowBox[{"{", 
    RowBox[{
    "1.9100000000000001`", ",", 
     "0.04361058724146675152297264373840292715`20."}], "}"}], ",", 
   RowBox[{"{", 
    RowBox[{"1.92`", ",", "0.03920657188886198033409712211969001406`20."}], 
    "}"}], ",", 
   RowBox[{"{", 
    RowBox[{
    "1.9300000000000002`", ",", 
     "0.03469438707018618403623496621472219397`20."}], "}"}], ",", 
   RowBox[{"{", 
    RowBox[{"1.94`", ",", "0.03007312400227960026154419887807229575`20."}], 
    "}"}], ",", 
   RowBox[{"{", 
    RowBox[{
    "1.9500000000000002`", ",", 
     "0.02534184241388838054879159364070675943`20."}], "}"}], ",", 
   RowBox[{"{", 
    RowBox[{"1.96`", ",", "0.02049957021980868347340694656689499069`20."}], 
    "}"}], ",", 
   RowBox[{"{", 
    RowBox[{"1.97`", ",", "0.01554530317187012161168163340088685225`20."}], 
    "}"}], ",", 
   RowBox[{"{", 
    RowBox[{"1.98`", ",", "0.01047800448674542684281584485915993947`20."}], 
    "}"}], ",", 
   RowBox[{"{", 
    RowBox[{"1.99`", ",", "0.00529660445052891652203852665945501634`20."}], 
    "}"}], ",", 
   RowBox[{"{", 
    RowBox[{"2.`", ",", 
     RowBox[{"-", "2.8793552335834272765648524179338445605611`20.*^-18"}]}], 
    "}"}]}], "}"}]], "Output",
 CellChangeTimes->{
  3.887098053030575*^9, 3.8871927430169067`*^9, 3.8871929914434476`*^9, 
   3.8871931031696277`*^9, 3.8871939668222713`*^9, 3.8871941985879903`*^9, 
   3.8871943715947094`*^9, 3.887194496502485*^9, 3.8871946912681007`*^9, 
   3.887255319336461*^9, 3.8872554912589593`*^9, 3.8872558793546963`*^9, {
   3.88725618743258*^9, 3.8872561993844337`*^9}, 3.887256453593983*^9, 
   3.887258584649977*^9, 3.8872586664638596`*^9, 3.8872607469007077`*^9, 
   3.8872609557681603`*^9, 3.8872628492116613`*^9, 3.887263018876254*^9, 
   3.887263166315428*^9, 3.887361787258478*^9, 3.8873670782991967`*^9, 
   3.8873673962053013`*^9, 3.8873677277380943`*^9, 3.887367871064061*^9, 
   3.887371926668476*^9, 3.8873719582032623`*^9, 3.887372141594085*^9, 
   3.8874507670005484`*^9, 3.887451308744645*^9, 3.8877061029535127`*^9, {
   3.887706284595317*^9, 3.8877063099955196`*^9}, 3.8877064767943935`*^9, 
   3.887706581641095*^9, 3.887706633858643*^9},
 CellLabel->
  "Out[123]=",ExpressionUUID->"d89246a2-ed8c-4329-9e92-6b4f214637b6"],

Cell[BoxData[
 GraphicsBox[{{}, {{}, {}, 
    {RGBColor[0.368417, 0.506779, 0.709798], PointSize[0.009166666666666668], 
     AbsoluteThickness[1.6], LineBox[CompressedData["
1:eJw11QlMFHcUBnAk0kYELAarUAMiRkFIvVHbwIdpKGhlLYixxlUSQNtgRCyB
UigGWrdGsWKtQgFj5UyLBAqs3LAz3ASoV7urtUBBDsuhy+7swZ7dHR8vmcwk
88+X994vmfGMPhdxytbGxuaU5bLe35Qci08+wux2lbccfZv/s4vakY6IBnfR
TLgc/YztaNadq0hzqQwZTZXDL0Mqum5/CyUJAfayYjlO1/Z4MpkFGBywlhwn
Ai4xj5/fhdrbGijHtqlX75+TFcPDktbgPg9p7TdTs+IyhI6mWhLnkSn1cotP
+g3nrXEJ8yjc6Rm1xK0C+XnWmscLIxdWXFyJDpU10HK+6qj6l8u/Yzbc2uA8
kupNxmfiavDtuSiwdGTaeepJDQKtcQEKlIy42HpP1eI0XwoM/vlJjuaVGNZp
hdkKrMgcNpXP3Ac/boPlvCDgwxtDdeDbG1VAoMj/SttZDz7OXomJbxOjNxQ1
YAdfSkTn9KR+ltQIfn1CJeIM7NEngU3gxxUpoc+Km35gagLfXqUSwgF1o+h+
M/g4mRI54r3v+cS0kAOHpcvKYmbebsUbDw6Puw+s0Re3kgcHw/GNrhd3t5EH
h0mFV19Vext5cHir1nFHabCEPDh0Rtf7XmYk5MHBye3BHokrQx4q7BG4TUQc
YshDhUcvRU4rMhnyUOHIy+8+tq1iyEMFv7AXIR88Y8Cvr10F/+6qJZ1mhjxU
UPoJCu+tZ8lDDQfHiQLDPpY81PBc5VHPnmDJQ40/VkY62yWzuM4Hqi172ODz
8ApLHmrcK7s27nubJQ81tqT8mLuunCUPDZ7ERNrXiVny0KC4ce6CspklDw0G
UzvrRiQseWgw/TxXk8Gw5KGBZMv2d4ZaWfLQIPX1gHChniUPLfo8fPv/rmTJ
Q4vnk/HDoiKWPLQI6aqsMd1gyUOLq1cENvszWPLQYq7fw+OLOJY8tKg6FrYs
KpwlDy1WT7uc3LqLJY8F1CjCY4dXseSxgM74fxzOKBnwcQkLuLW2jZMNLnpY
3l8J+nxj6aLHAno8pVFHv170WECE379ZZw4w5KFDbvPhgzFrGPLQYfe+C/Hp
3RLy0OHpppjt+iMS8tCh2sFxLnCkjTx08OF8XUOi2zDGe+iQEpFT6jzSSh56
jAuCNQVHWrGT99CjcfP6mbGuFvLQo/dRmWxsSwt56LHzy8PXcn9qJg897GQ6
oUHeRB56nHSfcnIIbSIPA4aDn84xPzeShwFe00PtLi8ayMOAyDRHmc2mBvIw
wOT0LpceW08eBhSN1MReLKgjDwN6Eo3c8oH75GHA/vC7iuVqMXkYcdNxxi/N
VUweRvSk9HKH/GvJwwhZdu7ajIM15GHE64dTGhthNXkY8Ve66/Ge2MXvlRGR
2Z27sgcrycMEj7Kzq2c6KsjDhNrJ7baXK8rJw4TMsdt5gku/kocJXR/Npq2L
LCMPE/xc3ILGVpaQhwmhySWJyR2F5GFG6N5Pt6b33yEPM2KO/bDPX5lHHmac
FYqHpcab5GGGdJs0eLc0mzzMyPq+l0tPEpGHGfLo8Pjx6qTF/0ZQfkTU+apr
B1r+Bx1BM24=
      "]]}}, {{}, {}}},
  AspectRatio->NCache[GoldenRatio^(-1), 0.6180339887498948],
  Axes->{True, True},
  AxesLabel->{None, None},
  AxesOrigin->{0.9791666666666691, 0},
  DisplayFunction->Identity,
  Frame->{{False, False}, {False, False}},
  FrameLabel->{{None, None}, {None, None}},
  FrameTicks->{{Automatic, Automatic}, {Automatic, Automatic}},
  GridLines->{None, None},
  GridLinesStyle->Directive[
    GrayLevel[0.5, 0.4]],
  Method->{
   "AxisPadding" -> Scaled[0.02], "DefaultBoundaryStyle" -> Automatic, 
    "DefaultGraphicsInteraction" -> {
     "Version" -> 1.2, "TrackMousePosition" -> {True, False}, 
      "Effects" -> {
       "Highlight" -> {"ratio" -> 2}, "HighlightPoint" -> {"ratio" -> 2}, 
        "Droplines" -> {
         "freeformCursorMode" -> True, 
          "placement" -> {"x" -> "All", "y" -> "None"}}}}, "DefaultMeshStyle" -> 
    AbsolutePointSize[6], "DefaultPlotStyle" -> {
      Directive[
       RGBColor[0.368417, 0.506779, 0.709798], 
       AbsoluteThickness[1.6]], 
      Directive[
       RGBColor[0.880722, 0.611041, 0.142051], 
       AbsoluteThickness[1.6]], 
      Directive[
       RGBColor[0.560181, 0.691569, 0.194885], 
       AbsoluteThickness[1.6]], 
      Directive[
       RGBColor[0.922526, 0.385626, 0.209179], 
       AbsoluteThickness[1.6]], 
      Directive[
       RGBColor[0.528488, 0.470624, 0.701351], 
       AbsoluteThickness[1.6]], 
      Directive[
       RGBColor[0.772079, 0.431554, 0.102387], 
       AbsoluteThickness[1.6]], 
      Directive[
       RGBColor[0.363898, 0.618501, 0.782349], 
       AbsoluteThickness[1.6]], 
      Directive[
       RGBColor[1, 0.75, 0], 
       AbsoluteThickness[1.6]], 
      Directive[
       RGBColor[0.647624, 0.37816, 0.614037], 
       AbsoluteThickness[1.6]], 
      Directive[
       RGBColor[0.571589, 0.586483, 0.], 
       AbsoluteThickness[1.6]], 
      Directive[
       RGBColor[0.915, 0.3325, 0.2125], 
       AbsoluteThickness[1.6]], 
      Directive[
       RGBColor[0.40082222609352647`, 0.5220066643438841, 0.85], 
       AbsoluteThickness[1.6]], 
      Directive[
       RGBColor[0.9728288904374106, 0.621644452187053, 0.07336199581899142], 
       AbsoluteThickness[1.6]], 
      Directive[
       RGBColor[0.736782672705901, 0.358, 0.5030266573755369], 
       AbsoluteThickness[1.6]], 
      Directive[
       RGBColor[0.28026441037696703`, 0.715, 0.4292089322474965], 
       AbsoluteThickness[1.6]]}, "DomainPadding" -> Scaled[0.02], 
    "PointSizeFunction" -> "SmallPointSize", "RangePadding" -> Scaled[0.05], 
    "OptimizePlotMarkers" -> True, "OptimizePlotMarkers" -> True, 
    "CoordinatesToolOptions" -> {"DisplayFunction" -> ({
        Identity[
         Part[#, 1]], 
        Identity[
         Part[#, 2]]}& ), "CopiedValueFunction" -> ({
        Identity[
         Part[#, 1]], 
        Identity[
         Part[#, 2]]}& )}},
  PlotRange->{{0.9791666666666691, 2.}, {-2.8793552335834272`*^-18, 
   0.13868724908363045`}},
  PlotRangeClipping->True,
  PlotRangePadding->{{
     Scaled[0.02], 
     Scaled[0.02]}, {
     Scaled[0.05], 
     Scaled[0.05]}},
  Ticks->{Automatic, Automatic}]], "Output",
 CellChangeTimes->{
  3.887098053030575*^9, 3.8871927430169067`*^9, 3.8871929914434476`*^9, 
   3.8871931031696277`*^9, 3.8871939668222713`*^9, 3.8871941985879903`*^9, 
   3.8871943715947094`*^9, 3.887194496502485*^9, 3.8871946912681007`*^9, 
   3.887255319336461*^9, 3.8872554912589593`*^9, 3.8872558793546963`*^9, {
   3.88725618743258*^9, 3.8872561993844337`*^9}, 3.887256453593983*^9, 
   3.887258584649977*^9, 3.8872586664638596`*^9, 3.8872607469007077`*^9, 
   3.8872609557681603`*^9, 3.8872628492116613`*^9, 3.887263018876254*^9, 
   3.887263166315428*^9, 3.887361787258478*^9, 3.8873670782991967`*^9, 
   3.8873673962053013`*^9, 3.8873677277380943`*^9, 3.887367871064061*^9, 
   3.887371926668476*^9, 3.8873719582032623`*^9, 3.887372141594085*^9, 
   3.8874507670005484`*^9, 3.887451308744645*^9, 3.8877061029535127`*^9, {
   3.887706284595317*^9, 3.8877063099955196`*^9}, 3.8877064767943935`*^9, 
   3.887706581641095*^9, 3.887706633898682*^9},
 CellLabel->
  "Out[124]=",ExpressionUUID->"dbdecd08-701a-4feb-bf01-315c1414dbe8"],

Cell[BoxData["$Aborted"], "Output",
 CellChangeTimes->{
  3.887098053030575*^9, 3.8871927430169067`*^9, 3.8871929914434476`*^9, 
   3.8871931031696277`*^9, 3.8871939668222713`*^9, 3.8871941985879903`*^9, 
   3.8871943715947094`*^9, 3.887194496502485*^9, 3.8871946912681007`*^9, 
   3.887255319336461*^9, 3.8872554912589593`*^9, 3.8872558793546963`*^9, {
   3.88725618743258*^9, 3.8872561993844337`*^9}, 3.887256453593983*^9, 
   3.887258584649977*^9, 3.8872586664638596`*^9, 3.8872607469007077`*^9, 
   3.8872609557681603`*^9, 3.8872628492116613`*^9, 3.887263018876254*^9, 
   3.887263166315428*^9, 3.887361787258478*^9, 3.8873670782991967`*^9, 
   3.8873673962053013`*^9, 3.8873677277380943`*^9, 3.887367871064061*^9, 
   3.887371926668476*^9, 3.8873719582032623`*^9, 3.887372141594085*^9, 
   3.8874507670005484`*^9, 3.887451308744645*^9, 3.8877061029535127`*^9, {
   3.887706284595317*^9, 3.8877063099955196`*^9}, 3.8877064767943935`*^9, 
   3.887706581641095*^9, 3.887706633858643*^9, 3.8880535793876305`*^9},
 CellLabel->
  "Out[140]=",ExpressionUUID->"5815d544-980c-46c5-af2a-4df8bf1f94d4"],

Cell[BoxData[
 TemplateBox[{
  "ListPlot", "lpn", 
   "\"\\!\\(\\*RowBox[{\\\"$Aborted\\\"}]\\) is not a list of numbers or \
pairs of numbers.\"", 2, 141, 99, 32770495125862452421, "Local"},
  "MessageTemplate"]], "Message", "MSG",
 CellChangeTimes->{3.888053579491172*^9},
 CellLabel->
  "During evaluation of \
In[138]:=",ExpressionUUID->"54667d58-7ee2-414b-a356-e7a23c4c3fef"],

Cell[BoxData[
 RowBox[{"ListPlot", "[", 
  RowBox[{"$Aborted", ",", 
   RowBox[{"Joined", "\[Rule]", "True"}]}], "]"}]], "Output",
 CellChangeTimes->{
  3.887098053030575*^9, 3.8871927430169067`*^9, 3.8871929914434476`*^9, 
   3.8871931031696277`*^9, 3.8871939668222713`*^9, 3.8871941985879903`*^9, 
   3.8871943715947094`*^9, 3.887194496502485*^9, 3.8871946912681007`*^9, 
   3.887255319336461*^9, 3.8872554912589593`*^9, 3.8872558793546963`*^9, {
   3.88725618743258*^9, 3.8872561993844337`*^9}, 3.887256453593983*^9, 
   3.887258584649977*^9, 3.8872586664638596`*^9, 3.8872607469007077`*^9, 
   3.8872609557681603`*^9, 3.8872628492116613`*^9, 3.887263018876254*^9, 
   3.887263166315428*^9, 3.887361787258478*^9, 3.8873670782991967`*^9, 
   3.8873673962053013`*^9, 3.8873677277380943`*^9, 3.887367871064061*^9, 
   3.887371926668476*^9, 3.8873719582032623`*^9, 3.887372141594085*^9, 
   3.8874507670005484`*^9, 3.887451308744645*^9, 3.8877061029535127`*^9, {
   3.887706284595317*^9, 3.8877063099955196`*^9}, 3.8877064767943935`*^9, 
   3.887706581641095*^9, 3.887706633858643*^9, 3.8880535795027237`*^9},
 CellLabel->
  "Out[141]=",ExpressionUUID->"6c963088-5671-49fa-a775-8a3fdf9304d0"]
}, Open  ]],

Cell[CellGroupData[{

Cell[BoxData[
 RowBox[{"\[IndentingNewLine]", 
  RowBox[{"Do", "[", 
   RowBox[{
    RowBox[{"Print", "[", 
     RowBox[{"u", "[", "i", "]"}], "]"}], ",", 
    RowBox[{"{", 
     RowBox[{"i", ",", "1", ",", "2", ",", "0.01"}], "}"}]}], 
   "]"}]}]], "Input",
 CellChangeTimes->{{3.886840607530915*^9, 3.886840609276329*^9}},
 CellLabel->
  "In[315]:=",ExpressionUUID->"9921f906-68e5-4300-b35e-c472cef55330"],

Cell[BoxData[
 TemplateBox[{
  "NIntegrate", "precw", 
   "\"The precision of the argument function (\\!\\(\\*RowBox[{FractionBox[\\\
\"1\\\", \\\"2\\\"], \\\" \\\", RowBox[{\\\"(\\\", \
RowBox[{FractionBox[\\\"2.0999418124692751562935024571548008249`19.\
69897000433602\\\", \\\"r\\\"], \\\"-\\\", \\\"r\\\"}], \\\")\\\"}], \\\" \
\\\", RowBox[{\\\"MittagLefflerE\\\", \\\"[\\\", RowBox[{\\\"1.5`\\\", \
\\\",\\\", RowBox[{FractionBox[\\\"5\\\", \\\"2\\\"], \\\" \\\", \
SuperscriptBox[RowBox[{\\\"(\\\", \
RowBox[{FractionBox[\\\"2.0999418124692751562935024571548008249`19.\
69897000433602\\\", \\\"r\\\"], \\\"-\\\", \\\"r\\\"}], \\\")\\\"}], \
\\\"2\\\"]}]}], \\\"]\\\"}]}]\\)) is less than WorkingPrecision \
(\\!\\(\\*RowBox[{\\\"20.`\\\"}]\\)).\"", 2, 315, 134, 32764161059608508428, 
   "Local"},
  "MessageTemplate"]], "Message", "MSG",
 CellChangeTimes->{3.8870980576763887`*^9},
 CellLabel->
  "During evaluation of \
In[315]:=",ExpressionUUID->"fba54687-8fa3-4d10-ab22-ac7019ed6476"],

Cell[BoxData["0"], "Print",
 CellChangeTimes->{3.8870980576873865`*^9},
 CellLabel->
  "During evaluation of \
In[315]:=",ExpressionUUID->"3a686b4f-528c-4550-81f0-e7f5889c6923"],

Cell[BoxData[
 TemplateBox[{
  "NIntegrate", "precw", 
   "\"The precision of the argument function (\\!\\(\\*RowBox[{FractionBox[\\\
\"1\\\", \\\"2\\\"], \\\" \\\", RowBox[{\\\"(\\\", \
RowBox[{FractionBox[\\\"2.0999418124692751562935024571548008249`19.\
69897000433602\\\", \\\"r\\\"], \\\"-\\\", \\\"r\\\"}], \\\")\\\"}], \\\" \
\\\", RowBox[{\\\"MittagLefflerE\\\", \\\"[\\\", RowBox[{\\\"1.5`\\\", \
\\\",\\\", RowBox[{FractionBox[\\\"5\\\", \\\"2\\\"], \\\" \\\", \
SuperscriptBox[RowBox[{\\\"(\\\", \
RowBox[{FractionBox[\\\"2.0999418124692751562935024571548008249`19.\
69897000433602\\\", \\\"r\\\"], \\\"-\\\", \\\"r\\\"}], \\\")\\\"}], \
\\\"2\\\"]}]}], \\\"]\\\"}]}]\\)) is less than WorkingPrecision \
(\\!\\(\\*RowBox[{\\\"20.`\\\"}]\\)).\"", 2, 315, 135, 32764161059608508428, 
   "Local"},
  "MessageTemplate"]], "Message", "MSG",
 CellChangeTimes->{3.8870980576904097`*^9},
 CellLabel->
  "During evaluation of \
In[315]:=",ExpressionUUID->"865f1848-2894-46b4-bfc8-b4fe9ca6939d"],

Cell[BoxData["0.02853620370403854833861643457077995837`20."], "Print",
 CellChangeTimes->{3.8870980577003746`*^9},
 CellLabel->
  "During evaluation of \
In[315]:=",ExpressionUUID->"f9aa16b4-ecd2-4328-9b79-48cb44be7e98"],

Cell[BoxData[
 TemplateBox[{
  "NIntegrate", "precw", 
   "\"The precision of the argument function (\\!\\(\\*RowBox[{FractionBox[\\\
\"1\\\", \\\"2\\\"], \\\" \\\", RowBox[{\\\"(\\\", \
RowBox[{FractionBox[\\\"2.0999418124692751562935024571548008249`19.\
69897000433602\\\", \\\"r\\\"], \\\"-\\\", \\\"r\\\"}], \\\")\\\"}], \\\" \
\\\", RowBox[{\\\"MittagLefflerE\\\", \\\"[\\\", RowBox[{\\\"1.5`\\\", \
\\\",\\\", RowBox[{FractionBox[\\\"5\\\", \\\"2\\\"], \\\" \\\", \
SuperscriptBox[RowBox[{\\\"(\\\", \
RowBox[{FractionBox[\\\"2.0999418124692751562935024571548008249`19.\
69897000433602\\\", \\\"r\\\"], \\\"-\\\", \\\"r\\\"}], \\\")\\\"}], \
\\\"2\\\"]}]}], \\\"]\\\"}]}]\\)) is less than WorkingPrecision \
(\\!\\(\\*RowBox[{\\\"20.`\\\"}]\\)).\"", 2, 315, 136, 32764161059608508428, 
   "Local"},
  "MessageTemplate"]], "Message", "MSG",
 CellChangeTimes->{3.887098057703395*^9},
 CellLabel->
  "During evaluation of \
In[315]:=",ExpressionUUID->"16ad7cef-3fc0-4e82-8d5e-43624fbde44d"],

Cell[BoxData[
 TemplateBox[{
  "General", "stop", 
   "\"Further output of \\!\\(\\*StyleBox[RowBox[{\\\"NIntegrate\\\", \
\\\"::\\\", \\\"precw\\\"}], \\\"MessageName\\\"]\\) will be suppressed \
during this calculation.\"", 2, 315, 137, 32764161059608508428, "Local"},
  "MessageTemplate"]], "Message", "MSG",
 CellChangeTimes->{3.8870980577123995`*^9},
 CellLabel->
  "During evaluation of \
In[315]:=",ExpressionUUID->"a7fb6553-0aba-44ec-b72c-649f1d9541c0"]
}, Open  ]],

Cell[BoxData[
 RowBox[{
  RowBox[{
  "Obter", " ", "velocidades", " ", "para", " ", "fazer", " ", 
   "gr\[AAcute]ficos", " ", "no", " ", "Excell"}], 
  "\[IndentingNewLine]"}]], "Input",
 CellChangeTimes->{{3.863173063992695*^9, 3.8631730773729844`*^9}},
 Background->RGBColor[
  0.87, 0.94, 1],ExpressionUUID->"b76299e0-c396-40e2-b2f4-d9fca32c7cd6"],

Cell[BoxData[
 RowBox[{"(*", 
  RowBox[{"(*", 
   RowBox[{
    RowBox[{"shear", " ", "rate"}], " ", "-", " ", "slope"}], "*)"}], "\n", 
  RowBox[{
   RowBox[{"Clear", "[", "\"\<Global`*\>\"", "]"}], ";", 
   "\[IndentingNewLine]", 
   RowBox[{"b", "=", "0.7104"}], ";", "\[IndentingNewLine]", 
   RowBox[{"\[Alpha]", "=", "0.5"}], ";", 
   RowBox[{"\[Beta]", "=", "1"}], ";", 
   RowBox[{"\[Lambda]", "=", "1"}], ";", 
   RowBox[{"\[Eta]", "=", "1"}], ";", 
   RowBox[{"\[CurlyEpsilon]", "=", 
    RowBox[{"5", "/", "100"}]}], ";", 
   RowBox[{"Wi", "=", "10"}], ";", 
   RowBox[{"a", "=", 
    RowBox[{"1", "/", "2"}]}], ";", 
   RowBox[{"RR", "=", 
    RowBox[{"1", "/", 
     RowBox[{"(", 
      RowBox[{"1", "-", "a"}], ")"}]}]}], ";", 
   RowBox[{"Pz", "=", 
    RowBox[{"-", "1"}]}], ";", 
   RowBox[{"(*", 
    RowBox[{
     RowBox[{"Print", "[", 
      RowBox[{
      "\"\<\[CurlyEpsilon]*\!\(\*SuperscriptBox[\(Wi\), \(2\)]\)=   \>\"", 
       ",", 
       RowBox[{"\[CurlyEpsilon]", "*", 
        SuperscriptBox["Wi", "2"]}]}], "]"}], ";"}], "*)"}], 
   "\[IndentingNewLine]", "\[IndentingNewLine]", 
   RowBox[{
    RowBox[{"shradi", "[", "r_", "]"}], ":=", 
    RowBox[{
     RowBox[{"(", 
      RowBox[{
       RowBox[{"(", 
        RowBox[{"Gamma", "[", "\[Beta]", "]"}], ")"}], "/", "2"}], ")"}], "*", 
     RowBox[{"(", 
      RowBox[{
       RowBox[{
        RowBox[{"(", 
         RowBox[{
          SuperscriptBox["b", "2"], "*", 
          SuperscriptBox["RR", "2"]}], ")"}], "/", "r"}], "-", "r"}], ")"}], 
     "*", 
     RowBox[{"MittagLefflerE", "[", 
      RowBox[{"\[Alpha]", ",", "\[Beta]", ",", 
       RowBox[{
        RowBox[{"(", 
         RowBox[{
          RowBox[{"(", 
           RowBox[{"\[CurlyEpsilon]", "*", 
            SuperscriptBox["Wi", "2"]}], ")"}], "/", "2"}], ")"}], "*", 
        SuperscriptBox[
         RowBox[{"(", 
          RowBox[{
           RowBox[{
            RowBox[{"(", 
             RowBox[{
              SuperscriptBox["b", "2"], "*", 
              SuperscriptBox["RR", "2"]}], ")"}], "/", "r"}], "-", "r"}], 
          ")"}], "2"]}]}], "]"}]}]}], 
   RowBox[{"(*", 
    RowBox[{"dimensionless", " ", "shear", " ", "rate"}], "*)"}], ";", 
   "\[IndentingNewLine]", 
   RowBox[{"Do", "[", 
    RowBox[{
     RowBox[{"Print", "[", 
      RowBox[{"shradi", "[", "i", "]"}], "]"}], ",", 
     RowBox[{"{", 
      RowBox[{"i", ",", "1", ",", "2", ",", "0.01"}], "}"}]}], "]"}]}], 
  "*)"}]], "Input",
 CellChangeTimes->{{3.863601187251302*^9, 3.863601233828702*^9}, {
   3.863601264311514*^9, 3.8636013113806543`*^9}, {3.8636013838172245`*^9, 
   3.863601388151455*^9}, {3.86360142304027*^9, 3.863601468322981*^9}, {
   3.8866583028006*^9, 3.8866583117802963`*^9}, 
   3.886841502355787*^9},ExpressionUUID->"4eb4b7b0-6baf-474d-8b74-\
97f3b8be2d8f"],

Cell[BoxData[""], "Input",
 CellChangeTimes->{{3.8636012451211233`*^9, 3.863601246648084*^9}, {
  3.864473153603718*^9, 3.864473154928325*^9}},
 Background->RGBColor[
  0.87, 0.94, 1],ExpressionUUID->"6b9a5ad2-0c5a-4846-8789-b85d95890d2c"],

Cell[BoxData[
 RowBox[{"(*", 
  RowBox[{"Do", "[", 
   RowBox[{
    RowBox[{"Print", "[", 
     RowBox[{"u", "[", "i", "]"}], "]"}], ",", 
    RowBox[{"{", 
     RowBox[{"i", ",", "1", ",", "2", ",", "0.01"}], "}"}]}], "]"}], 
  "*)"}]], "Input",
 CellChangeTimes->{
  3.8868415147164*^9},ExpressionUUID->"7aacf4e9-1420-4f75-9511-8283ff762f56"],

Cell[BoxData[
 RowBox[{"\[IndentingNewLine]", 
  RowBox[{"(*", 
   RowBox[{
   "Testar", " ", "a", " ", "solu\[CCedilla]\[ATilde]o", " ", "usando", " ", 
    "uma", " ", 
    RowBox[{"s\[EAcute]rie", ":", "\[IndentingNewLine]", 
     RowBox[{
      RowBox[{"(", "1", ")"}], " ", "taxa", " ", "de", " ", "corte", 
      "\[IndentingNewLine]", "\t", 
      RowBox[{"(", "2", ")"}], " ", "perfil", " ", "de", " ", "velocidades", 
      " ", "com", " ", "integra\[CCedilla]\[ATilde]o", "\[IndentingNewLine]", 
      "\t\t", 
      RowBox[{"(", "2", ")"}], " ", "perfil", " ", "de", " ", "velocidades", 
      " ", "sem", " ", "integra\[CCedilla]\[ATilde]o"}]}]}], "*)"}], 
  "\[IndentingNewLine]"}]], "Input",
 CellChangeTimes->{{3.81158959244633*^9, 3.811589601472954*^9}, {
   3.811600870527273*^9, 3.811600874076318*^9}, {3.863168270691057*^9, 
   3.8631683038516984`*^9}, {3.863169152398496*^9, 3.863169169499906*^9}, 
   3.886841518208448*^9},
 Background->RGBColor[
  0.87, 0.94, 1],ExpressionUUID->"c1cf43cf-6994-4b75-ad07-2780886971d9"],

Cell[BoxData[
 RowBox[{"(*", 
  RowBox[{"Shear", " ", "Rate"}], "*)"}]], "Input",
 CellChangeTimes->{{3.8631683522353907`*^9, 3.863168361062586*^9}},
 Background->RGBColor[
  0.88, 1, 0.88],ExpressionUUID->"cfd705f1-289b-4490-a707-3a28ee277b8e"],

Cell[CellGroupData[{

Cell[BoxData[
 RowBox[{"(*", 
  RowBox[{
   RowBox[{"PointR", "=", "1.7"}], ";", " ", 
   RowBox[{"(*", 
    RowBox[{"select", " ", "a", " ", "point", " ", "in", " ", "the", " ", 
     RowBox[{"range", " ", "[", 
      RowBox[{"aRR", ",", "RR"}], "]"}]}], "*)"}], "\[IndentingNewLine]", 
   RowBox[{"Print", "[", 
    RowBox[{"\"\<numerical solution:  \>\"", ",", 
     RowBox[{"shradi", "[", "PointR", "]"}]}], "]"}], ";", 
   "\[IndentingNewLine]", 
   RowBox[{
    RowBox[{"shradisum", "[", "r_", "]"}], ":=", 
    RowBox[{
     RowBox[{"(", 
      RowBox[{
       RowBox[{"(", 
        RowBox[{"Gamma", "[", "\[Beta]", "]"}], ")"}], "/", "2"}], ")"}], "*", 
     RowBox[{"(", 
      RowBox[{
       RowBox[{
        RowBox[{"(", 
         RowBox[{
          SuperscriptBox["b", "2"], "*", 
          SuperscriptBox["RR", "2"]}], ")"}], "/", "r"}], "-", "r"}], ")"}], 
     "*", 
     RowBox[{"Sum", "[", 
      RowBox[{
       RowBox[{
        SuperscriptBox[
         RowBox[{"(", 
          RowBox[{
           RowBox[{"(", 
            RowBox[{
             RowBox[{"(", 
              RowBox[{"\[CurlyEpsilon]", "*", 
               SuperscriptBox["Wi", "2"]}], ")"}], "/", "2"}], ")"}], "*", 
           SuperscriptBox[
            RowBox[{"(", 
             RowBox[{
              RowBox[{
               RowBox[{"(", 
                RowBox[{
                 SuperscriptBox["b", "2"], "*", 
                 SuperscriptBox["RR", "2"]}], ")"}], "/", "r"}], "-", "r"}], 
             ")"}], "2"]}], ")"}], "k"], "/", 
        RowBox[{"Gamma", "[", 
         RowBox[{
          RowBox[{"\[Alpha]", "*", "k"}], "+", "\[Beta]"}], "]"}]}], ",", 
       RowBox[{"{", 
        RowBox[{"k", ",", "0", ",", "3"}], "}"}]}], "]"}]}]}], ";", 
   "\[IndentingNewLine]", 
   RowBox[{"Print", "[", 
    RowBox[{"\"\<analytical solution:  \>\"", ",", 
     RowBox[{"shradisum", "[", "PointR", "]"}]}], "]"}], ";"}], 
  "*)"}]], "Input",
 CellChangeTimes->{{3.8631709546958933`*^9, 3.863170977835064*^9}, {
   3.863248307437291*^9, 3.863248308001836*^9}, {3.8866590199518747`*^9, 
   3.886659026950302*^9}, {3.886659260240015*^9, 3.8866592803825045`*^9}, 
   3.8868415241806593`*^9},ExpressionUUID->"64bb1687-2c61-4e11-ad3e-\
45cd431cdb66"],

Cell[CellGroupData[{

Cell[BoxData[
 InterpretationBox[
  RowBox[{"\<\"numerical solution:  \"\>", "\[InvisibleSpace]", 
   RowBox[{"-", "1.0223572235351038`*^8"}]}],
  SequenceForm["numerical solution:  ", -1.0223572235351038`*^8],
  Editable->False]], "Print",
 CellChangeTimes->{
  3.8631709800573606`*^9, 3.8631717193863087`*^9, 3.863172900691705*^9, 
   3.86324831349168*^9, 3.88665904038951*^9, {3.886659265034375*^9, 
   3.8866592840200663`*^9}},
 CellLabel->
  "During evaluation of \
In[97]:=",ExpressionUUID->"89d6da79-3f25-449e-b43e-b899adaeeb6b"],

Cell[BoxData[
 InterpretationBox[
  RowBox[{"\<\"analytical solution:  \"\>", "\[InvisibleSpace]", 
   "1.3873257368839151`"}],
  SequenceForm["analytical solution:  ", 1.3873257368839151`],
  Editable->False]], "Print",
 CellChangeTimes->{
  3.8631709800573606`*^9, 3.8631717193863087`*^9, 3.863172900691705*^9, 
   3.86324831349168*^9, 3.88665904038951*^9, {3.886659265034375*^9, 
   3.8866592840230656`*^9}},
 CellLabel->
  "During evaluation of \
In[97]:=",ExpressionUUID->"102d256e-e7be-46c8-bdee-2f95bec85be4"]
}, Open  ]]
}, Open  ]],

Cell[BoxData[
 RowBox[{"(*", 
  RowBox[{
  "Velocity", " ", "Profile", " ", "with", " ", "an", " ", "integral", " ", 
   RowBox[{"(", 
    RowBox[{
     RowBox[{"for", " ", "the", " ", "tested", " ", "cases"}], ",", " ", 
     RowBox[{
      RowBox[{
      "a", " ", "k", " ", "ranging", " ", "from", " ", "0", " ", "to", " ", 
       "4", " ", "allowed", " ", "accurate", " ", "results", " ", "for", " ", 
       "Wi"}], "=", "1"}]}], ")"}]}], "*)"}]], "Input",
 CellChangeTimes->{{3.863168373314953*^9, 3.8631683766255417`*^9}, {
  3.8631691055414457`*^9, 3.8631691329323263`*^9}, {3.863173110748307*^9, 
  3.8631731136237974`*^9}, {3.863249151408454*^9, 3.8632491548438716`*^9}},
 Background->RGBColor[
  0.88, 1, 0.88],ExpressionUUID->"3250ffc1-3446-45a6-a2bb-c9fd511bed0a"],

Cell[CellGroupData[{

Cell[BoxData[
 RowBox[{"(*", 
  RowBox[{
   RowBox[{"PointR", "=", "1.67"}], ";", " ", 
   RowBox[{"(*", 
    RowBox[{"select", " ", "a", " ", "point", " ", "in", " ", "the", " ", 
     RowBox[{"range", " ", "[", 
      RowBox[{"aRR", ",", "RR"}], "]"}]}], "*)"}], "\[IndentingNewLine]", 
   RowBox[{"Print", "[", 
    RowBox[{"\"\<numerical solution:  \>\"", ",", 
     RowBox[{"u", "[", "PointR", "]"}]}], "]"}], ";", "\[IndentingNewLine]", 
   RowBox[{
    RowBox[{"uvel", "[", "r_", "]"}], ":=", 
    RowBox[{
     RowBox[{"(", 
      FractionBox[
       RowBox[{"Gamma", "[", "\[Beta]", "]"}], "2"], ")"}], "*", 
     RowBox[{"Sum", "[", 
      RowBox[{
       RowBox[{
        FractionBox[
         SuperscriptBox[
          RowBox[{"(", 
           FractionBox[
            RowBox[{"\[CurlyEpsilon]", "*", 
             SuperscriptBox["Wi", "2"]}], "2"], ")"}], "k"], 
         RowBox[{"Gamma", "[", 
          RowBox[{
           RowBox[{"\[Alpha]", "*", "k"}], "+", "\[Beta]"}], "]"}]], "*", 
        RowBox[{"(", 
         RowBox[{
          SubsuperscriptBox["\[Integral]", 
           RowBox[{"a", "*", "RR"}], "r"], 
          RowBox[{
           SuperscriptBox[
            RowBox[{"(", 
             RowBox[{
              FractionBox[
               RowBox[{
                SuperscriptBox["b", "2"], "*", 
                SuperscriptBox["RR", "2"]}], "x"], "-", "x"}], ")"}], 
            RowBox[{
             RowBox[{"2", "*", "k"}], "+", "1"}]], 
           RowBox[{"\[DifferentialD]", "x"}]}]}], ")"}]}], ",", 
       RowBox[{"{", 
        RowBox[{"k", ",", "0", ",", "4"}], "}"}]}], "]"}]}]}], ";", 
   "\[IndentingNewLine]", 
   RowBox[{"Print", "[", 
    RowBox[{"\"\<analytical solution:  \>\"", ",", 
     RowBox[{"uvel", "[", "PointR", "]"}]}], "]"}], ";"}], "*)"}]], "Input",
 CellChangeTimes->{{3.8631685363282795`*^9, 3.8631685577112837`*^9}, {
   3.8631686113990726`*^9, 3.8631686567297573`*^9}, {3.8631686984822884`*^9, 
   3.863168797387203*^9}, {3.8631689073229847`*^9, 3.863168913257534*^9}, {
   3.863168964381963*^9, 3.8631690061410704`*^9}, {3.8631690526225586`*^9, 
   3.863169065450426*^9}, {3.863170758895604*^9, 3.863170924322678*^9}, {
   3.8631718899447317`*^9, 3.8631718904998016`*^9}, {3.8632483286997805`*^9, 
   3.8632483634347253`*^9}, {3.886659175951655*^9, 3.886659182260191*^9}, 
   3.886841528781658*^9},ExpressionUUID->"ceae716f-61da-42dd-b233-\
60165d7da522"],

Cell[CellGroupData[{

Cell[BoxData[
 InterpretationBox[
  RowBox[{"\<\"numerical solution:  \"\>", "\[InvisibleSpace]", 
   RowBox[{"u", "[", "1.67`", "]"}]}],
  SequenceForm["numerical solution:  ", 
   $CellContext`u[1.67]],
  Editable->False]], "Print",
 CellChangeTimes->{{3.8631708332574086`*^9, 3.8631708473173947`*^9}, {
   3.863170878773893*^9, 3.8631709247931337`*^9}, 3.8631709906258955`*^9, 
   3.8631717232612605`*^9, 3.863171891540179*^9, 3.8631729067347307`*^9, 
   3.863230922913203*^9, {3.8632483311522536`*^9, 3.863248363945464*^9}, 
   3.8866592086356916`*^9},
 CellLabel->
  "During evaluation of \
In[85]:=",ExpressionUUID->"0dc699b7-95fb-4909-9b5d-cf27c8eb98d1"],

Cell[BoxData[
 InterpretationBox[
  RowBox[{"\<\"analytical solution:  \"\>", "\[InvisibleSpace]", 
   "13808.901988872021`"}],
  SequenceForm["analytical solution:  ", 13808.901988872021`],
  Editable->False]], "Print",
 CellChangeTimes->{{3.8631708332574086`*^9, 3.8631708473173947`*^9}, {
   3.863170878773893*^9, 3.8631709247931337`*^9}, 3.8631709906258955`*^9, 
   3.8631717232612605`*^9, 3.863171891540179*^9, 3.8631729067347307`*^9, 
   3.863230922913203*^9, {3.8632483311522536`*^9, 3.863248363945464*^9}, 
   3.8866592099561043`*^9},
 CellLabel->
  "During evaluation of \
In[85]:=",ExpressionUUID->"67d18a74-3cd0-47a1-b9df-26f84bdc4e3b"]
}, Open  ]]
}, Open  ]],

Cell[BoxData[
 RowBox[{"(*", 
  RowBox[{
  "Velocity", " ", "Profile", " ", "without", " ", "the", " ", "integral", 
   RowBox[{"(", 
    RowBox[{
     RowBox[{"for", " ", "the", " ", "tested", " ", "cases"}], ",", " ", 
     RowBox[{
      RowBox[{
      "a", " ", "k", " ", "ranging", " ", "from", " ", "0", " ", "to", " ", 
       "4", " ", "allowed", " ", "accurate", " ", "results", " ", "for", " ", 
       "Wi"}], "=", "1"}], ",", " ", "for"}], ")"}]}], "*)"}]], "Input",
 CellChangeTimes->{{3.863168373314953*^9, 3.8631683766255417`*^9}, {
  3.8631691055414457`*^9, 3.8631691329323263`*^9}, {3.8631731164624424`*^9, 
  3.8631731206861563`*^9}, {3.863249161800169*^9, 3.863249191872387*^9}},
 Background->RGBColor[
  0.88, 1, 0.88],ExpressionUUID->"41df354e-15d1-48de-a8d9-0b8486b4b6fc"],

Cell[CellGroupData[{

Cell[BoxData[
 RowBox[{"(*", 
  RowBox[{
   RowBox[{"PointR", "=", "1.9"}], ";", " ", 
   RowBox[{"(*", 
    RowBox[{"select", " ", "a", " ", "point", " ", "in", " ", "the", " ", 
     RowBox[{"range", " ", "[", 
      RowBox[{"aRR", ",", "RR"}], "]"}]}], "*)"}], "\[IndentingNewLine]", 
   RowBox[{"Print", "[", 
    RowBox[{"\"\<numerical solution:  \>\"", ",", 
     RowBox[{"u", "[", "PointR", "]"}]}], "]"}], ";", "\[IndentingNewLine]", 
   RowBox[{
    RowBox[{"f", "[", 
     RowBox[{"m_", ",", "k_", ",", "r_"}], "]"}], ":=", 
    RowBox[{"If", "[", 
     RowBox[{
      RowBox[{
       RowBox[{"m", "<=", "k"}], " ", "&&", " ", 
       RowBox[{"m", ">=", "k"}]}], ",", 
      RowBox[{
       RowBox[{"Log", "[", "r", "]"}], "-", 
       RowBox[{"Log", "[", 
        RowBox[{"a", "*", "RR"}], "]"}]}], ",", 
      FractionBox[
       RowBox[{
        SuperscriptBox["r", 
         RowBox[{"2", "*", 
          RowBox[{"(", 
           RowBox[{"m", "-", "k"}], ")"}]}]], "-", 
        SuperscriptBox[
         RowBox[{"(", 
          RowBox[{"a", "*", "RR"}], ")"}], 
         RowBox[{"2", "*", 
          RowBox[{"(", 
           RowBox[{"m", "-", "k"}], ")"}]}]]}], 
       RowBox[{"2", "*", 
        RowBox[{"(", 
         RowBox[{"m", "-", "k"}], ")"}]}]]}], "]"}]}], ";", 
   "\[IndentingNewLine]", 
   RowBox[{
    RowBox[{"uvel2", "[", "r_", "]"}], ":=", 
    RowBox[{
     RowBox[{"(", 
      FractionBox[
       RowBox[{
        RowBox[{"-", 
         RowBox[{"Gamma", "[", "\[Beta]", "]"}]}], "*", "Pz"}], "2"], ")"}], 
     "*", 
     RowBox[{"Sum", "[", 
      RowBox[{
       RowBox[{
        FractionBox[
         SuperscriptBox[
          RowBox[{"(", 
           FractionBox[
            RowBox[{"\[CurlyEpsilon]", "*", 
             SuperscriptBox["Wi", "2"], "*", 
             SuperscriptBox["Pz", "2"]}], "2"], ")"}], "k"], 
         RowBox[{"Gamma", "[", 
          RowBox[{
           RowBox[{"\[Alpha]", "*", "k"}], "+", "\[Beta]"}], "]"}]], "*", 
        RowBox[{"(", 
         RowBox[{"Sum", "[", 
          RowBox[{
           RowBox[{
            RowBox[{"Binomial", "[", 
             RowBox[{
              RowBox[{
               RowBox[{"2", "*", "k"}], "+", "1"}], ",", "m"}], "]"}], "*", 
            SuperscriptBox[
             RowBox[{"(", 
              RowBox[{"-", "1"}], ")"}], "m"], "*", 
            SuperscriptBox[
             RowBox[{"(", 
              FractionBox[
               RowBox[{
                SuperscriptBox["b", "2"], "*", 
                SuperscriptBox["RR", "2"]}], "1"], ")"}], 
             RowBox[{
              RowBox[{"2", "*", "k"}], "+", "1", "-", "m"}]], "*", 
            RowBox[{"f", "[", 
             RowBox[{"m", ",", "k", ",", "r"}], "]"}]}], ",", 
           RowBox[{"{", 
            RowBox[{"m", ",", "0", ",", 
             RowBox[{
              RowBox[{"2", "*", "k"}], "+", "1"}]}], "}"}]}], "]"}], ")"}]}], 
       ",", 
       RowBox[{"{", 
        RowBox[{"k", ",", "0", ",", "10"}], "}"}]}], "]"}]}]}], ";", 
   "\[IndentingNewLine]", 
   RowBox[{"Print", "[", 
    RowBox[{"\"\<analytical solution:  \>\"", ",", 
     RowBox[{"uvel2", "[", "PointR", "]"}]}], "]"}], ";"}], "*)"}]], "Input",
 CellChangeTimes->{{3.86317189897189*^9, 3.8631719563926835`*^9}, {
   3.863172912239935*^9, 3.8631729125563135`*^9}, {3.8632484061406856`*^9, 
   3.8632484127226644`*^9}, 
   3.8868415328371363`*^9},ExpressionUUID->"28abf26c-d8f0-42ea-9fae-\
724795685a4c"],

Cell[CellGroupData[{

Cell[BoxData[
 InterpretationBox[
  RowBox[{"\<\"numerical solution:  \"\>", "\[InvisibleSpace]", 
   "0.1828262139158823`"}],
  SequenceForm["numerical solution:  ", 0.1828262139158823],
  Editable->False]], "Print",
 CellChangeTimes->{{3.863171917282137*^9, 3.863171957179454*^9}, 
   3.863172913272155*^9, 3.8632309355742874`*^9, 3.863231050261381*^9, {
   3.8632483907235003`*^9, 3.863248413514286*^9}},
 CellLabel->
  "During evaluation of \
In[181]:=",ExpressionUUID->"666f277d-6568-4386-aec7-d4e57f04f25d"],

Cell[BoxData[
 InterpretationBox[
  RowBox[{"\<\"analytical solution:  \"\>", "\[InvisibleSpace]", 
   "0.18282620675304284`"}],
  SequenceForm["analytical solution:  ", 0.18282620675304284`],
  Editable->False]], "Print",
 CellChangeTimes->{{3.863171917282137*^9, 3.863171957179454*^9}, 
   3.863172913272155*^9, 3.8632309355742874`*^9, 3.863231050261381*^9, {
   3.8632483907235003`*^9, 3.8632484135212812`*^9}},
 CellLabel->
  "During evaluation of \
In[181]:=",ExpressionUUID->"ab158285-81da-4157-bac4-187ef5f7cce5"]
}, Open  ]]
}, Open  ]],

Cell[BoxData[
 RowBox[{"\[IndentingNewLine]", 
  RowBox[{
   RowBox[{"Obter", " ", "o", " ", "\"\<b\>\""}], 
   "\[IndentingNewLine]"}]}]], "Input",
 CellChangeTimes->{{3.863251103107233*^9, 3.8632511334962263`*^9}, {
  3.863251464845893*^9, 3.8632514688126516`*^9}, {3.8868276564076805`*^9, 
  3.886827658321495*^9}},
 Background->RGBColor[
  0.87, 0.94, 1],ExpressionUUID->"cc5c92d8-a585-4d1c-baf2-2b931a032113"],

Cell[CellGroupData[{

Cell[BoxData[
 RowBox[{"\[IndentingNewLine]", 
  RowBox[{
   RowBox[{
    RowBox[{"Clear", "[", "\"\<Global`*\>\"", "]"}], ";"}], 
   "\[IndentingNewLine]", "\[IndentingNewLine]", 
   RowBox[{
    RowBox[{"\[Alpha]", "=", "0.75"}], ";", 
    RowBox[{"\[Beta]", "=", "1"}], ";", 
    RowBox[{"\[Lambda]", "=", "1"}], ";", 
    RowBox[{"\[Eta]", "=", "1"}], ";", 
    RowBox[{"\[CurlyEpsilon]", "=", 
     FractionBox["5", "100"]}], ";", 
    RowBox[{"WiU", "=", 
     RowBox[{"Sqrt", "[", "5", "]"}]}], ";", 
    RowBox[{"a", "=", 
     FractionBox["1", "2"]}], ";", 
    RowBox[{"RR", "=", 
     FractionBox["1", 
      RowBox[{"1", "-", "a"}]]}], ";", 
    RowBox[{"Print", "[", 
     RowBox[{
     "\"\<\[CurlyEpsilon]*\!\(\*SuperscriptBox[\(Wi\), \(2\)]\)=   \>\"", ",", 
      RowBox[{"\[CurlyEpsilon]", "*", 
       SuperscriptBox["Wi", "2"]}]}], "]"}]}], "\[IndentingNewLine]", 
   RowBox[{
    RowBox[{
     RowBox[{"shradi", "[", "r_", "]"}], ":=", 
     RowBox[{
      RowBox[{"(", 
       FractionBox[
        RowBox[{"Gamma", "[", "\[Beta]", "]"}], "2"], ")"}], "*", 
      RowBox[{"(", 
       RowBox[{
        FractionBox[
         RowBox[{
          SuperscriptBox["b", "2"], "*", 
          SuperscriptBox["RR", "2"]}], "r"], "-", "r"}], ")"}], "*", 
      RowBox[{"MittagLefflerE", "[", 
       RowBox[{"\[Alpha]", ",", "\[Beta]", ",", 
        RowBox[{
         RowBox[{"(", 
          FractionBox[
           RowBox[{"\[CurlyEpsilon]", "*", 
            SuperscriptBox["Wi", "2"]}], "2"], ")"}], "*", 
         SuperscriptBox[
          RowBox[{"(", 
           RowBox[{
            FractionBox[
             RowBox[{
              SuperscriptBox["b", "2"], "*", 
              SuperscriptBox["RR", "2"]}], "r"], "-", "r"}], ")"}], "2"]}]}], 
       "]"}]}]}], ";"}], "\[IndentingNewLine]", 
   RowBox[{
    RowBox[{
     RowBox[{"f", "[", 
      RowBox[{"m_", ",", "k_", ",", "r_"}], "]"}], ":=", 
     RowBox[{"If", "[", 
      RowBox[{
       RowBox[{
        RowBox[{"m", "<=", "k"}], " ", "&&", " ", 
        RowBox[{"m", ">=", "k"}]}], ",", 
       RowBox[{
        RowBox[{"Log", "[", "r", "]"}], "-", 
        RowBox[{"Log", "[", 
         RowBox[{"a", "*", "RR"}], "]"}]}], ",", 
       FractionBox[
        RowBox[{
         SuperscriptBox["r", 
          RowBox[{"2", "*", 
           RowBox[{"(", 
            RowBox[{"m", "-", "k"}], ")"}]}]], "-", 
         SuperscriptBox[
          RowBox[{"(", 
           RowBox[{"a", "*", "RR"}], ")"}], 
          RowBox[{"2", "*", 
           RowBox[{"(", 
            RowBox[{"m", "-", "k"}], ")"}]}]]}], 
        RowBox[{"2", "*", 
         RowBox[{"(", 
          RowBox[{"m", "-", "k"}], ")"}]}]]}], "]"}]}], ";"}], 
   "\[IndentingNewLine]", 
   RowBox[{
    RowBox[{
     RowBox[{"uvel2", "[", "r_", "]"}], ":=", 
     RowBox[{
      RowBox[{"(", 
       FractionBox[
        RowBox[{"Gamma", "[", "\[Beta]", "]"}], "2"], ")"}], "*", 
      RowBox[{"Sum", "[", 
       RowBox[{
        RowBox[{
         FractionBox[
          SuperscriptBox[
           RowBox[{"(", 
            FractionBox[
             RowBox[{"\[CurlyEpsilon]", "*", 
              SuperscriptBox["Wi", "2"]}], "2"], ")"}], "k"], 
          RowBox[{"Gamma", "[", 
           RowBox[{
            RowBox[{"\[Alpha]", "*", "k"}], "+", "\[Beta]"}], "]"}]], "*", 
         RowBox[{"(", 
          RowBox[{"Sum", "[", 
           RowBox[{
            RowBox[{
             RowBox[{"Binomial", "[", 
              RowBox[{
               RowBox[{
                RowBox[{"2", "*", "k"}], "+", "1"}], ",", "m"}], "]"}], "*", 
             SuperscriptBox[
              RowBox[{"(", 
               RowBox[{"-", "1"}], ")"}], "m"], "*", 
             SuperscriptBox[
              RowBox[{"(", 
               FractionBox[
                RowBox[{
                 SuperscriptBox["b", "2"], "*", 
                 SuperscriptBox["RR", "2"]}], "1"], ")"}], 
              RowBox[{
               RowBox[{"2", "*", "k"}], "+", "1", "-", "m"}]], "*", 
             RowBox[{"f", "[", 
              RowBox[{"m", ",", "k", ",", "r"}], "]"}]}], ",", 
            RowBox[{"{", 
             RowBox[{"m", ",", "0", ",", 
              RowBox[{
               RowBox[{"2", "*", "k"}], "+", "1"}]}], "}"}]}], "]"}], ")"}]}],
         ",", 
        RowBox[{"{", 
         RowBox[{"k", ",", "0", ",", "100"}], "}"}]}], "]"}]}]}], ";"}], 
   "\[IndentingNewLine]", 
   RowBox[{"(*", 
    RowBox[{"bval2", "=", 
     RowBox[{"FindRoot", "[", 
      RowBox[{
       RowBox[{"{", 
        RowBox[{
         RowBox[{
          RowBox[{"Integrate", "[", 
           RowBox[{
            RowBox[{"shradi", "[", "r", "]"}], ",", 
            RowBox[{"{", 
             RowBox[{"r", ",", 
              RowBox[{"a", "*", "RR"}], ",", "RR"}], "}"}]}], "]"}], "==", 
          "0"}], ",", 
         RowBox[{
          RowBox[{
           RowBox[{
            RowBox[{"(", 
             FractionBox["2", 
              RowBox[{
               SuperscriptBox["RR", "2"], "*", 
               RowBox[{"(", 
                RowBox[{"1", "-", 
                 SuperscriptBox["a", "2"]}], ")"}]}]], ")"}], "*", 
            RowBox[{"Integrate", "[", 
             RowBox[{
              RowBox[{"r", "*", 
               RowBox[{"uvel2", "[", "r", "]"}]}], ",", 
              RowBox[{"{", 
               RowBox[{"r", ",", 
                RowBox[{"a", "*", "RR"}], ",", "RR"}], "}"}]}], "]"}]}], "-", 
           "1"}], "==", "0"}]}], "}"}], ",", 
       RowBox[{"{", 
        RowBox[{
         RowBox[{"{", 
          RowBox[{"b", ",", "0.71", ",", "0.73"}], "}"}], ",", " ", ",", 
         RowBox[{"{", 
          RowBox[{"Pz", ",", 
           RowBox[{"-", "5"}], ",", 
           RowBox[{"-", "4"}]}], "}"}]}], "}"}], ",", 
       RowBox[{"MaxIterations", "\[Rule]", "10"}], ",", 
       RowBox[{"WorkingPrecision", "\[Rule]", "12"}]}], "]"}]}], 
    RowBox[{"(*", 
     RowBox[{"//", "Timing"}], "*)"}], "*)"}], "\[IndentingNewLine]", 
   RowBox[{"(*", 
    RowBox[{"bval2", "=", 
     RowBox[{"FindRoot", "[", 
      RowBox[{
       RowBox[{"{", 
        RowBox[{
         RowBox[{"uvel2", "[", "RR", "]"}], "==", "0"}], "}"}], ",", 
       RowBox[{"{", 
        RowBox[{"{", 
         RowBox[{"b", ",", "0.72", ",", "0.73"}], "}"}], "}"}], ",", 
       RowBox[{"MaxIterations", "\[Rule]", "100"}], ",", 
       RowBox[{"WorkingPrecision", "\[Rule]", "20"}]}], "]"}]}], "*)"}], 
   "\[IndentingNewLine]", 
   RowBox[{"bval2", "=", 
    RowBox[{"FindRoot", "[", 
     RowBox[{
      RowBox[{"{", 
       RowBox[{
        RowBox[{
         RowBox[{"uvel2", "[", "RR", "]"}], "==", "0"}], ",", 
        RowBox[{
         RowBox[{
          RowBox[{
           RowBox[{"(", 
            FractionBox["2", 
             RowBox[{
              SuperscriptBox["RR", "2"], "*", 
              RowBox[{"(", 
               RowBox[{"1", "-", 
                SuperscriptBox["a", "2"]}], ")"}]}]], ")"}], "*", 
           RowBox[{"Integrate", "[", 
            RowBox[{
             RowBox[{"r", "*", 
              RowBox[{"uvel2", "[", "r", "]"}]}], ",", 
             RowBox[{"{", 
              RowBox[{"r", ",", 
               RowBox[{"a", "*", "RR"}], ",", "RR"}], "}"}]}], "]"}]}], "-", 
          FractionBox["WiU", "Wi"]}], "==", "0"}]}], "}"}], ",", 
      RowBox[{"{", 
       RowBox[{
        RowBox[{"{", 
         RowBox[{"b", ",", "0.71", ",", "0.73"}], "}"}], ",", 
        RowBox[{"{", 
         RowBox[{"Wi", ",", "0.1", ",", "8.1"}], "}"}]}], "}"}], ",", 
      RowBox[{"MaxIterations", "\[Rule]", "100"}], ",", 
      RowBox[{"WorkingPrecision", "\[Rule]", "12"}]}], "]"}]}], 
   "\[IndentingNewLine]"}]}]], "Input",
 CellChangeTimes->{{3.8632306749810963`*^9, 3.8632306825530767`*^9}, {
   3.8632307178480372`*^9, 3.8632308333238726`*^9}, {3.8632308753158035`*^9, 
   3.8632309068927507`*^9}, {3.8632309487566867`*^9, 
   3.8632309701882157`*^9}, {3.863231021528795*^9, 3.8632310406724167`*^9}, {
   3.8632311016357174`*^9, 3.8632311347836723`*^9}, 3.86324779776077*^9, 
   3.8632509924484496`*^9, {3.8632510866232834`*^9, 3.8632510937392583`*^9}, {
   3.8632511376367893`*^9, 3.8632511379871583`*^9}, {3.863251202543092*^9, 
   3.863251202814088*^9}, 3.8632512420175056`*^9, {3.863251408088735*^9, 
   3.8632514085087595`*^9}, {3.8632519427139606`*^9, 
   3.8632519545298777`*^9}, {3.8632601191642694`*^9, 3.863260152149485*^9}, {
   3.86326067829817*^9, 3.863260679212443*^9}, {3.8632609872200537`*^9, 
   3.863260987637026*^9}, {3.8632610758659787`*^9, 3.863261077003915*^9}, {
   3.863261462781264*^9, 3.8632614688742743`*^9}, {3.86326228058386*^9, 
   3.863262289811897*^9}, {3.863262515324529*^9, 3.8632625155500183`*^9}, {
   3.863262744243765*^9, 3.86326274445975*^9}, {3.8632629508206377`*^9, 
   3.8632629527355747`*^9}, {3.8632632180442204`*^9, 
   3.8632632217863264`*^9}, {3.863263675724551*^9, 3.863263689046497*^9}, {
   3.8632638765931597`*^9, 3.86326387952183*^9}, {3.863264150288532*^9, 
   3.8632641504560356`*^9}, {3.8632642487457314`*^9, 3.86326426160364*^9}, {
   3.8632645892678423`*^9, 3.863264595390452*^9}, {3.863264738335245*^9, 
   3.8632647390840206`*^9}, {3.8632649613839035`*^9, 3.863264961654646*^9}, {
   3.863265400128649*^9, 3.863265418714536*^9}, {3.863270649931066*^9, 
   3.8632706653964853`*^9}, {3.863270900149659*^9, 3.8632709022306566`*^9}, {
   3.8632709712391925`*^9, 3.8632709724866285`*^9}, {3.8632711001375923`*^9, 
   3.863271100571309*^9}, {3.8632712757834477`*^9, 3.863271291826873*^9}, 
   3.8632714085998087`*^9, 3.863271610867894*^9, {3.8632717791992645`*^9, 
   3.8632717815650578`*^9}, {3.8632720750276093`*^9, 
   3.8632720953430862`*^9}, {3.8632723561436577`*^9, 3.863272356316448*^9}, {
   3.863272740392364*^9, 3.86327274996163*^9}, {3.86327302069188*^9, 
   3.863273021544387*^9}, {3.8632731614197097`*^9, 3.8632731634957194`*^9}, {
   3.8632732977440434`*^9, 3.8632733118860955`*^9}, {3.863273645917294*^9, 
   3.8632736466493015`*^9}, {3.8632738873940535`*^9, 
   3.8632738911056323`*^9}, {3.863521475473054*^9, 3.8635214905090265`*^9}, {
   3.863521740231617*^9, 3.863521748226592*^9}, {3.863524187793573*^9, 
   3.863524216394317*^9}, 3.8635242617384596`*^9, {3.863613152116598*^9, 
   3.8636131532762423`*^9}, {3.8636134158689156`*^9, 3.863613418539877*^9}, {
   3.8868252768436584`*^9, 3.886825288701719*^9}, {3.8868253242254057`*^9, 
   3.8868253372048063`*^9}, {3.8868254885557413`*^9, 3.886825517031884*^9}, {
   3.8868256418578005`*^9, 3.886825642093067*^9}, {3.886825912092293*^9, 
   3.8868259307381344`*^9}, {3.8868260751252923`*^9, 
   3.8868261298229637`*^9}, {3.8868416556247225`*^9, 3.886841665754425*^9}, {
   3.8868417803379517`*^9, 3.8868417815008984`*^9}, {3.8868419297599115`*^9, 
   3.8868419776738997`*^9}, {3.886842036118563*^9, 3.8868420401266394`*^9}, {
   3.886842077774332*^9, 3.886842133381621*^9}, {3.886842188839547*^9, 
   3.8868421907093105`*^9}, {3.8868423497355504`*^9, 3.886842359277817*^9}, {
   3.88684243007008*^9, 3.8868424481998215`*^9}, {3.8868425227023745`*^9, 
   3.8868425228740225`*^9}, {3.886843313856787*^9, 3.88684333523545*^9}, {
   3.8868435982148895`*^9, 3.8868435998335037`*^9}, {3.8868446445742273`*^9, 
   3.8868446610881443`*^9}, {3.8868449097012324`*^9, 
   3.8868449444429197`*^9}, {3.886845150179813*^9, 3.886845155095504*^9}, {
   3.8868452888477106`*^9, 3.8868452895253887`*^9}, {3.8868453878334837`*^9, 
   3.8868453883367777`*^9}, {3.886845619999329*^9, 3.8868456599286866`*^9}, {
   3.8868457796314006`*^9, 3.886845908504695*^9}, {3.8868460472194138`*^9, 
   3.886846114560915*^9}, {3.886846391901745*^9, 3.8868463939288826`*^9}, {
   3.886846458246683*^9, 3.886846458881072*^9}, {3.8868465143248477`*^9, 
   3.8868465145450397`*^9}, {3.8868465738549194`*^9, 3.886846575190775*^9}, {
   3.8868467699580593`*^9, 3.886846775509922*^9}, {3.886846920955905*^9, 
   3.8868469244977236`*^9}, {3.8868469678310485`*^9, 3.886846997919551*^9}, {
   3.886847902846277*^9, 3.886847907282211*^9}, 3.8868479410644927`*^9, {
   3.886847973310644*^9, 3.886847973688101*^9}, {3.8868481511587677`*^9, 
   3.8868481555041165`*^9}, {3.8868483384547625`*^9, 3.886848338873562*^9}, {
   3.886848389008731*^9, 3.8868484027092104`*^9}, {3.886848528802639*^9, 
   3.8868485299202075`*^9}, {3.886848611977792*^9, 3.886848612495669*^9}, {
   3.886848790898261*^9, 3.8868488163945584`*^9}, {3.8868489224249697`*^9, 
   3.886848925845588*^9}, 3.8868489705981674`*^9, {3.886849344290347*^9, 
   3.886849345877573*^9}, {3.8868494071117325`*^9, 3.8868494076145067`*^9}, {
   3.8868496427395315`*^9, 3.886849644085944*^9}, {3.8868498150859084`*^9, 
   3.88684981546343*^9}, {3.8868498488762493`*^9, 3.886849850419587*^9}, {
   3.8868500506788325`*^9, 3.886850058896927*^9}, {3.886850200305174*^9, 
   3.8868502010595565`*^9}, 3.8868503289081755`*^9, {3.8870846627529783`*^9, 
   3.887084666329136*^9}, {3.8870847117607527`*^9, 3.887084712181413*^9}, {
   3.8870848150662794`*^9, 3.8870848159207563`*^9}, {3.887084863082203*^9, 
   3.887084882184907*^9}, {3.887085306914853*^9, 3.887085307712351*^9}, {
   3.887088928458561*^9, 3.887088929919543*^9}, {3.8870914329713573`*^9, 
   3.8870914331095877`*^9}, {3.887092474343583*^9, 3.887092485652768*^9}, {
   3.88709274546731*^9, 3.8870927673833714`*^9}, {3.887092884566183*^9, 
   3.887092897948328*^9}, {3.8870972141095023`*^9, 3.887097228239803*^9}, {
   3.8870981442965975`*^9, 3.887098158414776*^9}, {3.8871003765036244`*^9, 
   3.8871003955410666`*^9}, {3.8871004271748323`*^9, 3.887100464863988*^9}, {
   3.887101092663786*^9, 3.887101098951357*^9}, {3.887193001868313*^9, 
   3.8871930222900825`*^9}, {3.8871931256776085`*^9, 
   3.8871931502829423`*^9}, {3.887193232794325*^9, 3.8871932478312206`*^9}, {
   3.8871933294160023`*^9, 3.887193338878374*^9}, {3.887193416640835*^9, 
   3.8871934386042457`*^9}, {3.8871935102172003`*^9, 
   3.8871935209767365`*^9}, {3.8871942338777585`*^9, 
   3.8871942468231072`*^9}, {3.8871943919889154`*^9, 3.887194403130228*^9}, {
   3.887194510598156*^9, 3.8871945319333334`*^9}, {3.887194695855523*^9, 
   3.8871946966091413`*^9}, {3.8871947387598257`*^9, 
   3.8871947390938244`*^9}, {3.8872553317235346`*^9, 
   3.8872553544326715`*^9}, {3.8872554477216873`*^9, 
   3.8872554488665686`*^9}, {3.887255528617646*^9, 3.88725552982049*^9}, {
   3.887255832040984*^9, 3.887255852192922*^9}, {3.887255935738638*^9, 
   3.887255937162635*^9}, {3.8872559982414665`*^9, 3.887255999614272*^9}, {
   3.8872560521955414`*^9, 3.887256053785711*^9}, {3.887256464023886*^9, 
   3.887256467938725*^9}, {3.8872565081563387`*^9, 3.88725650905952*^9}, {
   3.887256589732566*^9, 3.8872565908916674`*^9}, {3.887256662079315*^9, 
   3.8872566631415176`*^9}, {3.8872568957871404`*^9, 
   3.8872569039952803`*^9}, {3.88725699373421*^9, 3.8872569947929544`*^9}, {
   3.887257033892619*^9, 3.88725707374329*^9}, {3.8872572143110404`*^9, 
   3.8872572156710315`*^9}, {3.887257331730473*^9, 3.887257332854987*^9}, {
   3.8872577539898467`*^9, 3.88725777492741*^9}, {3.887257838098734*^9, 
   3.887257906863443*^9}, {3.887258214898482*^9, 3.8872583818632317`*^9}, {
   3.887258490093937*^9, 3.8872584956122613`*^9}, {3.88725870747451*^9, 
   3.8872587112761936`*^9}, {3.8872587562135983`*^9, 3.88725877128452*^9}, {
   3.8872588802810917`*^9, 3.887258918149778*^9}, {3.887258965849553*^9, 
   3.887258980120539*^9}, {3.887259020402026*^9, 3.8872590777393837`*^9}, {
   3.88725913857959*^9, 3.887259143040364*^9}, {3.8872592137625704`*^9, 
   3.8872593010167227`*^9}, {3.887259429285796*^9, 3.8872594412649875`*^9}, {
   3.88725978751003*^9, 3.887259788590664*^9}, {3.887260235537325*^9, 
   3.887260243360668*^9}, {3.8872604872638245`*^9, 3.887260526319826*^9}, {
   3.887260759711134*^9, 3.887260879823437*^9}, {3.8872610015027094`*^9, 
   3.8872610044667106`*^9}, {3.8872612668802586`*^9, 
   3.8872612828601885`*^9}, {3.887262120925335*^9, 3.8872621876874123`*^9}, {
   3.887262598635954*^9, 3.887262610202778*^9}, {3.887262800807113*^9, 
   3.8872628063421345`*^9}, {3.8872628585051136`*^9, 
   3.8872628593835335`*^9}, {3.8872630271527615`*^9, 3.887263028632204*^9}, {
   3.8872631498827977`*^9, 3.887263150999956*^9}, {3.8872635192208176`*^9, 
   3.8872635204966207`*^9}, {3.8872638076715174`*^9, 3.887263808387431*^9}, {
   3.8872638955938807`*^9, 3.887263897159861*^9}, {3.887263937472497*^9, 
   3.887263938359431*^9}, {3.887263985359997*^9, 3.8872640089909105`*^9}, {
   3.887264072689724*^9, 3.887264128593275*^9}, {3.8872644106169243`*^9, 
   3.8872644191151333`*^9}, {3.887272367625879*^9, 3.887272367766309*^9}, {
   3.8872724248545947`*^9, 3.88727242585972*^9}, {3.8872724565101814`*^9, 
   3.8872724660506687`*^9}, {3.8872725082357187`*^9, 
   3.8872725259356437`*^9}, {3.8872726893725643`*^9, 
   3.8872727256296887`*^9}, {3.887272768588253*^9, 3.887272769866582*^9}, {
   3.887272841971022*^9, 3.8872728429245243`*^9}, {3.887276444456712*^9, 
   3.887276472587823*^9}, {3.8872767958905907`*^9, 3.8872768671226377`*^9}, {
   3.8872770868988276`*^9, 3.8872770879890804`*^9}, {3.8872772432665834`*^9, 
   3.8872772613777065`*^9}, {3.8872773107134953`*^9, 3.887277321430043*^9}, {
   3.8872776812638*^9, 3.8872776816331177`*^9}, {3.8872777709921455`*^9, 
   3.8872777994386187`*^9}, {3.8872778516626806`*^9, 
   3.8872778648016396`*^9}, {3.8872779186721716`*^9, 
   3.8872779408608646`*^9}, {3.887277994971624*^9, 3.887277995418662*^9}, {
   3.8872780624985247`*^9, 3.887278066584807*^9}, {3.88727811445936*^9, 
   3.8872781153249283`*^9}, {3.8872785203425446`*^9, 3.887278528249765*^9}, {
   3.8872785765063257`*^9, 3.8872785777777877`*^9}, {3.8872786210873675`*^9, 
   3.8872786236046553`*^9}, {3.8872786629282856`*^9, 
   3.8872786708567305`*^9}, {3.887278739889863*^9, 3.887278746936844*^9}, {
   3.8872788419848213`*^9, 3.8872788432714853`*^9}, {3.887279015245554*^9, 
   3.8872790244565177`*^9}, {3.887279288192752*^9, 3.8872792972372837`*^9}, {
   3.8872794218417115`*^9, 3.8872794536803455`*^9}, {3.887279496721671*^9, 
   3.8872795132339087`*^9}, {3.8872800854713326`*^9, 
   3.8872800981761627`*^9}, {3.887280171816139*^9, 3.887280174835603*^9}, {
   3.8872806203918695`*^9, 3.887280653956049*^9}, {3.887280710924986*^9, 
   3.887280787859147*^9}, {3.8872808224444714`*^9, 3.887281310459345*^9}, {
   3.887361809630195*^9, 3.88736184450587*^9}, {3.8873670863934793`*^9, 
   3.887367149033052*^9}, {3.8873672167709246`*^9, 3.887367220194458*^9}, {
   3.8873674999300284`*^9, 3.8873675312420807`*^9}, {3.887367565386799*^9, 
   3.8873675802113743`*^9}, 3.887367622019653*^9, {3.88736769518362*^9, 
   3.887367697234705*^9}, {3.8873677428429456`*^9, 3.887367774482506*^9}, {
   3.8873678140401*^9, 3.8873678208880653`*^9}, {3.8873678845422597`*^9, 
   3.8873679281224174`*^9}, {3.887367990107594*^9, 3.887367994945608*^9}, {
   3.887368305387428*^9, 3.887368310243065*^9}, 3.887368395394524*^9, {
   3.887368740189739*^9, 3.8873687918178062`*^9}, {3.8873691209757843`*^9, 
   3.887369156970497*^9}, {3.887369349642494*^9, 3.887369362496994*^9}, {
   3.887369989040233*^9, 3.8873699891909485`*^9}, 3.8873700217064877`*^9, {
   3.8873717565453854`*^9, 3.8873717596748705`*^9}, {3.8873718649731483`*^9, 
   3.8873718657787943`*^9}, {3.887371970784896*^9, 3.887371972112666*^9}, {
   3.8873720755422907`*^9, 3.887372076568433*^9}, {3.8874348554492607`*^9, 
   3.8874348851236773`*^9}, {3.8874349176517625`*^9, 
   3.8874349253394837`*^9}, {3.8874351126604347`*^9, 
   3.8874352158901844`*^9}, {3.8874359951235933`*^9, 
   3.8874360264993525`*^9}, {3.8874360800312004`*^9, 
   3.8874361090124598`*^9}, {3.8874361788666897`*^9, 3.887436180418756*^9}, {
   3.887436312593707*^9, 3.8874363437086515`*^9}, {3.8874372618284273`*^9, 
   3.8874373047542367`*^9}, {3.887437424178491*^9, 3.8874374245349975`*^9}, {
   3.887437516521541*^9, 3.88743753003463*^9}, {3.887437613627*^9, 
   3.887437617433928*^9}, {3.8874444956953135`*^9, 3.88744450332301*^9}, {
   3.8874447095521145`*^9, 3.8874447301103387`*^9}, {3.8874451803007383`*^9, 
   3.8874451925981493`*^9}, {3.887450559612364*^9, 3.8874506107638187`*^9}, {
   3.887450654996521*^9, 3.887450685692523*^9}, {3.887450971081284*^9, 
   3.887450972443694*^9}, {3.8874510101406045`*^9, 3.8874510174035006`*^9}, {
   3.8874510490115013`*^9, 3.8874510795236025`*^9}, {3.8874511121966496`*^9, 
   3.8874511572377234`*^9}, {3.8874511880977583`*^9, 
   3.8874511895038013`*^9}, {3.887451238389289*^9, 3.8874512781081257`*^9}, {
   3.8874513854205017`*^9, 3.8874513964390373`*^9}, {3.8874514664345675`*^9, 
   3.887451469907234*^9}, {3.8874518225370636`*^9, 3.8874518253995914`*^9}, {
   3.8874539406683292`*^9, 3.8874539514230633`*^9}, {3.887453995936855*^9, 
   3.8874540107166495`*^9}, {3.887454071252102*^9, 3.8874541406630893`*^9}, {
   3.8874541989755907`*^9, 3.887454225166966*^9}, {3.887454269239642*^9, 
   3.8874542952069173`*^9}, {3.8874545845117683`*^9, 
   3.8874546121984105`*^9}, {3.887454678738736*^9, 3.887454683326745*^9}, {
   3.8874547297687054`*^9, 3.887454741262787*^9}, {3.8874548158628426`*^9, 
   3.887454816318636*^9}, {3.887454882712742*^9, 3.8874548833376055`*^9}, {
   3.8874549148018045`*^9, 3.8874551438450923`*^9}, {3.8877061094705296`*^9, 
   3.8877061164055524`*^9}, {3.887706207561268*^9, 3.8877062083186703`*^9}, {
   3.8877063174298124`*^9, 3.887706318321005*^9}, {3.887706485110574*^9, 
   3.887706498834283*^9}, {3.8877065672715764`*^9, 3.887706568088519*^9}, {
   3.8877066448768053`*^9, 3.887706646262249*^9}, {3.887884879572734*^9, 
   3.8878848990127263`*^9}, {3.887885119848899*^9, 3.8878851852308836`*^9}, {
   3.8878854700456505`*^9, 3.887885471534077*^9}, {3.887885505285147*^9, 
   3.887885515117657*^9}, 3.8879455135407743`*^9, {3.8879455966017337`*^9, 
   3.887945606290292*^9}, {3.8879459932742014`*^9, 3.887946032857072*^9}, {
   3.8879463484765253`*^9, 3.8879463551787653`*^9}, {3.8879492196961255`*^9, 
   3.8879492208026304`*^9}, {3.887949563548522*^9, 3.887949564494953*^9}, {
   3.8879496513223276`*^9, 3.8879496517974367`*^9}, {3.887949811978668*^9, 
   3.887949839626787*^9}, {3.887949870837265*^9, 3.8879498718403807`*^9}, {
   3.8879499543011756`*^9, 3.887949955452261*^9}, {3.8879500553705177`*^9, 
   3.88795005615475*^9}, {3.887950260557732*^9, 3.8879502631072836`*^9}, {
   3.8879635573230667`*^9, 3.887963574541438*^9}, {3.887963682348556*^9, 
   3.88796368259519*^9}, {3.8879638236250544`*^9, 3.887963825143727*^9}, 
   3.887963901044524*^9, {3.8879640324825735`*^9, 3.8879640370503845`*^9}, {
   3.8879642111677017`*^9, 3.8879642113117595`*^9}, {3.8879644106906347`*^9, 
   3.8879644331270866`*^9}, {3.887964688346223*^9, 3.887964692587592*^9}, {
   3.887964975500262*^9, 3.8879649778566837`*^9}, {3.8879651608302097`*^9, 
   3.8879651614560823`*^9}, {3.887965366828826*^9, 3.8879653684816036`*^9}, {
   3.8879656772386904`*^9, 3.8879656774836664`*^9}, {3.887965861049983*^9, 
   3.8879658640148597`*^9}, {3.887966051034912*^9, 3.8879660634819803`*^9}, {
   3.887966133864917*^9, 3.887966137590062*^9}, {3.887966359836275*^9, 
   3.8879663630671144`*^9}, {3.887966449090169*^9, 3.8879664514940014`*^9}, {
   3.887966602208398*^9, 3.887966611164839*^9}, {3.8879668749167233`*^9, 
   3.8879668798968*^9}, {3.8879669705507526`*^9, 3.887966970816455*^9}, {
   3.8879673095397377`*^9, 3.8879673158379307`*^9}, {3.887967433828303*^9, 
   3.8879674371557417`*^9}, {3.8879675343121443`*^9, 3.887967534740281*^9}, {
   3.88796759796113*^9, 3.8879675981746144`*^9}, {3.887967695265628*^9, 
   3.887967695721452*^9}, {3.88796780334971*^9, 3.8879678038990126`*^9}, {
   3.887967909734336*^9, 3.8879679136520824`*^9}, {3.887968570531082*^9, 
   3.887968578534693*^9}, {3.887968677423256*^9, 3.887968680667802*^9}, {
   3.8879688130792522`*^9, 3.88796881349642*^9}, {3.8879689251234937`*^9, 
   3.887968925487956*^9}, {3.8879690079378166`*^9, 3.8879690082431283`*^9}, {
   3.8879694723470616`*^9, 3.88796947375495*^9}, {3.8879697806693225`*^9, 
   3.887969782082811*^9}, {3.887970047713642*^9, 3.8879700480201416`*^9}, {
   3.8879702421202164`*^9, 3.8879702429331045`*^9}, 3.8879703727622285`*^9, {
   3.8879705218642545`*^9, 3.887970522645321*^9}, {3.887970598814562*^9, 
   3.8879706063178205`*^9}, {3.8879709681614485`*^9, 
   3.8879709690866327`*^9}, {3.88797107118433*^9, 3.887971072174284*^9}, {
   3.8879711820565925`*^9, 3.8879711827422047`*^9}, {3.8879720958273087`*^9, 
   3.887972106108347*^9}, {3.8879724424107504`*^9, 3.8879724488884497`*^9}},
 CellLabel->
  "In[634]:=",ExpressionUUID->"bcbf7486-8264-40ff-8a51-faef72e1559d"],

Cell[BoxData[
 InterpretationBox[
  RowBox[{"\<\"\[CurlyEpsilon]*\\!\\(\\*SuperscriptBox[\\(Wi\\), \\(2\\)]\\)= \
  \"\>", "\[InvisibleSpace]", 
   FractionBox[
    SuperscriptBox["Wi", "2"], "20"]}],
  SequenceForm[
  "\[CurlyEpsilon]*\!\(\*SuperscriptBox[\(Wi\), \(2\)]\)=   ", 
   Rational[1, 20] $CellContext`Wi^2],
  Editable->False]], "Print",
 CellChangeTimes->{
  3.8879635898488126`*^9, 3.887963686151635*^9, 3.8879638292541227`*^9, 
   3.887963903348322*^9, 3.8879640417430663`*^9, 3.887964218634035*^9, {
   3.8879644161880198`*^9, 3.8879644364425707`*^9}, 3.8879646961743445`*^9, {
   3.8879649783516493`*^9, 3.8879649847285585`*^9}, 3.8879651650347614`*^9, 
   3.8879653712859545`*^9, 3.8879656811997256`*^9, 3.88796586948359*^9, 
   3.8879660684897947`*^9, 3.887966141008133*^9, 3.887966367224287*^9, 
   3.8879664548861003`*^9, 3.8879666150090303`*^9, 3.8879668835872355`*^9, 
   3.887966973695877*^9, 3.8879673310529337`*^9, 3.887967440081849*^9, 
   3.8879675379437246`*^9, 3.887967601520026*^9, 3.8879676989095087`*^9, 
   3.8879678074321337`*^9, 3.887968303736398*^9, 3.887968581565543*^9, 
   3.88796868416262*^9, 3.887968816515358*^9, 3.887968928093988*^9, 
   3.887969011053504*^9, 3.8879694768406463`*^9, 3.8879697854195547`*^9, 
   3.887970051286783*^9, 3.887970246378689*^9, 3.887970376408228*^9, 
   3.8879705263029623`*^9, 3.887970609314238*^9, 3.887970972237138*^9, 
   3.887971075173827*^9, 3.887971187222447*^9, {3.887972099925048*^9, 
   3.8879721131476307`*^9}, 3.8879724519849343`*^9},
 CellLabel->
  "During evaluation of \
In[634]:=",ExpressionUUID->"cb836a7c-5dd9-4a3e-8342-df9e21f3eb47"],

Cell[BoxData[
 TemplateBox[{
  "FindRoot", "precw", 
   "\"The precision of the argument function (\\!\\(\\*RowBox[{\\\"{\\\", \
RowBox[{RowBox[{RowBox[{FractionBox[\\\"1\\\", \\\"2\\\"], \\\" \\\", \
RowBox[{\\\"(\\\", RowBox[{RowBox[{\\\"1.`\\\", \\\" \\\", RowBox[{\\\"(\\\", \
RowBox[{RowBox[{\\\"-\\\", FractionBox[\\\"3\\\", \\\"2\\\"]}], \\\"+\\\", \
RowBox[{\\\"4\\\", \\\" \\\", RowBox[{\\\"Power\\\", \\\"[\\\", RowBox[{\\\"\
\[LeftSkeleton]\\\", \\\"2\\\", \\\"\[RightSkeleton]\\\"}], \\\"]\\\"}], \\\" \
\\\", RowBox[{\\\"Log\\\", \\\"[\\\", RowBox[{\\\"\[LeftSkeleton]\\\", \
\\\"1\\\", \\\"\[RightSkeleton]\\\"}], \\\"]\\\"}]}]}], \\\")\\\"}]}], \
\\\"+\\\", RowBox[{\\\"0.027201631303275433`\\\", \\\" \\\", \
SuperscriptBox[\\\"Wi\\\", \\\"2\\\"], \\\" \\\", RowBox[{\\\"(\\\", \
RowBox[{RowBox[{\\\"-\\\", FractionBox[\\\"15\\\", \\\"4\\\"]}], \\\"+\\\", \
RowBox[{\\\"18\\\", \\\" \\\", RowBox[{\\\"Power\\\", \\\"[\\\", RowBox[{\\\"\
\[LeftSkeleton]\\\", \\\"2\\\", \\\"\[RightSkeleton]\\\"}], \\\"]\\\"}]}], \\\
\"+\\\", RowBox[{\\\"24\\\", \\\" \\\", RowBox[{\\\"Power\\\", \\\"[\\\", \
RowBox[{\\\"\[LeftSkeleton]\\\", \\\"2\\\", \\\"\[RightSkeleton]\\\"}], \\\"]\
\\\"}]}], \\\"-\\\", RowBox[{\\\"48\\\", \\\" \\\", RowBox[{\\\"Power\\\", \\\
\"[\\\", RowBox[{\\\"\[LeftSkeleton]\\\", \\\"2\\\", \
\\\"\[RightSkeleton]\\\"}], \\\"]\\\"}], \\\" \\\", RowBox[{\\\"Log\\\", \
\\\"[\\\", RowBox[{\\\"\[LeftSkeleton]\\\", \\\"1\\\", \\\"\[RightSkeleton]\\\
\"}], \\\"]\\\"}]}]}], \\\")\\\"}]}], \\\"+\\\", \
RowBox[{\\\"0.0004701579862897969`\\\", \\\" \\\", SuperscriptBox[\\\"Wi\\\", \
\\\"4\\\"], \\\" \\\", RowBox[{\\\"(\\\", RowBox[{RowBox[{\\\"-\\\", \
FractionBox[\\\"21\\\", \\\"2\\\"]}], \\\"+\\\", RowBox[{\\\"75\\\", \\\" \
\\\", RowBox[{\\\"Power\\\", \\\"[\\\", RowBox[{\\\"\[LeftSkeleton]\\\", \
\\\"2\\\", \\\"\[RightSkeleton]\\\"}], \\\"]\\\"}]}], \\\"-\\\", \
RowBox[{\\\"240\\\", \\\" \\\", RowBox[{\\\"Power\\\", \\\"[\\\", \
RowBox[{\\\"\[LeftSkeleton]\\\", \\\"2\\\", \\\"\[RightSkeleton]\\\"}], \\\"]\
\\\"}]}], \\\"-\\\", RowBox[{\\\"480\\\", \\\" \\\", RowBox[{\\\"Power\\\", \
\\\"[\\\", RowBox[{\\\"\[LeftSkeleton]\\\", \\\"2\\\", \\\"\[RightSkeleton]\\\
\"}], \\\"]\\\"}]}], \\\"+\\\", RowBox[{\\\"240\\\", \\\" \\\", \
RowBox[{\\\"Power\\\", \\\"[\\\", RowBox[{\\\"\[LeftSkeleton]\\\", \\\"2\\\", \
\\\"\[RightSkeleton]\\\"}], \\\"]\\\"}]}], \\\"+\\\", RowBox[{\\\"640\\\", \\\
\" \\\", RowBox[{\\\"Power\\\", \\\"[\\\", RowBox[{\\\"\[LeftSkeleton]\\\", \
\\\"2\\\", \\\"\[RightSkeleton]\\\"}], \\\"]\\\"}], \\\" \\\", \
RowBox[{\\\"Log\\\", \\\"[\\\", RowBox[{\\\"\[LeftSkeleton]\\\", \\\"1\\\", \
\\\"\[RightSkeleton]\\\"}], \\\"]\\\"}]}]}], \\\")\\\"}]}], \\\"+\\\", \
RowBox[{\\\"6.1292369517824285`*^-6\\\", \\\" \\\", \
SuperscriptBox[\\\"Wi\\\", \\\"6\\\"], \\\" \\\", RowBox[{\\\"(\\\", \
RowBox[{RowBox[{\\\"-\\\", FractionBox[\\\"255\\\", \\\"8\\\"]}], \\\"+\\\", \
RowBox[{\\\"294\\\", \\\" \\\", RowBox[{\\\"Power\\\", \\\"[\\\", \
RowBox[{\\\"\[LeftSkeleton]\\\", \\\"2\\\", \\\"\[RightSkeleton]\\\"}], \\\"]\
\\\"}]}], \\\"-\\\", RowBox[{\\\"1260\\\", \\\" \\\", RowBox[{\\\"Power\\\", \
\\\"[\\\", RowBox[{\\\"\[LeftSkeleton]\\\", \\\"2\\\", \\\"\[RightSkeleton]\\\
\"}], \\\"]\\\"}]}], \\\"+\\\", RowBox[{\\\"3360\\\", \\\" \\\", \
RowBox[{\\\"Power\\\", \\\"[\\\", RowBox[{\\\"\[LeftSkeleton]\\\", \\\"2\\\", \
\\\"\[RightSkeleton]\\\"}], \\\"]\\\"}]}], \\\"+\\\", RowBox[{\\\"8064\\\", \
\\\" \\\", RowBox[{\\\"Power\\\", \\\"[\\\", RowBox[{\\\"\[LeftSkeleton]\\\", \
\\\"2\\\", \\\"\[RightSkeleton]\\\"}], \\\"]\\\"}]}], \\\"-\\\", \
RowBox[{\\\"6720\\\", \\\" \\\", RowBox[{\\\"Power\\\", \\\"[\\\", RowBox[{\\\
\"\[LeftSkeleton]\\\", \\\"2\\\", \\\"\[RightSkeleton]\\\"}], \\\"]\\\"}]}], \
\\\"+\\\", RowBox[{\\\"2688\\\", \\\" \\\", RowBox[{\\\"Power\\\", \\\"[\\\", \
RowBox[{\\\"\[LeftSkeleton]\\\", \\\"2\\\", \\\"\[RightSkeleton]\\\"}], \\\"]\
\\\"}]}], \\\"-\\\", RowBox[{\\\"8960\\\", \\\" \\\", RowBox[{\\\"Power\\\", \
\\\"[\\\", RowBox[{\\\"\[LeftSkeleton]\\\", \\\"2\\\", \\\"\[RightSkeleton]\\\
\"}], \\\"]\\\"}], \\\" \\\", RowBox[{\\\"Log\\\", \\\"[\\\", RowBox[{\\\"\
\[LeftSkeleton]\\\", \\\"1\\\", \\\"\[RightSkeleton]\\\"}], \\\"]\\\"}]}]}], \
\\\")\\\"}]}], \\\"+\\\", RowBox[{\\\"6.510416666666667`*^-8\\\", \\\" \\\", \
SuperscriptBox[\\\"Wi\\\", \\\"8\\\"], \\\" \\\", RowBox[{\\\"(\\\", \
RowBox[{RowBox[{\\\"-\\\", FractionBox[\\\"1023\\\", \\\"10\\\"]}], \
\\\"+\\\", RowBox[{\\\"\[LeftSkeleton]\\\", \\\"12\\\", \
\\\"\[RightSkeleton]\\\"}], \\\"+\\\", RowBox[{\\\"\[LeftSkeleton]\\\", \\\"1\
\\\", \\\"\[RightSkeleton]\\\"}]}], \\\")\\\"}]}], \\\"+\\\", RowBox[{\\\"\
\[LeftSkeleton]\\\", \\\"1\\\", \\\"\[RightSkeleton]\\\"}], \\\"+\\\", \
RowBox[{\\\"\[LeftSkeleton]\\\", \\\"1\\\", \\\"\[RightSkeleton]\\\"}], \\\"+\
\\\", RowBox[{\\\"3.301679030264183`*^-14\\\", \\\" \\\", \
SuperscriptBox[\\\"Wi\\\", \\\"14\\\"], \\\" \\\", RowBox[{\\\"(\\\", \
RowBox[{RowBox[{\\\"-\\\", FractionBox[\\\"65535\\\", \\\"16\\\"]}], \
\\\"+\\\", RowBox[{\\\"\[LeftSkeleton]\\\", \\\"13\\\", \
\\\"\[RightSkeleton]\\\"}], \\\"+\\\", RowBox[{\\\"\[LeftSkeleton]\\\", \\\"6\
\\\", \\\"\[RightSkeleton]\\\"}]}], \\\")\\\"}]}], \\\"+\\\", \
RowBox[{\\\"2.1192762586805557`*^-16\\\", \\\" \\\", \
SuperscriptBox[\\\"Wi\\\", \\\"16\\\"], \\\" \\\", RowBox[{\\\"(\\\", \
RowBox[{RowBox[{\\\"-\\\", FractionBox[\\\"29127\\\", \\\"2\\\"]}], \
\\\"+\\\", RowBox[{FractionBox[\\\"1114095\\\", \\\"4\\\"], \\\" \\\", \
RowBox[{\\\"Power\\\", \\\"[\\\", RowBox[{\\\"\[LeftSkeleton]\\\", \\\"2\\\", \
\\\"\[RightSkeleton]\\\"}], \\\"]\\\"}]}], \\\"-\\\", \
RowBox[{FractionBox[\\\"17824704\\\", \\\"7\\\"], \\\" \\\", \
RowBox[{\\\"Power\\\", \\\"[\\\", RowBox[{\\\"\[LeftSkeleton]\\\", \\\"2\\\", \
\\\"\[RightSkeleton]\\\"}], \\\"]\\\"}]}], \\\"+\\\", \
RowBox[{\\\"14851200\\\", \\\" \\\", RowBox[{\\\"Power\\\", \\\"[\\\", \
RowBox[{\\\"\[LeftSkeleton]\\\", \\\"2\\\", \\\"\[RightSkeleton]\\\"}], \\\"]\
\\\"}]}], \\\"-\\\", RowBox[{\\\"62329344\\\", \\\" \\\", RowBox[{\\\"Power\\\
\", \\\"[\\\", RowBox[{\\\"\[LeftSkeleton]\\\", \\\"2\\\", \\\"\
\[RightSkeleton]\\\"}], \\\"]\\\"}]}], \\\"+\\\", RowBox[{\\\"201976320\\\", \
\\\" \\\", RowBox[{\\\"Power\\\", \\\"[\\\", RowBox[{\\\"\[LeftSkeleton]\\\", \
\\\"2\\\", \\\"\[RightSkeleton]\\\"}], \\\"]\\\"}]}], \\\"-\\\", \
RowBox[{\\\"532267008\\\", \\\" \\\", RowBox[{\\\"Power\\\", \\\"[\\\", \
RowBox[{\\\"\[LeftSkeleton]\\\", \\\"2\\\", \\\"\[RightSkeleton]\\\"}], \\\"]\
\\\"}]}], \\\"+\\\", RowBox[{\\\"1194885120\\\", \\\" \\\", RowBox[{\\\"Power\
\\\", \\\"[\\\", RowBox[{\\\"\[LeftSkeleton]\\\", \\\"2\\\", \\\"\
\[RightSkeleton]\\\"}], \\\"]\\\"}]}], \\\"-\\\", RowBox[{\\\"2389770240\\\", \
\\\" \\\", RowBox[{\\\"Power\\\", \\\"[\\\", RowBox[{\\\"\[LeftSkeleton]\\\", \
\\\"2\\\", \\\"\[RightSkeleton]\\\"}], \\\"]\\\"}]}], \\\"-\\\", \
RowBox[{\\\"7647264768\\\", \\\" \\\", RowBox[{\\\"Power\\\", \\\"[\\\", \
RowBox[{\\\"\[LeftSkeleton]\\\", \\\"2\\\", \\\"\[RightSkeleton]\\\"}], \\\"]\
\\\"}]}], \\\"+\\\", RowBox[{\\\"\[LeftSkeleton]\\\", \\\"8\\\", \\\"\
\[RightSkeleton]\\\"}]}], \\\")\\\"}]}], \\\"+\\\", \
RowBox[{\\\"1.2475207609528246`*^-18\\\", \\\" \\\", \
SuperscriptBox[\\\"Wi\\\", \\\"18\\\"], \\\" \\\", RowBox[{\\\"(\\\", \
RowBox[{RowBox[{\\\"-\\\", FractionBox[\\\"209715\\\", \\\"4\\\"]}], \
\\\"+\\\", RowBox[{\\\"1106826\\\", \\\" \\\", RowBox[{\\\"Power\\\", \\\"[\\\
\", RowBox[{\\\"\[LeftSkeleton]\\\", \\\"2\\\", \\\"\[RightSkeleton]\\\"}], \
\\\"]\\\"}]}], \\\"-\\\", RowBox[{\\\"11206485\\\", \\\" \\\", \
RowBox[{\\\"Power\\\", \\\"[\\\", RowBox[{\\\"\[LeftSkeleton]\\\", \\\"2\\\", \
\\\"\[RightSkeleton]\\\"}], \\\"]\\\"}]}], \\\"+\\\", \
RowBox[{FractionBox[\\\"508004064\\\", \\\"7\\\"], \\\" \\\", \
RowBox[{\\\"Power\\\", \\\"[\\\", RowBox[{\\\"\[LeftSkeleton]\\\", \\\"2\\\", \
\\\"\[RightSkeleton]\\\"}], \\\"]\\\"}]}], \\\"-\\\", RowBox[{\\\"338607360\\\
\", \\\" \\\", RowBox[{\\\"Power\\\", \\\"[\\\", \
RowBox[{\\\"\[LeftSkeleton]\\\", \\\"2\\\", \\\"\[RightSkeleton]\\\"}], \\\"]\
\\\"}]}], \\\"+\\\", RowBox[{FractionBox[\\\"6090467328\\\", \\\"5\\\"], \\\" \
\\\", RowBox[{\\\"Power\\\", \\\"[\\\", RowBox[{\\\"\[LeftSkeleton]\\\", \
\\\"2\\\", \\\"\[RightSkeleton]\\\"}], \\\"]\\\"}]}], \\\"-\\\", \
RowBox[{\\\"3542353920\\\", \\\" \\\", RowBox[{\\\"Power\\\", \\\"[\\\", \
RowBox[{\\\"\[LeftSkeleton]\\\", \\\"2\\\", \\\"\[RightSkeleton]\\\"}], \\\"]\
\\\"}]}], \\\"+\\\", RowBox[{\\\"8668348416\\\", \\\" \\\", RowBox[{\\\"Power\
\\\", \\\"[\\\", RowBox[{\\\"\[LeftSkeleton]\\\", \\\"2\\\", \\\"\
\[RightSkeleton]\\\"}], \\\"]\\\"}]}], \\\"-\\\", \
RowBox[{\\\"18575032320\\\", \\\" \\\", RowBox[{\\\"Power\\\", \\\"[\\\", \
RowBox[{\\\"\[LeftSkeleton]\\\", \\\"2\\\", \\\"\[RightSkeleton]\\\"}], \\\"]\
\\\"}]}], \\\"+\\\", RowBox[{\\\"36324507648\\\", \\\" \\\", \
RowBox[{\\\"Power\\\", \\\"[\\\", RowBox[{\\\"\[LeftSkeleton]\\\", \\\"2\\\", \
\\\"\[RightSkeleton]\\\"}], \\\"]\\\"}]}], \\\"+\\\", RowBox[{\\\"\
\[LeftSkeleton]\\\", \\\"10\\\", \\\"\[RightSkeleton]\\\"}]}], \\\")\\\"}]}], \
\\\"+\\\", RowBox[{\\\"\[LeftSkeleton]\\\", \\\"91\\\", \
\\\"\[RightSkeleton]\\\"}]}], \\\")\\\"}]}], \\\"\[Equal]\\\", \\\"0\\\"}], \
\\\",\\\", RowBox[{RowBox[{\\\"\[LeftSkeleton]\\\", \\\"1\\\", \\\"\
\[RightSkeleton]\\\"}], \\\"\[Equal]\\\", \\\"0\\\"}]}], \\\"}\\\"}]\\)) is \
less than WorkingPrecision (\\!\\(\\*RowBox[{\\\"12.`\\\"}]\\)).\"", 2, 639, 
   376, 32769373366592488388, "Local"},
  "MessageTemplate"]], "Message", "MSG",
 CellChangeTimes->{
  3.887965031737943*^9, 3.8879652123189173`*^9, 3.887965417000168*^9, 
   3.887965728905177*^9, 3.8879659161735907`*^9, 3.887966115180301*^9, 
   3.8879661891299257`*^9, 3.8879664148931675`*^9, 3.8879665022605705`*^9, 
   3.8879666625737953`*^9, 3.8879669317615466`*^9, 3.8879670210833592`*^9, 
   3.8879673786443424`*^9, 3.887967488328502*^9, 3.8879675849834905`*^9, 
   3.8879676488273253`*^9, 3.8879677466846066`*^9, 3.8879678553672285`*^9, 
   3.8879683494231215`*^9, 3.887968628593502*^9, 3.887968730432227*^9, 
   3.8879688623894515`*^9, 3.8879689739305115`*^9, 3.8879690574214363`*^9, 
   3.8879695226138687`*^9, 3.8879698308382177`*^9, 3.8879700964935255`*^9, 
   3.887970292364027*^9, 3.8879704217738533`*^9, 3.887970572138345*^9, 
   3.8879706547331147`*^9, 3.887971017101164*^9, 3.887971119970167*^9, 
   3.8879712337596645`*^9, {3.887972100059926*^9, 3.8879721132818823`*^9}, 
   3.8879724981213956`*^9},
 CellLabel->
  "During evaluation of \
In[634]:=",ExpressionUUID->"834e8aa0-c3ca-4061-bf7d-0192c6354dd0"],

Cell[BoxData[
 TemplateBox[{
  "General", "munfl", 
   "\"\\!\\(\\*RowBox[{\\\"1.0000000000000141`*^-136\\\", \\\" \\\", \
\\\"7.400746716149113306659322525113737135`12.*^-176\\\"}]\\) is too small to \
represent as a normalized machine number; precision may be lost.\"", 2, 639, 
   377, 32769373366592488388, "Local"},
  "MessageTemplate"]], "Message", "MSG",
 CellChangeTimes->{
  3.887965031737943*^9, 3.8879652123189173`*^9, 3.887965417000168*^9, 
   3.887965728905177*^9, 3.8879659161735907`*^9, 3.887966115180301*^9, 
   3.8879661891299257`*^9, 3.8879664148931675`*^9, 3.8879665022605705`*^9, 
   3.8879666625737953`*^9, 3.8879669317615466`*^9, 3.8879670210833592`*^9, 
   3.8879673786443424`*^9, 3.887967488328502*^9, 3.8879675849834905`*^9, 
   3.8879676488273253`*^9, 3.8879677466846066`*^9, 3.8879678553672285`*^9, 
   3.8879683494231215`*^9, 3.887968628593502*^9, 3.887968730432227*^9, 
   3.8879688623894515`*^9, 3.8879689739305115`*^9, 3.8879690574214363`*^9, 
   3.8879695226138687`*^9, 3.8879698308382177`*^9, 3.8879700964935255`*^9, 
   3.887970292364027*^9, 3.8879704217738533`*^9, 3.887970572138345*^9, 
   3.8879706547331147`*^9, 3.887971017101164*^9, 3.887971119970167*^9, 
   3.8879712337596645`*^9, {3.887972100059926*^9, 3.8879721132818823`*^9}, 
   3.887972498203755*^9},
 CellLabel->
  "During evaluation of \
In[634]:=",ExpressionUUID->"c3e67a2b-485c-4f18-83f9-f43b864aab90"],

Cell[BoxData[
 TemplateBox[{
  "General", "munfl", 
   "\"\\!\\(\\*RowBox[{\\\"1.0000000000000144`*^-138\\\", \\\" \\\", \
\\\"9.571825248495578084302594454511193`12.*^-179\\\"}]\\) is too small to \
represent as a normalized machine number; precision may be lost.\"", 2, 639, 
   378, 32769373366592488388, "Local"},
  "MessageTemplate"]], "Message", "MSG",
 CellChangeTimes->{
  3.887965031737943*^9, 3.8879652123189173`*^9, 3.887965417000168*^9, 
   3.887965728905177*^9, 3.8879659161735907`*^9, 3.887966115180301*^9, 
   3.8879661891299257`*^9, 3.8879664148931675`*^9, 3.8879665022605705`*^9, 
   3.8879666625737953`*^9, 3.8879669317615466`*^9, 3.8879670210833592`*^9, 
   3.8879673786443424`*^9, 3.887967488328502*^9, 3.8879675849834905`*^9, 
   3.8879676488273253`*^9, 3.8879677466846066`*^9, 3.8879678553672285`*^9, 
   3.8879683494231215`*^9, 3.887968628593502*^9, 3.887968730432227*^9, 
   3.8879688623894515`*^9, 3.8879689739305115`*^9, 3.8879690574214363`*^9, 
   3.8879695226138687`*^9, 3.8879698308382177`*^9, 3.8879700964935255`*^9, 
   3.887970292364027*^9, 3.8879704217738533`*^9, 3.887970572138345*^9, 
   3.8879706547331147`*^9, 3.887971017101164*^9, 3.887971119970167*^9, 
   3.8879712337596645`*^9, {3.887972100059926*^9, 3.8879721132818823`*^9}, 
   3.8879724982426615`*^9},
 CellLabel->
  "During evaluation of \
In[634]:=",ExpressionUUID->"d50e8efd-6624-4859-be89-4f83e4752ec3"],

Cell[BoxData[
 TemplateBox[{
  "General", "munfl", 
   "\"\\!\\(\\*RowBox[{\\\"1.0000000000000144`*^-140\\\", \\\" \\\", \
\\\"1.2247248906055490087390260619029`12.*^-181\\\"}]\\) is too small to \
represent as a normalized machine number; precision may be lost.\"", 2, 639, 
   379, 32769373366592488388, "Local"},
  "MessageTemplate"]], "Message", "MSG",
 CellChangeTimes->{
  3.887965031737943*^9, 3.8879652123189173`*^9, 3.887965417000168*^9, 
   3.887965728905177*^9, 3.8879659161735907`*^9, 3.887966115180301*^9, 
   3.8879661891299257`*^9, 3.8879664148931675`*^9, 3.8879665022605705`*^9, 
   3.8879666625737953`*^9, 3.8879669317615466`*^9, 3.8879670210833592`*^9, 
   3.8879673786443424`*^9, 3.887967488328502*^9, 3.8879675849834905`*^9, 
   3.8879676488273253`*^9, 3.8879677466846066`*^9, 3.8879678553672285`*^9, 
   3.8879683494231215`*^9, 3.887968628593502*^9, 3.887968730432227*^9, 
   3.8879688623894515`*^9, 3.8879689739305115`*^9, 3.8879690574214363`*^9, 
   3.8879695226138687`*^9, 3.8879698308382177`*^9, 3.8879700964935255`*^9, 
   3.887970292364027*^9, 3.8879704217738533`*^9, 3.887970572138345*^9, 
   3.8879706547331147`*^9, 3.887971017101164*^9, 3.887971119970167*^9, 
   3.8879712337596645`*^9, {3.887972100059926*^9, 3.8879721132818823`*^9}, 
   3.887972498258816*^9},
 CellLabel->
  "During evaluation of \
In[634]:=",ExpressionUUID->"c167f837-3283-4a8b-adce-143feba5bb0d"],

Cell[BoxData[
 TemplateBox[{
  "General", "stop", 
   "\"Further output of \\!\\(\\*StyleBox[RowBox[{\\\"General\\\", \
\\\"::\\\", \\\"munfl\\\"}], \\\"MessageName\\\"]\\) will be suppressed \
during this calculation.\"", 2, 639, 380, 32769373366592488388, "Local"},
  "MessageTemplate"]], "Message", "MSG",
 CellChangeTimes->{
  3.887965031737943*^9, 3.8879652123189173`*^9, 3.887965417000168*^9, 
   3.887965728905177*^9, 3.8879659161735907`*^9, 3.887966115180301*^9, 
   3.8879661891299257`*^9, 3.8879664148931675`*^9, 3.8879665022605705`*^9, 
   3.8879666625737953`*^9, 3.8879669317615466`*^9, 3.8879670210833592`*^9, 
   3.8879673786443424`*^9, 3.887967488328502*^9, 3.8879675849834905`*^9, 
   3.8879676488273253`*^9, 3.8879677466846066`*^9, 3.8879678553672285`*^9, 
   3.8879683494231215`*^9, 3.887968628593502*^9, 3.887968730432227*^9, 
   3.8879688623894515`*^9, 3.8879689739305115`*^9, 3.8879690574214363`*^9, 
   3.8879695226138687`*^9, 3.8879698308382177`*^9, 3.8879700964935255`*^9, 
   3.887970292364027*^9, 3.8879704217738533`*^9, 3.887970572138345*^9, 
   3.8879706547331147`*^9, 3.887971017101164*^9, 3.887971119970167*^9, 
   3.8879712337596645`*^9, {3.887972100059926*^9, 3.8879721132818823`*^9}, 
   3.887972498299014*^9},
 CellLabel->
  "During evaluation of \
In[634]:=",ExpressionUUID->"101ce4e1-ccf3-4c63-9171-2b9368367239"],

Cell[BoxData[
 TemplateBox[{
  "Divide", "infy", 
   "\"Infinite expression \\!\\(\\*FractionBox[\\\"1\\\", \\\"0\\\"]\\) \
encountered.\"", 2, 639, 381, 32769373366592488388, "Local"},
  "MessageTemplate"]], "Message", "MSG",
 CellChangeTimes->{
  3.887965031737943*^9, 3.8879652123189173`*^9, 3.887965417000168*^9, 
   3.887965728905177*^9, 3.8879659161735907`*^9, 3.887966115180301*^9, 
   3.8879661891299257`*^9, 3.8879664148931675`*^9, 3.8879665022605705`*^9, 
   3.8879666625737953`*^9, 3.8879669317615466`*^9, 3.8879670210833592`*^9, 
   3.8879673786443424`*^9, 3.887967488328502*^9, 3.8879675849834905`*^9, 
   3.8879676488273253`*^9, 3.8879677466846066`*^9, 3.8879678553672285`*^9, 
   3.8879683494231215`*^9, 3.887968628593502*^9, 3.887968730432227*^9, 
   3.8879688623894515`*^9, 3.8879689739305115`*^9, 3.8879690574214363`*^9, 
   3.8879695226138687`*^9, 3.8879698308382177`*^9, 3.8879700964935255`*^9, 
   3.887970292364027*^9, 3.8879704217738533`*^9, 3.887970572138345*^9, 
   3.8879706547331147`*^9, 3.887971017101164*^9, 3.887971119970167*^9, 
   3.8879712337596645`*^9, {3.887972100059926*^9, 3.8879721132818823`*^9}, 
   3.8879724985021772`*^9},
 CellLabel->
  "During evaluation of \
In[634]:=",ExpressionUUID->"f64fa1e8-3ecb-4a7e-9305-69bfb2c18d7e"],

Cell[BoxData[
 TemplateBox[{
  "Infinity", "indet", 
   "\"Indeterminate expression \\!\\(\\*RowBox[{\\\"0\\\", \\\" \\\", \
\\\"ComplexInfinity\\\"}]\\) encountered.\"", 2, 639, 382, 
   32769373366592488388, "Local"},
  "MessageTemplate"]], "Message", "MSG",
 CellChangeTimes->{
  3.887965031737943*^9, 3.8879652123189173`*^9, 3.887965417000168*^9, 
   3.887965728905177*^9, 3.8879659161735907`*^9, 3.887966115180301*^9, 
   3.8879661891299257`*^9, 3.8879664148931675`*^9, 3.8879665022605705`*^9, 
   3.8879666625737953`*^9, 3.8879669317615466`*^9, 3.8879670210833592`*^9, 
   3.8879673786443424`*^9, 3.887967488328502*^9, 3.8879675849834905`*^9, 
   3.8879676488273253`*^9, 3.8879677466846066`*^9, 3.8879678553672285`*^9, 
   3.8879683494231215`*^9, 3.887968628593502*^9, 3.887968730432227*^9, 
   3.8879688623894515`*^9, 3.8879689739305115`*^9, 3.8879690574214363`*^9, 
   3.8879695226138687`*^9, 3.8879698308382177`*^9, 3.8879700964935255`*^9, 
   3.887970292364027*^9, 3.8879704217738533`*^9, 3.887970572138345*^9, 
   3.8879706547331147`*^9, 3.887971017101164*^9, 3.887971119970167*^9, 
   3.8879712337596645`*^9, {3.887972100059926*^9, 3.8879721132818823`*^9}, 
   3.8879724985113244`*^9},
 CellLabel->
  "During evaluation of \
In[634]:=",ExpressionUUID->"15119591-da95-4a19-93af-e9b10c1faac9"],

Cell[BoxData[
 TemplateBox[{
  "Divide", "infy", 
   "\"Infinite expression \\!\\(\\*FractionBox[\\\"1\\\", \\\"0\\\"]\\) \
encountered.\"", 2, 639, 383, 32769373366592488388, "Local"},
  "MessageTemplate"]], "Message", "MSG",
 CellChangeTimes->{
  3.887965031737943*^9, 3.8879652123189173`*^9, 3.887965417000168*^9, 
   3.887965728905177*^9, 3.8879659161735907`*^9, 3.887966115180301*^9, 
   3.8879661891299257`*^9, 3.8879664148931675`*^9, 3.8879665022605705`*^9, 
   3.8879666625737953`*^9, 3.8879669317615466`*^9, 3.8879670210833592`*^9, 
   3.8879673786443424`*^9, 3.887967488328502*^9, 3.8879675849834905`*^9, 
   3.8879676488273253`*^9, 3.8879677466846066`*^9, 3.8879678553672285`*^9, 
   3.8879683494231215`*^9, 3.887968628593502*^9, 3.887968730432227*^9, 
   3.8879688623894515`*^9, 3.8879689739305115`*^9, 3.8879690574214363`*^9, 
   3.8879695226138687`*^9, 3.8879698308382177`*^9, 3.8879700964935255`*^9, 
   3.887970292364027*^9, 3.8879704217738533`*^9, 3.887970572138345*^9, 
   3.8879706547331147`*^9, 3.887971017101164*^9, 3.887971119970167*^9, 
   3.8879712337596645`*^9, {3.887972100059926*^9, 3.8879721132818823`*^9}, 
   3.8879724985206985`*^9},
 CellLabel->
  "During evaluation of \
In[634]:=",ExpressionUUID->"3fc30914-9d2a-4c0d-9777-1273004666d3"],

Cell[BoxData[
 TemplateBox[{
  "Divide", "infy", 
   "\"Infinite expression \\!\\(\\*FractionBox[\\\"1\\\", \\\"0\\\"]\\) \
encountered.\"", 2, 639, 384, 32769373366592488388, "Local"},
  "MessageTemplate"]], "Message", "MSG",
 CellChangeTimes->{
  3.887965031737943*^9, 3.8879652123189173`*^9, 3.887965417000168*^9, 
   3.887965728905177*^9, 3.8879659161735907`*^9, 3.887966115180301*^9, 
   3.8879661891299257`*^9, 3.8879664148931675`*^9, 3.8879665022605705`*^9, 
   3.8879666625737953`*^9, 3.8879669317615466`*^9, 3.8879670210833592`*^9, 
   3.8879673786443424`*^9, 3.887967488328502*^9, 3.8879675849834905`*^9, 
   3.8879676488273253`*^9, 3.8879677466846066`*^9, 3.8879678553672285`*^9, 
   3.8879683494231215`*^9, 3.887968628593502*^9, 3.887968730432227*^9, 
   3.8879688623894515`*^9, 3.8879689739305115`*^9, 3.8879690574214363`*^9, 
   3.8879695226138687`*^9, 3.8879698308382177`*^9, 3.8879700964935255`*^9, 
   3.887970292364027*^9, 3.8879704217738533`*^9, 3.887970572138345*^9, 
   3.8879706547331147`*^9, 3.887971017101164*^9, 3.887971119970167*^9, 
   3.8879712337596645`*^9, {3.887972100059926*^9, 3.8879721132818823`*^9}, 
   3.8879724985626*^9},
 CellLabel->
  "During evaluation of \
In[634]:=",ExpressionUUID->"ad8c5072-739c-4dbe-b5c1-997a760b23d5"],

Cell[BoxData[
 TemplateBox[{
  "General", "stop", 
   "\"Further output of \\!\\(\\*StyleBox[RowBox[{\\\"Divide\\\", \\\"::\\\", \
\\\"infy\\\"}], \\\"MessageName\\\"]\\) will be suppressed during this \
calculation.\"", 2, 639, 385, 32769373366592488388, "Local"},
  "MessageTemplate"]], "Message", "MSG",
 CellChangeTimes->{
  3.887965031737943*^9, 3.8879652123189173`*^9, 3.887965417000168*^9, 
   3.887965728905177*^9, 3.8879659161735907`*^9, 3.887966115180301*^9, 
   3.8879661891299257`*^9, 3.8879664148931675`*^9, 3.8879665022605705`*^9, 
   3.8879666625737953`*^9, 3.8879669317615466`*^9, 3.8879670210833592`*^9, 
   3.8879673786443424`*^9, 3.887967488328502*^9, 3.8879675849834905`*^9, 
   3.8879676488273253`*^9, 3.8879677466846066`*^9, 3.8879678553672285`*^9, 
   3.8879683494231215`*^9, 3.887968628593502*^9, 3.887968730432227*^9, 
   3.8879688623894515`*^9, 3.8879689739305115`*^9, 3.8879690574214363`*^9, 
   3.8879695226138687`*^9, 3.8879698308382177`*^9, 3.8879700964935255`*^9, 
   3.887970292364027*^9, 3.8879704217738533`*^9, 3.887970572138345*^9, 
   3.8879706547331147`*^9, 3.887971017101164*^9, 3.887971119970167*^9, 
   3.8879712337596645`*^9, {3.887972100059926*^9, 3.8879721132818823`*^9}, 
   3.8879724985791855`*^9},
 CellLabel->
  "During evaluation of \
In[634]:=",ExpressionUUID->"03f152b6-638a-4d0e-a505-6287a3d2a777"],

Cell[BoxData[
 TemplateBox[{
  "Infinity", "indet", 
   "\"Indeterminate expression \\!\\(\\*RowBox[{\\\"0\\\", \\\" \\\", \
\\\"ComplexInfinity\\\"}]\\) encountered.\"", 2, 639, 386, 
   32769373366592488388, "Local"},
  "MessageTemplate"]], "Message", "MSG",
 CellChangeTimes->{
  3.887965031737943*^9, 3.8879652123189173`*^9, 3.887965417000168*^9, 
   3.887965728905177*^9, 3.8879659161735907`*^9, 3.887966115180301*^9, 
   3.8879661891299257`*^9, 3.8879664148931675`*^9, 3.8879665022605705`*^9, 
   3.8879666625737953`*^9, 3.8879669317615466`*^9, 3.8879670210833592`*^9, 
   3.8879673786443424`*^9, 3.887967488328502*^9, 3.8879675849834905`*^9, 
   3.8879676488273253`*^9, 3.8879677466846066`*^9, 3.8879678553672285`*^9, 
   3.8879683494231215`*^9, 3.887968628593502*^9, 3.887968730432227*^9, 
   3.8879688623894515`*^9, 3.8879689739305115`*^9, 3.8879690574214363`*^9, 
   3.8879695226138687`*^9, 3.8879698308382177`*^9, 3.8879700964935255`*^9, 
   3.887970292364027*^9, 3.8879704217738533`*^9, 3.887970572138345*^9, 
   3.8879706547331147`*^9, 3.887971017101164*^9, 3.887971119970167*^9, 
   3.8879712337596645`*^9, {3.887972100059926*^9, 3.8879721132818823`*^9}, 
   3.88797249858819*^9},
 CellLabel->
  "During evaluation of \
In[634]:=",ExpressionUUID->"98a1741f-a9a2-4d92-a920-1dd2b1ef89a3"],

Cell[BoxData[
 TemplateBox[{
  "Infinity", "indet", 
   "\"Indeterminate expression \\!\\(\\*RowBox[{\\\"0\\\", \\\" \\\", \
\\\"ComplexInfinity\\\"}]\\) encountered.\"", 2, 639, 387, 
   32769373366592488388, "Local"},
  "MessageTemplate"]], "Message", "MSG",
 CellChangeTimes->{
  3.887965031737943*^9, 3.8879652123189173`*^9, 3.887965417000168*^9, 
   3.887965728905177*^9, 3.8879659161735907`*^9, 3.887966115180301*^9, 
   3.8879661891299257`*^9, 3.8879664148931675`*^9, 3.8879665022605705`*^9, 
   3.8879666625737953`*^9, 3.8879669317615466`*^9, 3.8879670210833592`*^9, 
   3.8879673786443424`*^9, 3.887967488328502*^9, 3.8879675849834905`*^9, 
   3.8879676488273253`*^9, 3.8879677466846066`*^9, 3.8879678553672285`*^9, 
   3.8879683494231215`*^9, 3.887968628593502*^9, 3.887968730432227*^9, 
   3.8879688623894515`*^9, 3.8879689739305115`*^9, 3.8879690574214363`*^9, 
   3.8879695226138687`*^9, 3.8879698308382177`*^9, 3.8879700964935255`*^9, 
   3.887970292364027*^9, 3.8879704217738533`*^9, 3.887970572138345*^9, 
   3.8879706547331147`*^9, 3.887971017101164*^9, 3.887971119970167*^9, 
   3.8879712337596645`*^9, {3.887972100059926*^9, 3.8879721132818823`*^9}, 
   3.887972498626789*^9},
 CellLabel->
  "During evaluation of \
In[634]:=",ExpressionUUID->"f32f2f87-387c-494d-96a5-9a96de3e0682"],

Cell[BoxData[
 TemplateBox[{
  "General", "stop", 
   "\"Further output of \\!\\(\\*StyleBox[RowBox[{\\\"Infinity\\\", \
\\\"::\\\", \\\"indet\\\"}], \\\"MessageName\\\"]\\) will be suppressed \
during this calculation.\"", 2, 639, 388, 32769373366592488388, "Local"},
  "MessageTemplate"]], "Message", "MSG",
 CellChangeTimes->{
  3.887965031737943*^9, 3.8879652123189173`*^9, 3.887965417000168*^9, 
   3.887965728905177*^9, 3.8879659161735907`*^9, 3.887966115180301*^9, 
   3.8879661891299257`*^9, 3.8879664148931675`*^9, 3.8879665022605705`*^9, 
   3.8879666625737953`*^9, 3.8879669317615466`*^9, 3.8879670210833592`*^9, 
   3.8879673786443424`*^9, 3.887967488328502*^9, 3.8879675849834905`*^9, 
   3.8879676488273253`*^9, 3.8879677466846066`*^9, 3.8879678553672285`*^9, 
   3.8879683494231215`*^9, 3.887968628593502*^9, 3.887968730432227*^9, 
   3.8879688623894515`*^9, 3.8879689739305115`*^9, 3.8879690574214363`*^9, 
   3.8879695226138687`*^9, 3.8879698308382177`*^9, 3.8879700964935255`*^9, 
   3.887970292364027*^9, 3.8879704217738533`*^9, 3.887970572138345*^9, 
   3.8879706547331147`*^9, 3.887971017101164*^9, 3.887971119970167*^9, 
   3.8879712337596645`*^9, {3.887972100059926*^9, 3.8879721132818823`*^9}, 
   3.8879724986362877`*^9},
 CellLabel->
  "During evaluation of \
In[634]:=",ExpressionUUID->"dfbd259a-b131-4721-a033-99d9393907f3"],

Cell[BoxData[
 TemplateBox[{
  "FindRoot", "cvmit", 
   "\"Failed to converge to the requested accuracy or precision within \\!\\(\
\\*RowBox[{\\\"100\\\"}]\\) iterations.\"", 2, 639, 389, 32769373366592488388,
    "Local"},
  "MessageTemplate"]], "Message", "MSG",
 CellChangeTimes->{
  3.887965031737943*^9, 3.8879652123189173`*^9, 3.887965417000168*^9, 
   3.887965728905177*^9, 3.8879659161735907`*^9, 3.887966115180301*^9, 
   3.8879661891299257`*^9, 3.8879664148931675`*^9, 3.8879665022605705`*^9, 
   3.8879666625737953`*^9, 3.8879669317615466`*^9, 3.8879670210833592`*^9, 
   3.8879673786443424`*^9, 3.887967488328502*^9, 3.8879675849834905`*^9, 
   3.8879676488273253`*^9, 3.8879677466846066`*^9, 3.8879678553672285`*^9, 
   3.8879683494231215`*^9, 3.887968628593502*^9, 3.887968730432227*^9, 
   3.8879688623894515`*^9, 3.8879689739305115`*^9, 3.8879690574214363`*^9, 
   3.8879695226138687`*^9, 3.8879698308382177`*^9, 3.8879700964935255`*^9, 
   3.887970292364027*^9, 3.8879704217738533`*^9, 3.887970572138345*^9, 
   3.8879706547331147`*^9, 3.887971017101164*^9, 3.887971119970167*^9, 
   3.8879712337596645`*^9, {3.887972100059926*^9, 3.8879721132818823`*^9}, 
   3.88797250332812*^9},
 CellLabel->
  "During evaluation of \
In[634]:=",ExpressionUUID->"2df3cd3f-f5e3-4bca-bdaa-6249d180f48a"],

Cell[BoxData[
 RowBox[{"{", 
  RowBox[{
   RowBox[{"b", "\[Rule]", "0.72408207402256356359041925922306561522`12."}], 
   ",", 
   RowBox[{
   "Wi", "\[Rule]", "8.09885774002690577649193275849231643428`12."}]}], 
  "}"}]], "Output",
 CellChangeTimes->CompressedData["
1:eJxTTMoPSmVkYGDQB+IWgc59m7+/cdzBOvcUiN7Q0HEHRMudOvoURHtI7voO
ogN79vJuAdLfDqcqgugfBct1QPRNDmUPEB3i8CgNRCtNZssF0Te0pjeD6N0S
enNBtKq57hGwePy02yB69jHpryB6Gk/0PxBtcbpKaiuQ7osoVgXRWlEPLEC0
T11bFIi+c2tDKoiuEOKYDKIndEstANE/J+iuAdEh8zW2gOiU81UHQPSD/h9n
QfSvvf4824C01HEbfRAdYxVrDaJ5Vt/zBtFT7p+MBNFalpdTQPQ9pYR5ILqi
69kREJ1svvwZiHYqnf4PRGdwB/JvB9Irl09QBNEnQh9rg+hbDfqRILqigDsN
RCuKXiwB0RLyOx+C6MM/VZ6D6Gupr4V2AGkA+87jqg==
  "],
 CellLabel->
  "Out[639]=",ExpressionUUID->"e8677d89-81e2-4329-8c1a-2239882c81d1"]
}, Open  ]],

Cell[CellGroupData[{

Cell[BoxData[{
 RowBox[{"series", "=", "16"}], "\[IndentingNewLine]", 
 RowBox[{"b", "=", 
  RowBox[{
   RowBox[{"bval2", "[", 
    RowBox[{"[", "1", "]"}], "]"}], "[", 
   RowBox[{"[", "2", "]"}], "]"}]}], "\[IndentingNewLine]", 
 RowBox[{"Wi", "=", 
  RowBox[{
   RowBox[{"bval2", "[", 
    RowBox[{"[", "2", "]"}], "]"}], "[", 
   RowBox[{"[", "2", "]"}], "]"}]}], "\[IndentingNewLine]", 
 RowBox[{
  RowBox[{
   RowBox[{"f", "[", 
    RowBox[{"m_", ",", "k_", ",", "r_"}], "]"}], ":=", 
   RowBox[{"If", "[", 
    RowBox[{
     RowBox[{
      RowBox[{"m", "<=", "k"}], " ", "&&", " ", 
      RowBox[{"m", ">=", "k"}]}], ",", 
     RowBox[{
      RowBox[{"Log", "[", "r", "]"}], "-", 
      RowBox[{"Log", "[", 
       RowBox[{"a", "*", "RR"}], "]"}]}], ",", 
     FractionBox[
      RowBox[{
       SuperscriptBox["r", 
        RowBox[{"2", "*", 
         RowBox[{"(", 
          RowBox[{"m", "-", "k"}], ")"}]}]], "-", 
       SuperscriptBox[
        RowBox[{"(", 
         RowBox[{"a", "*", "RR"}], ")"}], 
        RowBox[{"2", "*", 
         RowBox[{"(", 
          RowBox[{"m", "-", "k"}], ")"}]}]]}], 
      RowBox[{"2", "*", 
       RowBox[{"(", 
        RowBox[{"m", "-", "k"}], ")"}]}]]}], "]"}]}], 
  ";"}], "\[IndentingNewLine]", 
 RowBox[{
  RowBox[{
   RowBox[{"uvel2", "[", "r_", "]"}], ":=", 
   RowBox[{
    RowBox[{"(", 
     FractionBox[
      RowBox[{"Gamma", "[", "\[Beta]", "]"}], "2"], ")"}], "*", 
    RowBox[{"Sum", "[", 
     RowBox[{
      RowBox[{
       FractionBox[
        SuperscriptBox[
         RowBox[{"(", 
          FractionBox[
           RowBox[{"\[CurlyEpsilon]", "*", 
            SuperscriptBox["Wi", "2"]}], "2"], ")"}], "k"], 
        RowBox[{"Gamma", "[", 
         RowBox[{
          RowBox[{"\[Alpha]", "*", "k"}], "+", "\[Beta]"}], "]"}]], "*", 
       RowBox[{"(", 
        RowBox[{"Sum", "[", 
         RowBox[{
          RowBox[{
           RowBox[{"Binomial", "[", 
            RowBox[{
             RowBox[{
              RowBox[{"2", "*", "k"}], "+", "1"}], ",", "m"}], "]"}], "*", 
           SuperscriptBox[
            RowBox[{"(", 
             RowBox[{"-", "1"}], ")"}], "m"], "*", 
           SuperscriptBox[
            RowBox[{"(", 
             FractionBox[
              RowBox[{
               SuperscriptBox["b", "2"], "*", 
               SuperscriptBox["RR", "2"]}], "1"], ")"}], 
            RowBox[{
             RowBox[{"2", "*", "k"}], "+", "1", "-", "m"}]], "*", 
           RowBox[{"f", "[", 
            RowBox[{"m", ",", "k", ",", "r"}], "]"}]}], ",", 
          RowBox[{"{", 
           RowBox[{"m", ",", "0", ",", 
            RowBox[{
             RowBox[{"2", "*", "k"}], "+", "1"}]}], "}"}]}], "]"}], ")"}]}], 
      ",", 
      RowBox[{"{", 
       RowBox[{"k", ",", "0", ",", "series"}], "}"}]}], "]"}]}]}], 
  ";"}], "\[IndentingNewLine]", 
 RowBox[{
  RowBox[{"Do", "[", 
   RowBox[{
    RowBox[{"Print", "[", 
     RowBox[{"uvel2", "[", "i", "]"}], "]"}], ",", 
    RowBox[{"{", 
     RowBox[{"i", ",", "1", ",", "2", ",", "0.01"}], "}"}]}], "]"}], 
  ";"}], "\[IndentingNewLine]", 
 RowBox[{"Table", "[", 
  RowBox[{
   RowBox[{"{", 
    RowBox[{"i", ",", 
     RowBox[{"uvel2", "[", "i", "]"}]}], "}"}], ",", 
   RowBox[{"{", 
    RowBox[{"i", ",", "1", ",", "2", ",", "0.01"}], "}"}]}], 
  "]"}], "\[IndentingNewLine]", 
 RowBox[{"ListPlot", "[", 
  RowBox[{"%", ",", 
   RowBox[{"Joined", "\[Rule]", "True"}]}], "]"}]}], "Input",
 CellChangeTimes->{{3.8868423016797113`*^9, 3.886842304573986*^9}, {
   3.8870894471670303`*^9, 3.8870894477811656`*^9}, {3.887089963482184*^9, 
   3.88708996360398*^9}, {3.887090343166353*^9, 3.887090343267706*^9}, {
   3.8870908832464447`*^9, 3.8870908837465477`*^9}, {3.887091467818673*^9, 
   3.8870914679376845`*^9}, {3.887091531577854*^9, 3.887091532652426*^9}, {
   3.887091588349758*^9, 3.887091588715391*^9}, {3.8870924963155794`*^9, 
   3.887092496419671*^9}, {3.887092986912196*^9, 3.8870929869675035`*^9}, {
   3.8870972873419857`*^9, 3.8870972874114733`*^9}, {3.887097332695795*^9, 
   3.8870973329733615`*^9}, {3.887097388319816*^9, 3.887097388847616*^9}, {
   3.887097514832789*^9, 3.8870975156870637`*^9}, 3.887098168983453*^9, {
   3.8870984060952353`*^9, 3.8870984062521257`*^9}, {3.8870984669917507`*^9, 
   3.887098468438877*^9}, {3.887098509775699*^9, 3.887098510318863*^9}, {
   3.887100503107911*^9, 3.887100503221417*^9}, {3.8871006246556034`*^9, 
   3.8871006253297*^9}, {3.887100681838664*^9, 3.887100682742757*^9}, {
   3.887100725944721*^9, 3.887100726828836*^9}, {3.887193349848932*^9, 
   3.887193360509281*^9}, {3.887260069644432*^9, 3.887260083075749*^9}, {
   3.8872603003869443`*^9, 3.887260324381485*^9}, {3.887260362507544*^9, 
   3.887260363242653*^9}, {3.887260393468419*^9, 3.8872603939713974`*^9}, {
   3.8872605343157034`*^9, 3.887260535848107*^9}, {3.887261018993864*^9, 
   3.887261019678911*^9}, {3.8872622128864155`*^9, 3.8872622381877556`*^9}, {
   3.8872625008828773`*^9, 3.8872625013982663`*^9}, {3.887262590755169*^9, 
   3.8872625912338715`*^9}, {3.887272563624565*^9, 3.8872726167992716`*^9}, {
   3.8872726569198914`*^9, 3.887272666667796*^9}, {3.8872728495677705`*^9, 
   3.8872728505806704`*^9}, {3.887275380319454*^9, 3.887275380973737*^9}, {
   3.887276525248603*^9, 3.8872765264264174`*^9}, {3.887276744689005*^9, 
   3.8872767453504844`*^9}, {3.887277388430969*^9, 3.887277408337207*^9}, {
   3.887277442889879*^9, 3.887277443647458*^9}, {3.8872776560733213`*^9, 
   3.8872776642547646`*^9}, 3.8873620382628655`*^9, {3.887362173137065*^9, 
   3.8873621888430977`*^9}, {3.887366875859514*^9, 3.887366891095714*^9}, {
   3.887367180971374*^9, 3.887367185794526*^9}, {3.8873672566484394`*^9, 
   3.887367267779301*^9}, {3.8873691782431436`*^9, 3.8873691939765396`*^9}, {
   3.8874436342530336`*^9, 3.8874436830543776`*^9}, {3.8874507048281507`*^9, 
   3.887450733862314*^9}, {3.8874508829685864`*^9, 3.887450883749759*^9}, {
   3.887706521295884*^9, 3.887706526095513*^9}, {3.887884835370841*^9, 
   3.88788486350877*^9}, {3.8878850699774904`*^9, 3.887885092772414*^9}, {
   3.8879488685686183`*^9, 3.887948869767827*^9}},
 CellLabel->
  "In[640]:=",ExpressionUUID->"3f8ed157-3ff1-4aac-b88c-0a3cf128e740"],

Cell[BoxData["16"], "Output",
 CellChangeTimes->{3.887964797363864*^9, 3.8879659440434093`*^9, 
  3.8879665527981977`*^9, 3.887966955309982*^9, 3.8879670501236753`*^9, 
  3.8879674108079777`*^9, 3.8879676778836823`*^9, 3.887967790312127*^9, 
  3.887968547286273*^9, 3.887968663087159*^9, 3.887968803324152*^9, 
  3.887968903878867*^9, 3.8879689973725615`*^9, 3.887969460748516*^9, 
  3.887969770353671*^9, 3.8879702257294025`*^9, 3.8879703513973036`*^9, 
  3.8879704589491725`*^9, 3.8879709340112624`*^9, 3.8879710554506817`*^9, 
  3.887971146533717*^9, 3.8879718441814237`*^9, 3.8879721636919413`*^9, 
  3.8879729852425275`*^9},
 CellLabel->
  "Out[640]=",ExpressionUUID->"874f6b16-d18c-4ab9-b63f-5edf3de438cf"],

Cell[BoxData["0.72408207402256356359041925922306561522`12."], "Output",
 CellChangeTimes->{3.887964797363864*^9, 3.8879659440434093`*^9, 
  3.8879665527981977`*^9, 3.887966955309982*^9, 3.8879670501236753`*^9, 
  3.8879674108079777`*^9, 3.8879676778836823`*^9, 3.887967790312127*^9, 
  3.887968547286273*^9, 3.887968663087159*^9, 3.887968803324152*^9, 
  3.887968903878867*^9, 3.8879689973725615`*^9, 3.887969460748516*^9, 
  3.887969770353671*^9, 3.8879702257294025`*^9, 3.8879703513973036`*^9, 
  3.8879704589491725`*^9, 3.8879709340112624`*^9, 3.8879710554506817`*^9, 
  3.887971146533717*^9, 3.8879718441814237`*^9, 3.8879721636919413`*^9, 
  3.887972985245519*^9},
 CellLabel->
  "Out[641]=",ExpressionUUID->"2ae9dde5-2de1-4afe-aac5-7c31487b4a50"],

Cell[BoxData["8.09885774002690577649193275849231643428`12."], "Output",
 CellChangeTimes->{3.887964797363864*^9, 3.8879659440434093`*^9, 
  3.8879665527981977`*^9, 3.887966955309982*^9, 3.8879670501236753`*^9, 
  3.8879674108079777`*^9, 3.8879676778836823`*^9, 3.887967790312127*^9, 
  3.887968547286273*^9, 3.887968663087159*^9, 3.887968803324152*^9, 
  3.887968903878867*^9, 3.8879689973725615`*^9, 3.887969460748516*^9, 
  3.887969770353671*^9, 3.8879702257294025`*^9, 3.8879703513973036`*^9, 
  3.8879704589491725`*^9, 3.8879709340112624`*^9, 3.8879710554506817`*^9, 
  3.887971146533717*^9, 3.8879718441814237`*^9, 3.8879721636919413`*^9, 
  3.887972985249508*^9},
 CellLabel->
  "Out[642]=",ExpressionUUID->"0a5e0659-422f-4798-84cf-c37524a1af82"],

Cell[CellGroupData[{

Cell[BoxData["0.`"], "Print",
 CellChangeTimes->{3.8879729852525005`*^9},
 CellLabel->
  "During evaluation of \
In[640]:=",ExpressionUUID->"a1b8d375-fa25-4d04-b01f-4cd1550a7f96"],

Cell[BoxData["0.07793570374249867`"], "Print",
 CellChangeTimes->{3.8879729852554913`*^9},
 CellLabel->
  "During evaluation of \
In[640]:=",ExpressionUUID->"020d7269-25e7-4aef-9498-bbc69e502e97"],

Cell[BoxData["0.14137272030540166`"], "Print",
 CellChangeTimes->{3.8879729852635193`*^9},
 CellLabel->
  "During evaluation of \
In[640]:=",ExpressionUUID->"ba04316a-4870-48e5-b063-75bcbb9e3f39"],

Cell[BoxData["0.19351360697141676`"], "Print",
 CellChangeTimes->{3.887972985265498*^9},
 CellLabel->
  "During evaluation of \
In[640]:=",ExpressionUUID->"fb22b16c-f739-49de-81de-742712f70d20"],

Cell[BoxData["0.2367642249716603`"], "Print",
 CellChangeTimes->{3.887972985267493*^9},
 CellLabel->
  "During evaluation of \
In[640]:=",ExpressionUUID->"4471f95e-df0c-4906-8996-777d084e74a4"],

Cell[BoxData["0.27294931510272913`"], "Print",
 CellChangeTimes->{3.887972985270482*^9},
 CellLabel->
  "During evaluation of \
In[640]:=",ExpressionUUID->"0c222de5-7044-481c-8f54-1089052a78e8"],

Cell[BoxData["0.3034685647490397`"], "Print",
 CellChangeTimes->{3.8879729852724805`*^9},
 CellLabel->
  "During evaluation of \
In[640]:=",ExpressionUUID->"b801a257-5c02-43a0-86b8-47008365e12d"],

Cell[BoxData["0.32940389722514807`"], "Print",
 CellChangeTimes->{3.8879729852754745`*^9},
 CellLabel->
  "During evaluation of \
In[640]:=",ExpressionUUID->"2cae4cd6-37ea-4323-9046-4fc5a0db5540"],

Cell[BoxData["0.351600243238891`"], "Print",
 CellChangeTimes->{3.8879729852784724`*^9},
 CellLabel->
  "During evaluation of \
In[640]:=",ExpressionUUID->"57894bdc-cde2-44ed-9c8e-195ce25704a7"],

Cell[BoxData["0.37072227271606556`"], "Print",
 CellChangeTimes->{3.8879729852804546`*^9},
 CellLabel->
  "During evaluation of \
In[640]:=",ExpressionUUID->"ca2424ba-2625-41cd-ad56-956e82847840"],

Cell[BoxData["0.38729733270816`"], "Print",
 CellChangeTimes->{3.887972985283487*^9},
 CellLabel->
  "During evaluation of \
In[640]:=",ExpressionUUID->"6f4f406c-3504-43a3-b859-6dcfdaa95c38"],

Cell[BoxData["0.40174785503513555`"], "Print",
 CellChangeTimes->{3.8879729852854753`*^9},
 CellLabel->
  "During evaluation of \
In[640]:=",ExpressionUUID->"e55b49b0-57ac-4446-bfc0-b1e98bf4eb9a"],

Cell[BoxData["0.41441309545376026`"], "Print",
 CellChangeTimes->{3.8879729852884645`*^9},
 CellLabel->
  "During evaluation of \
In[640]:=",ExpressionUUID->"bc9cf8c5-4493-4ee1-b609-2e4fb459c3fe"],

Cell[BoxData["0.42556903151101255`"], "Print",
 CellChangeTimes->{3.8879729852914615`*^9},
 CellLabel->
  "During evaluation of \
In[640]:=",ExpressionUUID->"65b37eb7-9826-4786-8926-2d942dbdf197"],

Cell[BoxData["0.4354398814525062`"], "Print",
 CellChangeTimes->{3.887972985293455*^9},
 CellLabel->
  "During evaluation of \
In[640]:=",ExpressionUUID->"f4257b9b-3a58-400e-936d-ebf257f480f9"],

Cell[BoxData["0.44421140075682386`"], "Print",
 CellChangeTimes->{3.887972985295987*^9},
 CellLabel->
  "During evaluation of \
In[640]:=",ExpressionUUID->"2d983513-586b-4503-b220-7b1cf0b71b9b"],

Cell[BoxData["0.4520355233665733`"], "Print",
 CellChangeTimes->{3.887972985298011*^9},
 CellLabel->
  "During evaluation of \
In[640]:=",ExpressionUUID->"da92b817-548b-490d-b9ab-7ac3cd861a8e"],

Cell[BoxData["0.4590392739061662`"], "Print",
 CellChangeTimes->{3.8879729853010087`*^9},
 CellLabel->
  "During evaluation of \
In[640]:=",ExpressionUUID->"63fc64f6-5f9b-4128-9630-d2eca16fcadf"],

Cell[BoxData["0.4653292131681577`"], "Print",
 CellChangeTimes->{3.8879729853030043`*^9},
 CellLabel->
  "During evaluation of \
In[640]:=",ExpressionUUID->"9c3acd14-a67e-4abb-978b-78171871809b"],

Cell[BoxData["0.47099395344755735`"], "Print",
 CellChangeTimes->{3.887972985305997*^9},
 CellLabel->
  "During evaluation of \
In[640]:=",ExpressionUUID->"91e6b275-7083-4f17-8109-b7e2421d0219"],

Cell[BoxData["0.4761085734105391`"], "Print",
 CellChangeTimes->{3.8879729853079906`*^9},
 CellLabel->
  "During evaluation of \
In[640]:=",ExpressionUUID->"0a7bdf16-4974-4e0d-adbb-a18737841e59"],

Cell[BoxData["0.4807371977573276`"], "Print",
 CellChangeTimes->{3.8879729853109827`*^9},
 CellLabel->
  "During evaluation of \
In[640]:=",ExpressionUUID->"e1f0b68a-daa7-4804-ab03-1cd3272ce995"],

Cell[BoxData["0.48493359524612434`"], "Print",
 CellChangeTimes->{3.8879729853139677`*^9},
 CellLabel->
  "During evaluation of \
In[640]:=",ExpressionUUID->"f5489c5d-f5c3-4840-9494-2ffaf0ed8bbf"],

Cell[BoxData["0.4887443137403557`"], "Print",
 CellChangeTimes->{3.8879729853159695`*^9},
 CellLabel->
  "During evaluation of \
In[640]:=",ExpressionUUID->"97b414ad-1df2-423b-8c93-7a4350fbb615"],

Cell[BoxData["0.4922094790709775`"], "Print",
 CellChangeTimes->{3.887972985318928*^9},
 CellLabel->
  "During evaluation of \
In[640]:=",ExpressionUUID->"1646d96b-7df6-47ec-8344-29eb023d48d2"],

Cell[BoxData["0.49536247733148975`"], "Print",
 CellChangeTimes->{3.8879729853209224`*^9},
 CellLabel->
  "During evaluation of \
In[640]:=",ExpressionUUID->"ee7fb232-d9e4-4772-941f-ff1e9aa160af"],

Cell[BoxData["0.4982335962076467`"], "Print",
 CellChangeTimes->{3.8879729853239145`*^9},
 CellLabel->
  "During evaluation of \
In[640]:=",ExpressionUUID->"e8587c82-5b7a-47a4-9ff4-edc92f697870"],

Cell[BoxData["0.5008482257986898`"], "Print",
 CellChangeTimes->{3.8879729853259473`*^9},
 CellLabel->
  "During evaluation of \
In[640]:=",ExpressionUUID->"aef12b54-5c33-4617-8e9a-abe4de33a7af"],

Cell[BoxData["0.503228897026337`"], "Print",
 CellChangeTimes->{3.8879729853289347`*^9},
 CellLabel->
  "During evaluation of \
In[640]:=",ExpressionUUID->"1849403d-bd0b-4144-8e24-12ee3d051353"],

Cell[BoxData["0.5053939914825061`"], "Print",
 CellChangeTimes->{3.8879729853309326`*^9},
 CellLabel->
  "During evaluation of \
In[640]:=",ExpressionUUID->"a91f1f01-667f-4ce5-98d1-9acd6db990a7"],

Cell[BoxData["0.5073614910267293`"], "Print",
 CellChangeTimes->{3.887972985332922*^9},
 CellLabel->
  "During evaluation of \
In[640]:=",ExpressionUUID->"ab1ff617-6a23-42d2-bbf7-1c1ae86bc4a8"],

Cell[BoxData["0.5091453628113626`"], "Print",
 CellChangeTimes->{3.8879729853359165`*^9},
 CellLabel->
  "During evaluation of \
In[640]:=",ExpressionUUID->"bbfca272-869c-4793-baae-355d3cc09912"],

Cell[BoxData["0.5107592603850535`"], "Print",
 CellChangeTimes->{3.887972985338911*^9},
 CellLabel->
  "During evaluation of \
In[640]:=",ExpressionUUID->"8142b309-1f84-4b7b-a0e3-0ba9d5831be5"],

Cell[BoxData["0.512213448988604`"], "Print",
 CellChangeTimes->{3.887972985340871*^9},
 CellLabel->
  "During evaluation of \
In[640]:=",ExpressionUUID->"b147326c-0db2-436f-ae5e-487df955173b"],

Cell[BoxData["0.5135183833192487`"], "Print",
 CellChangeTimes->{3.887972985343896*^9},
 CellLabel->
  "During evaluation of \
In[640]:=",ExpressionUUID->"362895c6-eb80-4ac6-806f-e10e77094e60"],

Cell[BoxData["0.5146821876243377`"], "Print",
 CellChangeTimes->{3.8879729853458953`*^9},
 CellLabel->
  "During evaluation of \
In[640]:=",ExpressionUUID->"db5959b9-c740-4795-9a1b-309562126e76"],

Cell[BoxData["0.5157129125978023`"], "Print",
 CellChangeTimes->{3.887972985347883*^9},
 CellLabel->
  "During evaluation of \
In[640]:=",ExpressionUUID->"6ab1100c-fcf5-4821-96d8-8e9ee0745ff7"],

Cell[BoxData["0.5166165934715696`"], "Print",
 CellChangeTimes->{3.887972985353835*^9},
 CellLabel->
  "During evaluation of \
In[640]:=",ExpressionUUID->"8565da5a-d08c-4d49-99e9-81a629ac9cc6"],

Cell[BoxData["0.5173989490128627`"], "Print",
 CellChangeTimes->{3.8879729853558297`*^9},
 CellLabel->
  "During evaluation of \
In[640]:=",ExpressionUUID->"b409996d-6b69-4f55-b276-1137b14b17b4"],

Cell[BoxData["0.5180646746908592`"], "Print",
 CellChangeTimes->{3.887972985358822*^9},
 CellLabel->
  "During evaluation of \
In[640]:=",ExpressionUUID->"70722b36-4a34-4e8d-b285-b2309db3228b"],

Cell[BoxData["0.5186181959535447`"], "Print",
 CellChangeTimes->{3.887972985361814*^9},
 CellLabel->
  "During evaluation of \
In[640]:=",ExpressionUUID->"4762701b-e439-4e26-b6a4-fba87916d84c"],

Cell[BoxData["0.5190624710006198`"], "Print",
 CellChangeTimes->{3.8879729853638244`*^9},
 CellLabel->
  "During evaluation of \
In[640]:=",ExpressionUUID->"ca3f7e86-d70b-4b92-98d0-f2dd74b9bf85"],

Cell[BoxData["0.5194007965767551`"], "Print",
 CellChangeTimes->{3.887972985367798*^9},
 CellLabel->
  "During evaluation of \
In[640]:=",ExpressionUUID->"89b59d0c-5de4-4bd8-8955-8ff53b165ccb"],

Cell[BoxData["0.5196354743657882`"], "Print",
 CellChangeTimes->{3.887972985370816*^9},
 CellLabel->
  "During evaluation of \
In[640]:=",ExpressionUUID->"dff4debc-ddad-4dd5-bbda-1d81c95ef678"],

Cell[BoxData["0.5197679686892898`"], "Print",
 CellChangeTimes->{3.8879729853728237`*^9},
 CellLabel->
  "During evaluation of \
In[640]:=",ExpressionUUID->"0880e3e9-97af-42b0-9669-a888576ab902"],

Cell[BoxData["0.5197994554569664`"], "Print",
 CellChangeTimes->{3.8879729853758183`*^9},
 CellLabel->
  "During evaluation of \
In[640]:=",ExpressionUUID->"a0080de4-9158-4229-983a-341d43f67e2b"],

Cell[BoxData["0.5197313931909623`"], "Print",
 CellChangeTimes->{3.887972985377825*^9},
 CellLabel->
  "During evaluation of \
In[640]:=",ExpressionUUID->"2d7e86a0-279c-4650-8cb3-fe068be4d355"],

Cell[BoxData["0.5195633167305426`"], "Print",
 CellChangeTimes->{3.8879729853808007`*^9},
 CellLabel->
  "During evaluation of \
In[640]:=",ExpressionUUID->"fc27511f-84fb-4979-8ffe-aec9eb076e3a"],

Cell[BoxData["0.5192963303787491`"], "Print",
 CellChangeTimes->{3.887972985382825*^9},
 CellLabel->
  "During evaluation of \
In[640]:=",ExpressionUUID->"b48b9ad1-82dd-4181-92f4-134715831b7c"],

Cell[BoxData["0.5189291160832666`"], "Print",
 CellChangeTimes->{3.8879729853858232`*^9},
 CellLabel->
  "During evaluation of \
In[640]:=",ExpressionUUID->"9b411cbc-90fa-4998-bd8f-290083b4894d"],

Cell[BoxData["0.5184608989190417`"], "Print",
 CellChangeTimes->{3.887972985387819*^9},
 CellLabel->
  "During evaluation of \
In[640]:=",ExpressionUUID->"e56effc5-725a-429d-8146-f65e73d23ea8"],

Cell[BoxData["0.5178906305489275`"], "Print",
 CellChangeTimes->{3.887972985390778*^9},
 CellLabel->
  "During evaluation of \
In[640]:=",ExpressionUUID->"fc86d2db-fbb1-4f1a-95e6-b5d747ed146d"],

Cell[BoxData["0.5172164766933658`"], "Print",
 CellChangeTimes->{3.887972985392806*^9},
 CellLabel->
  "During evaluation of \
In[640]:=",ExpressionUUID->"b421424b-c8c0-42e1-96b2-20cb73728551"],

Cell[BoxData["0.5164370703494633`"], "Print",
 CellChangeTimes->{3.8879729853948*^9},
 CellLabel->
  "During evaluation of \
In[640]:=",ExpressionUUID->"8594068a-727c-477d-8ebc-294aa47006dc"],

Cell[BoxData["0.5155485570978126`"], "Print",
 CellChangeTimes->{3.8879729853983684`*^9},
 CellLabel->
  "During evaluation of \
In[640]:=",ExpressionUUID->"7485be35-030a-4039-8944-cada45383d68"],

Cell[BoxData["0.5145491125432987`"], "Print",
 CellChangeTimes->{3.8879729854003644`*^9},
 CellLabel->
  "During evaluation of \
In[640]:=",ExpressionUUID->"e0ea9843-97d6-4d8a-b6d3-9118a6020902"],

Cell[BoxData["0.5134349803453528`"], "Print",
 CellChangeTimes->{3.887972985402363*^9},
 CellLabel->
  "During evaluation of \
In[640]:=",ExpressionUUID->"a53972f2-5b27-4b64-b0d3-3f73d9d82716"],

Cell[BoxData["0.5122025991290596`"], "Print",
 CellChangeTimes->{3.8879729854053555`*^9},
 CellLabel->
  "During evaluation of \
In[640]:=",ExpressionUUID->"39e5370b-cc59-4c09-ba10-41aa2feb5874"],

Cell[BoxData["0.5108469780333583`"], "Print",
 CellChangeTimes->{3.8879729854073153`*^9},
 CellLabel->
  "During evaluation of \
In[640]:=",ExpressionUUID->"dbd60b4b-3bcd-4b40-98aa-2b90d6f9e216"],

Cell[BoxData["0.5093643267516136`"], "Print",
 CellChangeTimes->{3.887972985410339*^9},
 CellLabel->
  "During evaluation of \
In[640]:=",ExpressionUUID->"ac0d97f8-a721-483a-adeb-b7b932c15a03"],

Cell[BoxData["0.5077483340786059`"], "Print",
 CellChangeTimes->{3.8879729854123397`*^9},
 CellLabel->
  "During evaluation of \
In[640]:=",ExpressionUUID->"de837232-13db-4be8-b6be-5f32bcaf16de"],

Cell[BoxData["0.5059937798178127`"], "Print",
 CellChangeTimes->{3.887972985415337*^9},
 CellLabel->
  "During evaluation of \
In[640]:=",ExpressionUUID->"7f51396d-7754-444e-a2a6-0e8069078b6f"],

Cell[BoxData["0.504093038805052`"], "Print",
 CellChangeTimes->{3.8879729854173193`*^9},
 CellLabel->
  "During evaluation of \
In[640]:=",ExpressionUUID->"33c16395-9179-4071-b567-f4012e41e6c4"],

Cell[BoxData["0.5020403346808672`"], "Print",
 CellChangeTimes->{3.887972985420313*^9},
 CellLabel->
  "During evaluation of \
In[640]:=",ExpressionUUID->"f4d305a4-29a6-43fc-8225-ea686cf99ff2"],

Cell[BoxData["0.49982704963301205`"], "Print",
 CellChangeTimes->{3.8879729854223137`*^9},
 CellLabel->
  "During evaluation of \
In[640]:=",ExpressionUUID->"912f5e61-a356-47b3-911a-47d9580e856b"],

Cell[BoxData["0.4974445318405328`"], "Print",
 CellChangeTimes->{3.887972985424269*^9},
 CellLabel->
  "During evaluation of \
In[640]:=",ExpressionUUID->"d0ee788c-79e1-4e08-92e7-b7f731172413"],

Cell[BoxData["0.494883079933159`"], "Print",
 CellChangeTimes->{3.887972985427296*^9},
 CellLabel->
  "During evaluation of \
In[640]:=",ExpressionUUID->"70f1daed-5e8d-4f05-83fb-071cba6ac5d2"],

Cell[BoxData["0.49213250144569703`"], "Print",
 CellChangeTimes->{3.8879729854302845`*^9},
 CellLabel->
  "During evaluation of \
In[640]:=",ExpressionUUID->"54de0d84-8055-46e6-ae7e-a2029a841729"],

Cell[BoxData["0.4891816018164789`"], "Print",
 CellChangeTimes->{3.8879729854322796`*^9},
 CellLabel->
  "During evaluation of \
In[640]:=",ExpressionUUID->"6cfa34d9-ebcb-4c7b-904e-4d1ac99ebc15"],

Cell[BoxData["0.48601761833664864`"], "Print",
 CellChangeTimes->{3.8879729854342775`*^9},
 CellLabel->
  "During evaluation of \
In[640]:=",ExpressionUUID->"5300c21b-6260-482d-8066-1960ce8219d1"],

Cell[BoxData["0.48262747027047315`"], "Print",
 CellChangeTimes->{3.8879729854372673`*^9},
 CellLabel->
  "During evaluation of \
In[640]:=",ExpressionUUID->"240cb349-605d-4b0f-94a8-c560393d820b"],

Cell[BoxData["0.47899527504406725`"], "Print",
 CellChangeTimes->{3.8879729854392614`*^9},
 CellLabel->
  "During evaluation of \
In[640]:=",ExpressionUUID->"ed67f82b-3d74-4aba-815e-6876f262a1d7"],

Cell[BoxData["0.47510611196053404`"], "Print",
 CellChangeTimes->{3.887972985442256*^9},
 CellLabel->
  "During evaluation of \
In[640]:=",ExpressionUUID->"79e8beba-5794-4e15-aa6a-aad94274e72d"],

Cell[BoxData["0.4709412002324579`"], "Print",
 CellChangeTimes->{3.887972985444263*^9},
 CellLabel->
  "During evaluation of \
In[640]:=",ExpressionUUID->"e51fffc2-edab-4bb5-b958-33edfcc837aa"],

Cell[BoxData["0.46648203848558617`"], "Print",
 CellChangeTimes->{3.88797298544724*^9},
 CellLabel->
  "During evaluation of \
In[640]:=",ExpressionUUID->"ba94079b-bf39-4f53-939e-31ed2c5dc062"],

Cell[BoxData["0.46170655474856787`"], "Print",
 CellChangeTimes->{3.887972985449236*^9},
 CellLabel->
  "During evaluation of \
In[640]:=",ExpressionUUID->"b8c442c4-ec0e-465a-91f7-061f34e7d951"],

Cell[BoxData["0.45659244230901724`"], "Print",
 CellChangeTimes->{3.887972985453223*^9},
 CellLabel->
  "During evaluation of \
In[640]:=",ExpressionUUID->"783e31ce-c421-4ba0-bc15-5eb4fb1ac875"],

Cell[BoxData["0.4511135308975089`"], "Print",
 CellChangeTimes->{3.887972985457182*^9},
 CellLabel->
  "During evaluation of \
In[640]:=",ExpressionUUID->"fe8421a2-e49d-45ed-bb07-54e4608944e8"],

Cell[BoxData["0.44524156033743756`"], "Print",
 CellChangeTimes->{3.8879729854592113`*^9},
 CellLabel->
  "During evaluation of \
In[640]:=",ExpressionUUID->"8392631d-67cd-44db-8b65-c94697697984"],

Cell[BoxData["0.438946872698549`"], "Print",
 CellChangeTimes->{3.8879729854621987`*^9},
 CellLabel->
  "During evaluation of \
In[640]:=",ExpressionUUID->"5cb8993d-614d-406b-a15e-02f1d90432d7"],

Cell[BoxData["0.43219524903190754`"], "Print",
 CellChangeTimes->{3.8879729854641933`*^9},
 CellLabel->
  "During evaluation of \
In[640]:=",ExpressionUUID->"3b22c460-0213-464d-938c-8b6dcc433282"],

Cell[BoxData["0.42494966730588435`"], "Print",
 CellChangeTimes->{3.887972985466192*^9},
 CellLabel->
  "During evaluation of \
In[640]:=",ExpressionUUID->"ff76e551-20e1-4f6b-bf12-93f8574c99c9"],

Cell[BoxData["0.4171703704264162`"], "Print",
 CellChangeTimes->{3.88797298546918*^9},
 CellLabel->
  "During evaluation of \
In[640]:=",ExpressionUUID->"af3390d6-822c-46cd-8ac9-a1171c016878"],

Cell[BoxData["0.40881188091978543`"], "Print",
 CellChangeTimes->{3.887972985471176*^9},
 CellLabel->
  "During evaluation of \
In[640]:=",ExpressionUUID->"c877c211-893d-4225-a9ca-2d2732430898"],

Cell[BoxData["0.3998247798008114`"], "Print",
 CellChangeTimes->{3.8879729854741364`*^9},
 CellLabel->
  "During evaluation of \
In[640]:=",ExpressionUUID->"8107e2a9-1c21-467c-8359-bc12f646dacd"],

Cell[BoxData["0.39015576485607256`"], "Print",
 CellChangeTimes->{3.8879729854771585`*^9},
 CellLabel->
  "During evaluation of \
In[640]:=",ExpressionUUID->"664a5493-d511-4171-958d-3f54c8eae89c"],

Cell[BoxData["0.3797442894650221`"], "Print",
 CellChangeTimes->{3.887972985479103*^9},
 CellLabel->
  "During evaluation of \
In[640]:=",ExpressionUUID->"0d9c1567-ce8c-4578-bae3-64130b4635e3"],

Cell[BoxData["0.36852393574062975`"], "Print",
 CellChangeTimes->{3.88797298548237*^9},
 CellLabel->
  "During evaluation of \
In[640]:=",ExpressionUUID->"5d06161e-a9fb-4719-92e1-dccafe92ce19"],

Cell[BoxData["0.35642262327865337`"], "Print",
 CellChangeTimes->{3.887972985484661*^9},
 CellLabel->
  "During evaluation of \
In[640]:=",ExpressionUUID->"3e033786-8581-45f4-b2ed-476b3b363cf4"],

Cell[BoxData["0.3433572891444642`"], "Print",
 CellChangeTimes->{3.8879729854869013`*^9},
 CellLabel->
  "During evaluation of \
In[640]:=",ExpressionUUID->"1534a945-ebf8-44de-bfe7-7a82b04528a1"],

Cell[BoxData["0.32924068669437917`"], "Print",
 CellChangeTimes->{3.8879729854891357`*^9},
 CellLabel->
  "During evaluation of \
In[640]:=",ExpressionUUID->"94bd32d9-8139-41c7-9d5a-2bdce3d53860"],

Cell[BoxData["0.3139709387853673`"], "Print",
 CellChangeTimes->{3.8879729854924417`*^9},
 CellLabel->
  "During evaluation of \
In[640]:=",ExpressionUUID->"49e41e2a-4fa2-442a-b166-142e7fe29ad6"],

Cell[BoxData["0.2974392023675448`"], "Print",
 CellChangeTimes->{3.887972985494521*^9},
 CellLabel->
  "During evaluation of \
In[640]:=",ExpressionUUID->"35de657d-6a03-41cd-8abf-8cf56b63c3ab"],

Cell[BoxData["0.27952066296492034`"], "Print",
 CellChangeTimes->{3.887972985497675*^9},
 CellLabel->
  "During evaluation of \
In[640]:=",ExpressionUUID->"1b90bba9-608c-4cfb-a5de-c212c07a21f1"],

Cell[BoxData["0.2600803943017156`"], "Print",
 CellChangeTimes->{3.88797298549994*^9},
 CellLabel->
  "During evaluation of \
In[640]:=",ExpressionUUID->"5173eecd-6a65-4bcd-9036-431319732aff"],

Cell[BoxData["0.23896446234803456`"], "Print",
 CellChangeTimes->{3.8879729855032177`*^9},
 CellLabel->
  "During evaluation of \
In[640]:=",ExpressionUUID->"4112c879-e02b-473f-866c-fcf42712c651"],

Cell[BoxData["0.21600362489122776`"], "Print",
 CellChangeTimes->{3.88797298550556*^9},
 CellLabel->
  "During evaluation of \
In[640]:=",ExpressionUUID->"56d13f65-51af-4602-89a8-e718d4805f36"],

Cell[BoxData["0.19100645154196605`"], "Print",
 CellChangeTimes->{3.887972985508627*^9},
 CellLabel->
  "During evaluation of \
In[640]:=",ExpressionUUID->"bd1a3d89-aa99-491f-81c2-21c8abe0dcad"],

Cell[BoxData["0.16376195133391344`"], "Print",
 CellChangeTimes->{3.8879729855126166`*^9},
 CellLabel->
  "During evaluation of \
In[640]:=",ExpressionUUID->"4497eee9-19f8-488c-b02e-c54237280f6b"],

Cell[BoxData["0.13403130919043457`"], "Print",
 CellChangeTimes->{3.887972985514613*^9},
 CellLabel->
  "During evaluation of \
In[640]:=",ExpressionUUID->"0a7cd6c0-f2b0-496b-b741-7b93287f4a2f"],

Cell[BoxData["0.10154818167032327`"], "Print",
 CellChangeTimes->{3.887972985517597*^9},
 CellLabel->
  "During evaluation of \
In[640]:=",ExpressionUUID->"3f574e6d-ff33-4585-b880-6bde7c8b9075"]
}, Open  ]],

Cell[BoxData[
 RowBox[{"{", 
  RowBox[{
   RowBox[{"{", 
    RowBox[{"1.`", ",", "0.`"}], "}"}], ",", 
   RowBox[{"{", 
    RowBox[{"1.01`", ",", "0.07793570374249867`"}], "}"}], ",", 
   RowBox[{"{", 
    RowBox[{"1.02`", ",", "0.14137272030540166`"}], "}"}], ",", 
   RowBox[{"{", 
    RowBox[{"1.03`", ",", "0.19351360697141676`"}], "}"}], ",", 
   RowBox[{"{", 
    RowBox[{"1.04`", ",", "0.2367642249716603`"}], "}"}], ",", 
   RowBox[{"{", 
    RowBox[{"1.05`", ",", "0.27294931510272913`"}], "}"}], ",", 
   RowBox[{"{", 
    RowBox[{"1.06`", ",", "0.3034685647490397`"}], "}"}], ",", 
   RowBox[{"{", 
    RowBox[{"1.07`", ",", "0.32940389722514807`"}], "}"}], ",", 
   RowBox[{"{", 
    RowBox[{"1.08`", ",", "0.351600243238891`"}], "}"}], ",", 
   RowBox[{"{", 
    RowBox[{"1.09`", ",", "0.37072227271606556`"}], "}"}], ",", 
   RowBox[{"{", 
    RowBox[{"1.1`", ",", "0.38729733270816`"}], "}"}], ",", 
   RowBox[{"{", 
    RowBox[{"1.11`", ",", "0.40174785503513555`"}], "}"}], ",", 
   RowBox[{"{", 
    RowBox[{"1.12`", ",", "0.41441309545376026`"}], "}"}], ",", 
   RowBox[{"{", 
    RowBox[{"1.13`", ",", "0.42556903151101255`"}], "}"}], ",", 
   RowBox[{"{", 
    RowBox[{"1.1400000000000001`", ",", "0.4354398814525062`"}], "}"}], ",", 
   RowBox[{"{", 
    RowBox[{"1.15`", ",", "0.44421140075682386`"}], "}"}], ",", 
   RowBox[{"{", 
    RowBox[{"1.16`", ",", "0.4520355233665733`"}], "}"}], ",", 
   RowBox[{"{", 
    RowBox[{"1.17`", ",", "0.4590392739061662`"}], "}"}], ",", 
   RowBox[{"{", 
    RowBox[{"1.18`", ",", "0.4653292131681577`"}], "}"}], ",", 
   RowBox[{"{", 
    RowBox[{"1.19`", ",", "0.47099395344755735`"}], "}"}], ",", 
   RowBox[{"{", 
    RowBox[{"1.2`", ",", "0.4761085734105391`"}], "}"}], ",", 
   RowBox[{"{", 
    RowBox[{"1.21`", ",", "0.4807371977573276`"}], "}"}], ",", 
   RowBox[{"{", 
    RowBox[{"1.22`", ",", "0.48493359524612434`"}], "}"}], ",", 
   RowBox[{"{", 
    RowBox[{"1.23`", ",", "0.4887443137403557`"}], "}"}], ",", 
   RowBox[{"{", 
    RowBox[{"1.24`", ",", "0.4922094790709775`"}], "}"}], ",", 
   RowBox[{"{", 
    RowBox[{"1.25`", ",", "0.49536247733148975`"}], "}"}], ",", 
   RowBox[{"{", 
    RowBox[{"1.26`", ",", "0.4982335962076467`"}], "}"}], ",", 
   RowBox[{"{", 
    RowBox[{"1.27`", ",", "0.5008482257986898`"}], "}"}], ",", 
   RowBox[{"{", 
    RowBox[{"1.28`", ",", "0.503228897026337`"}], "}"}], ",", 
   RowBox[{"{", 
    RowBox[{"1.29`", ",", "0.5053939914825061`"}], "}"}], ",", 
   RowBox[{"{", 
    RowBox[{"1.3`", ",", "0.5073614910267293`"}], "}"}], ",", 
   RowBox[{"{", 
    RowBox[{"1.31`", ",", "0.5091453628113626`"}], "}"}], ",", 
   RowBox[{"{", 
    RowBox[{"1.32`", ",", "0.5107592603850535`"}], "}"}], ",", 
   RowBox[{"{", 
    RowBox[{"1.33`", ",", "0.512213448988604`"}], "}"}], ",", 
   RowBox[{"{", 
    RowBox[{"1.34`", ",", "0.5135183833192487`"}], "}"}], ",", 
   RowBox[{"{", 
    RowBox[{"1.35`", ",", "0.5146821876243377`"}], "}"}], ",", 
   RowBox[{"{", 
    RowBox[{"1.3599999999999999`", ",", "0.5157129125978023`"}], "}"}], ",", 
   RowBox[{"{", 
    RowBox[{"1.37`", ",", "0.5166165934715696`"}], "}"}], ",", 
   RowBox[{"{", 
    RowBox[{"1.38`", ",", "0.5173989490128627`"}], "}"}], ",", 
   RowBox[{"{", 
    RowBox[{"1.3900000000000001`", ",", "0.5180646746908592`"}], "}"}], ",", 
   RowBox[{"{", 
    RowBox[{"1.4`", ",", "0.5186181959535447`"}], "}"}], ",", 
   RowBox[{"{", 
    RowBox[{"1.4100000000000001`", ",", "0.5190624710006198`"}], "}"}], ",", 
   RowBox[{"{", 
    RowBox[{"1.42`", ",", "0.5194007965767551`"}], "}"}], ",", 
   RowBox[{"{", 
    RowBox[{"1.43`", ",", "0.5196354743657882`"}], "}"}], ",", 
   RowBox[{"{", 
    RowBox[{"1.44`", ",", "0.5197679686892898`"}], "}"}], ",", 
   RowBox[{"{", 
    RowBox[{"1.45`", ",", "0.5197994554569664`"}], "}"}], ",", 
   RowBox[{"{", 
    RowBox[{"1.46`", ",", "0.5197313931909623`"}], "}"}], ",", 
   RowBox[{"{", 
    RowBox[{"1.47`", ",", "0.5195633167305426`"}], "}"}], ",", 
   RowBox[{"{", 
    RowBox[{"1.48`", ",", "0.5192963303787491`"}], "}"}], ",", 
   RowBox[{"{", 
    RowBox[{"1.49`", ",", "0.5189291160832666`"}], "}"}], ",", 
   RowBox[{"{", 
    RowBox[{"1.5`", ",", "0.5184608989190417`"}], "}"}], ",", 
   RowBox[{"{", 
    RowBox[{"1.51`", ",", "0.5178906305489275`"}], "}"}], ",", 
   RowBox[{"{", 
    RowBox[{"1.52`", ",", "0.5172164766933658`"}], "}"}], ",", 
   RowBox[{"{", 
    RowBox[{"1.53`", ",", "0.5164370703494633`"}], "}"}], ",", 
   RowBox[{"{", 
    RowBox[{"1.54`", ",", "0.5155485570978126`"}], "}"}], ",", 
   RowBox[{"{", 
    RowBox[{"1.55`", ",", "0.5145491125432987`"}], "}"}], ",", 
   RowBox[{"{", 
    RowBox[{"1.56`", ",", "0.5134349803453528`"}], "}"}], ",", 
   RowBox[{"{", 
    RowBox[{"1.57`", ",", "0.5122025991290596`"}], "}"}], ",", 
   RowBox[{"{", 
    RowBox[{"1.58`", ",", "0.5108469780333583`"}], "}"}], ",", 
   RowBox[{"{", 
    RowBox[{"1.5899999999999999`", ",", "0.5093643267516136`"}], "}"}], ",", 
   RowBox[{"{", 
    RowBox[{"1.6`", ",", "0.5077483340786059`"}], "}"}], ",", 
   RowBox[{"{", 
    RowBox[{"1.6099999999999999`", ",", "0.5059937798178127`"}], "}"}], ",", 
   RowBox[{"{", 
    RowBox[{"1.62`", ",", "0.504093038805052`"}], "}"}], ",", 
   RowBox[{"{", 
    RowBox[{"1.63`", ",", "0.5020403346808672`"}], "}"}], ",", 
   RowBox[{"{", 
    RowBox[{"1.6400000000000001`", ",", "0.49982704963301205`"}], "}"}], ",", 
   RowBox[{"{", 
    RowBox[{"1.65`", ",", "0.4974445318405328`"}], "}"}], ",", 
   RowBox[{"{", 
    RowBox[{"1.6600000000000001`", ",", "0.494883079933159`"}], "}"}], ",", 
   RowBox[{"{", 
    RowBox[{"1.67`", ",", "0.49213250144569703`"}], "}"}], ",", 
   RowBox[{"{", 
    RowBox[{"1.6800000000000002`", ",", "0.4891816018164789`"}], "}"}], ",", 
   RowBox[{"{", 
    RowBox[{"1.69`", ",", "0.48601761833664864`"}], "}"}], ",", 
   RowBox[{"{", 
    RowBox[{"1.7000000000000002`", ",", "0.48262747027047315`"}], "}"}], ",", 
   RowBox[{"{", 
    RowBox[{"1.71`", ",", "0.47899527504406725`"}], "}"}], ",", 
   RowBox[{"{", 
    RowBox[{"1.72`", ",", "0.47510611196053404`"}], "}"}], ",", 
   RowBox[{"{", 
    RowBox[{"1.73`", ",", "0.4709412002324579`"}], "}"}], ",", 
   RowBox[{"{", 
    RowBox[{"1.74`", ",", "0.46648203848558617`"}], "}"}], ",", 
   RowBox[{"{", 
    RowBox[{"1.75`", ",", "0.46170655474856787`"}], "}"}], ",", 
   RowBox[{"{", 
    RowBox[{"1.76`", ",", "0.45659244230901724`"}], "}"}], ",", 
   RowBox[{"{", 
    RowBox[{"1.77`", ",", "0.4511135308975089`"}], "}"}], ",", 
   RowBox[{"{", 
    RowBox[{"1.78`", ",", "0.44524156033743756`"}], "}"}], ",", 
   RowBox[{"{", 
    RowBox[{"1.79`", ",", "0.438946872698549`"}], "}"}], ",", 
   RowBox[{"{", 
    RowBox[{"1.8`", ",", "0.43219524903190754`"}], "}"}], ",", 
   RowBox[{"{", 
    RowBox[{"1.81`", ",", "0.42494966730588435`"}], "}"}], ",", 
   RowBox[{"{", 
    RowBox[{"1.82`", ",", "0.4171703704264162`"}], "}"}], ",", 
   RowBox[{"{", 
    RowBox[{"1.83`", ",", "0.40881188091978543`"}], "}"}], ",", 
   RowBox[{"{", 
    RowBox[{"1.8399999999999999`", ",", "0.3998247798008114`"}], "}"}], ",", 
   RowBox[{"{", 
    RowBox[{"1.85`", ",", "0.39015576485607256`"}], "}"}], ",", 
   RowBox[{"{", 
    RowBox[{"1.8599999999999999`", ",", "0.3797442894650221`"}], "}"}], ",", 
   RowBox[{"{", 
    RowBox[{"1.87`", ",", "0.36852393574062975`"}], "}"}], ",", 
   RowBox[{"{", 
    RowBox[{"1.88`", ",", "0.35642262327865337`"}], "}"}], ",", 
   RowBox[{"{", 
    RowBox[{"1.8900000000000001`", ",", "0.3433572891444642`"}], "}"}], ",", 
   RowBox[{"{", 
    RowBox[{"1.9`", ",", "0.32924068669437917`"}], "}"}], ",", 
   RowBox[{"{", 
    RowBox[{"1.9100000000000001`", ",", "0.3139709387853673`"}], "}"}], ",", 
   RowBox[{"{", 
    RowBox[{"1.92`", ",", "0.2974392023675448`"}], "}"}], ",", 
   RowBox[{"{", 
    RowBox[{"1.9300000000000002`", ",", "0.27952066296492034`"}], "}"}], ",", 
   RowBox[{"{", 
    RowBox[{"1.94`", ",", "0.2600803943017156`"}], "}"}], ",", 
   RowBox[{"{", 
    RowBox[{"1.9500000000000002`", ",", "0.23896446234803456`"}], "}"}], ",", 
   RowBox[{"{", 
    RowBox[{"1.96`", ",", "0.21600362489122776`"}], "}"}], ",", 
   RowBox[{"{", 
    RowBox[{"1.97`", ",", "0.19100645154196605`"}], "}"}], ",", 
   RowBox[{"{", 
    RowBox[{"1.98`", ",", "0.16376195133391344`"}], "}"}], ",", 
   RowBox[{"{", 
    RowBox[{"1.99`", ",", "0.13403130919043457`"}], "}"}], ",", 
   RowBox[{"{", 
    RowBox[{"2.`", ",", "0.10154818167032327`"}], "}"}]}], "}"}]], "Output",
 CellChangeTimes->{3.887964797363864*^9, 3.8879659440434093`*^9, 
  3.8879665527981977`*^9, 3.887966955309982*^9, 3.8879670501236753`*^9, 
  3.8879674108079777`*^9, 3.8879676778836823`*^9, 3.887967790312127*^9, 
  3.887968547286273*^9, 3.887968663087159*^9, 3.887968803324152*^9, 
  3.887968903878867*^9, 3.8879689973725615`*^9, 3.887969460748516*^9, 
  3.887969770353671*^9, 3.8879702257294025`*^9, 3.8879703513973036`*^9, 
  3.8879704589491725`*^9, 3.8879709340112624`*^9, 3.8879710554506817`*^9, 
  3.887971146533717*^9, 3.8879718441814237`*^9, 3.8879721636919413`*^9, 
  3.8879729857831554`*^9},
 CellLabel->
  "Out[646]=",ExpressionUUID->"85fc3612-768f-4239-91b0-700f4205962f"],

Cell[BoxData[
 GraphicsBox[{{}, {{}, {}, 
    {RGBColor[0.368417, 0.506779, 0.709798], PointSize[0.009166666666666668], 
     AbsoluteThickness[1.6], LineBox[CompressedData["
1:eJw11QtQVGUUB3DEBIFR1FZCSgxpEDDxOb0E/swwRjAKQfmASEgBTVMwRB4Z
r9x0JhXKASRNaUEpxxxBeWkZASaWvEJYYdndCygFKO77xT7avZx7Zu7cO/PN
959zvt98c712pcYk29vZ2SVbH9t7pmTgvvzii1rUvjKktLcuP6u8gZhGT/5k
tAyF87225ru34AvetbDhHBnC9YK/5t1tR1VakLOwUoYtotObIiI70fHAVjKc
DMzYY5fVA42vLVAG52NB+xw/68Uya1qjpxy6Q2mLVbw+vDecY02UQ12QG3kh
vx+HbHFpcsxq2DI+3iTE9+W2kmN5d3pzzv1HaFXbAuWo3VwtCKwfwNNoW4Ny
FH5lV3CHPwi2PZ4CV6e8HvMDRQi2xQUp8Pu5U4GQiJDClgKNtder1QeGYJs2
vkgB0baEPT5TQ2DHbVTg0v6Q0LFEMdj2hhVoK3o5QHVPDDbOWYlm+ZV/Wl+T
YD1bStwPcHIvzpKAPb54JQ7/VKJMbpOAHZevxK7FvEkfJynY9q4p4XL733dK
w6Rg44RKDDsMrI7Pl5KDCkezlT0v3JRixkOF1N92+ruOSslDhXRei0jhwJCH
Cv4rHx9N92DIw7o/6dU5a15nyEMFl7oU/8hAhjxUiJ3Y9OZkBEMeasQdft7h
vYMhDzVmh+VlzEtiyEON/xzbPe4cZMhDjTttGffezWLAHl+LGglpDR835jPk
oUaxXQ1/2QmGPDRYJbwYdOI0Qx4aPIlJ3Gk8w5CHBpFJwtX8swyK2UANEifW
jPmeZ8hDg4i5cfunLjDkocEPLY5nBisY8tAi7mliquxHhjy08Iupy1wnYMhD
C3Hd/NuV1vUZDy0Wj9Yg1Lp/xkMLuceX21605s94aBEr6N648BxDHjoMl1RG
bSxjyEOHiHLvhKLvGPLQwe2Nb751OsV56NCrV8yt/prz0GGU73g9IY/z0KHh
SfSN1Zmchw7OJT7rXA9yHnrUPOff1OzmPPRYGGRqEVl92Lg0PVbVV+2r38x5
6IGJgNRscB56HM53kixZy3noYRjJbjruxXkY8Mmm7Y/rF3AeBpiXqsv8TVLy
MCB8gbrUq19KHgaMO0zw/K9KycOApYXN0UvypBhhPQy40ZsS2xwpJY9prAy3
rxr3kGID6zGNBRVBH+4c5e7HNP5c9f4DUTV3P6bx6eyQTO+9EvKYhqRsa9GY
t4Q8pnFgVJwjHBSThxFl53G5/KSYPIxwiXtY0PWWmDyMOP52XriLdIg8jHB3
8szozx0iDyOEplsXb740RB5GuM2dE+r2s4g8jNhQNuyWuE5EHiZ0iTPiJmsH
ycOEOYtqIvV+g+Rhgrd5+9VbpQPkYULH3fKRKN0j8jDhGc/BfGvLI/IwIdRH
ue9JiZA8zMj6QNBX0dVPHmbYW54NFOv7yMOMtR9lHg9b1EceZhwrzi1e4v6Q
PKzrI7+kBjv1kocZ/OQ8wZXRHvKwYG+vJtD3Ujd5WHA7fcf63aWd5GFBZ1/8
r7Mu/00eFuiiYjH2eTt5WJB6pLrbR9NGHhasONL5imzFH9x/I6TOMfieq6UJ
/wPE5i5p
      "]]}}, {{}, {}}},
  AspectRatio->NCache[GoldenRatio^(-1), 0.6180339887498948],
  Axes->{True, True},
  AxesLabel->{None, None},
  AxesOrigin->{0.9791666666666691, 0},
  DisplayFunction->Identity,
  Frame->{{False, False}, {False, False}},
  FrameLabel->{{None, None}, {None, None}},
  FrameTicks->{{Automatic, Automatic}, {Automatic, Automatic}},
  GridLines->{None, None},
  GridLinesStyle->Directive[
    GrayLevel[0.5, 0.4]],
  Method->{
   "AxisPadding" -> Scaled[0.02], "DefaultBoundaryStyle" -> Automatic, 
    "DefaultGraphicsInteraction" -> {
     "Version" -> 1.2, "TrackMousePosition" -> {True, False}, 
      "Effects" -> {
       "Highlight" -> {"ratio" -> 2}, "HighlightPoint" -> {"ratio" -> 2}, 
        "Droplines" -> {
         "freeformCursorMode" -> True, 
          "placement" -> {"x" -> "All", "y" -> "None"}}}}, "DefaultMeshStyle" -> 
    AbsolutePointSize[6], "DefaultPlotStyle" -> {
      Directive[
       RGBColor[0.368417, 0.506779, 0.709798], 
       AbsoluteThickness[1.6]], 
      Directive[
       RGBColor[0.880722, 0.611041, 0.142051], 
       AbsoluteThickness[1.6]], 
      Directive[
       RGBColor[0.560181, 0.691569, 0.194885], 
       AbsoluteThickness[1.6]], 
      Directive[
       RGBColor[0.922526, 0.385626, 0.209179], 
       AbsoluteThickness[1.6]], 
      Directive[
       RGBColor[0.528488, 0.470624, 0.701351], 
       AbsoluteThickness[1.6]], 
      Directive[
       RGBColor[0.772079, 0.431554, 0.102387], 
       AbsoluteThickness[1.6]], 
      Directive[
       RGBColor[0.363898, 0.618501, 0.782349], 
       AbsoluteThickness[1.6]], 
      Directive[
       RGBColor[1, 0.75, 0], 
       AbsoluteThickness[1.6]], 
      Directive[
       RGBColor[0.647624, 0.37816, 0.614037], 
       AbsoluteThickness[1.6]], 
      Directive[
       RGBColor[0.571589, 0.586483, 0.], 
       AbsoluteThickness[1.6]], 
      Directive[
       RGBColor[0.915, 0.3325, 0.2125], 
       AbsoluteThickness[1.6]], 
      Directive[
       RGBColor[0.40082222609352647`, 0.5220066643438841, 0.85], 
       AbsoluteThickness[1.6]], 
      Directive[
       RGBColor[0.9728288904374106, 0.621644452187053, 0.07336199581899142], 
       AbsoluteThickness[1.6]], 
      Directive[
       RGBColor[0.736782672705901, 0.358, 0.5030266573755369], 
       AbsoluteThickness[1.6]], 
      Directive[
       RGBColor[0.28026441037696703`, 0.715, 0.4292089322474965], 
       AbsoluteThickness[1.6]]}, "DomainPadding" -> Scaled[0.02], 
    "PointSizeFunction" -> "SmallPointSize", "RangePadding" -> Scaled[0.05], 
    "OptimizePlotMarkers" -> True, "OptimizePlotMarkers" -> True, 
    "CoordinatesToolOptions" -> {"DisplayFunction" -> ({
        Identity[
         Part[#, 1]], 
        Identity[
         Part[#, 2]]}& ), "CopiedValueFunction" -> ({
        Identity[
         Part[#, 1]], 
        Identity[
         Part[#, 2]]}& )}},
  PlotRange->{{0.9791666666666691, 2.}, {0, 0.5197994554569664}},
  PlotRangeClipping->True,
  PlotRangePadding->{{
     Scaled[0.02], 
     Scaled[0.02]}, {
     Scaled[0.02], 
     Scaled[0.05]}},
  Ticks->{Automatic, Automatic}]], "Output",
 CellChangeTimes->{3.887964797363864*^9, 3.8879659440434093`*^9, 
  3.8879665527981977`*^9, 3.887966955309982*^9, 3.8879670501236753`*^9, 
  3.8879674108079777`*^9, 3.8879676778836823`*^9, 3.887967790312127*^9, 
  3.887968547286273*^9, 3.887968663087159*^9, 3.887968803324152*^9, 
  3.887968903878867*^9, 3.8879689973725615`*^9, 3.887969460748516*^9, 
  3.887969770353671*^9, 3.8879702257294025`*^9, 3.8879703513973036`*^9, 
  3.8879704589491725`*^9, 3.8879709340112624`*^9, 3.8879710554506817`*^9, 
  3.887971146533717*^9, 3.8879718441814237`*^9, 3.8879721636919413`*^9, 
  3.887972985826676*^9},
 CellLabel->
  "Out[647]=",ExpressionUUID->"befb92e4-f17e-4e46-a69b-6bf09d8c9b2e"]
}, Open  ]],

Cell[CellGroupData[{

Cell[BoxData[{
 RowBox[{
  RowBox[{"bb", "=", 
   RowBox[{
    RowBox[{"bval2", "[", 
     RowBox[{"[", "1", "]"}], "]"}], "[", 
    RowBox[{"[", "2", "]"}], "]"}]}], "\[IndentingNewLine]", 
  RowBox[{"(*", 
   RowBox[{"Pzz", "=", 
    RowBox[{
     RowBox[{"bval2", "[", 
      RowBox[{"[", "2", "]"}], "]"}], "[", 
     RowBox[{"[", "2", "]"}], "]"}]}], "*)"}]}], "\[IndentingNewLine]", 
 RowBox[{
  RowBox[{
   RowBox[{"shradi", "[", "r_", "]"}], ":=", 
   RowBox[{
    RowBox[{"(", 
     FractionBox[
      RowBox[{"Gamma", "[", "\[Beta]", "]"}], "2"], ")"}], "*", 
    RowBox[{"(", 
     RowBox[{
      FractionBox[
       RowBox[{
        SuperscriptBox["bb", "2"], "*", 
        SuperscriptBox["RR", "2"]}], "r"], "-", "r"}], ")"}], "*", 
    RowBox[{"MittagLefflerE", "[", 
     RowBox[{"\[Alpha]", ",", "\[Beta]", ",", 
      RowBox[{
       RowBox[{"(", 
        FractionBox[
         RowBox[{"\[CurlyEpsilon]", "*", 
          SuperscriptBox["Wi", "2"]}], "2"], ")"}], "*", 
       SuperscriptBox[
        RowBox[{"(", 
         RowBox[{
          FractionBox[
           RowBox[{
            SuperscriptBox["bb", "2"], "*", 
            SuperscriptBox["RR", "2"]}], "r"], "-", "r"}], ")"}], "2"]}]}], 
     "]"}]}]}], ";"}], "\[IndentingNewLine]", 
 RowBox[{"Do", "[", 
  RowBox[{
   RowBox[{"Print", "[", 
    RowBox[{"shradi", "[", "i", "]"}], "]"}], ",", 
   RowBox[{"{", 
    RowBox[{"i", ",", "1", ",", "2", ",", "0.01"}], "}"}]}], 
  "]"}], "\[IndentingNewLine]", 
 RowBox[{
  RowBox[{
   RowBox[{"u", "[", "y_", "]"}], ":=", 
   RowBox[{"NIntegrate", "[", 
    RowBox[{
     RowBox[{"shradi", "[", "r", "]"}], ",", 
     RowBox[{"{", 
      RowBox[{"r", ",", 
       RowBox[{"a", "*", "RR"}], ",", "y"}], "}"}]}], "]"}]}], 
  ";"}], "\[IndentingNewLine]", 
 RowBox[{"Table", "[", 
  RowBox[{
   RowBox[{"{", 
    RowBox[{"i", ",", 
     RowBox[{"u", "[", "i", "]"}]}], "}"}], ",", 
   RowBox[{"{", 
    RowBox[{"i", ",", "1", ",", "2", ",", "0.01"}], "}"}]}], 
  "]"}], "\[IndentingNewLine]", 
 RowBox[{"ListPlot", "[", 
  RowBox[{"%", ",", 
   RowBox[{"Joined", "\[Rule]", "True"}]}], "]"}]}], "Input",
 CellChangeTimes->CompressedData["
1:eJxTTMoPSmViYGAQBWIQ7V6+Q4Y97Y3jR5EQORC94FemEoi+8/mFKohmWVG5
FkTvMrfeCKIfR5QV2Jx44zjt1T4wvUT1zzIQPSM8YDmIlvt6czeIFqmV2AOi
45p8j4DoWQqVx0F0hUiXqi2Q7px5E0yrNNUbgGifg6mGIDps1QQzEH3q1zYL
EF2YdcUNRP9iEPAC0W7JBSEg2mCeQwSINuN5Mi0dSOt7/wTTJzaLN0wE0l1L
FzaC6BzzUxlTgXSSn1w+iC569+IWiDa4rXwbRE+1mJU0DUhnP7gKpos2930H
0fNmC/8G0TcjIrQ6vr5xnPRjuTaIZvBwqQTRHJZ1VSB6dYbYg9hvbxxFQ+0e
gmgAWiax0g==
  "],
 CellLabel->
  "In[628]:=",ExpressionUUID->"f3e3aa5e-80f8-426a-8e73-253ba1578f0c"],

Cell[BoxData["0.72354925840204070545194116018934335295`12."], "Output",
 CellChangeTimes->{3.887967063614456*^9, 3.887972055474936*^9, 
  3.8879723916599665`*^9},
 CellLabel->
  "Out[628]=",ExpressionUUID->"68a5e072-102a-485f-8131-88fff3904cad"],

Cell[BoxData[
 GraphicsBox[{{}, {{}, {}, 
    {RGBColor[0.368417, 0.506779, 0.709798], PointSize[0.009166666666666668], 
     AbsoluteThickness[1.6], LineBox[CompressedData["
1:eJw11XlMVFcUBnCwJSS0EcQFUwGBCqViBa0QluCHRgtqREVbLaVgVKqmhEXT
aMGASrFEm4IbihKlgjUIZRXLHpRMGZWBefOuhUIpi1iL2DrMPsxW5nnmJDf3
vX++nHN/ubne+9LikufY2dklzy7r/qbksH19mFDwUO0vx4mRssfnxKWIa/LM
m9ohR2Pz7fyauhpkLaiOHsuUw5Q+79PcE/dRnh7p1F8mh99al/DSw22Q9FhL
jjnVBrf9Q53Q+FsD5cgQ13F1EV1YOpvW5DkNU3xTjEeiCDFjmbOJ0xi3SIMn
NnUjwxqXPo1av+zkWIdHuFZsrWns+SXKnrv8GF1qa+A0HnBmh4/sevBqh7XB
aTRvyJ7Mj5FAaG+BAlnDfuvOHOnFWmtcpALRta8W7jrVh6+EUqA3ICBsJEIK
67QJBQp8H7Kpz6NKCmHcJgUC/X0as1w5CO2NKXDsraLD/6VxEOKclLj4g7/v
NhGHj4VSotDlg4OJ82UQji9BiRVevm93x8sgjJunxB9FQ2KvEhmE9qqVeH5n
7wNFvwxCXL8SKZM+qxvn8uSgguMt5VY+iscbDxXmqSvqq1J58lDh75r0e0VX
efJQoWFjUfZwB08eKiyIrHEWjfHkoUK5v3nhWXtGHiqcWRZfu8+TkYcaQy2B
bjmhjDzUaN/cEOS0nZGHGqK8KdflyYw81Ah9d+gbu+MMwvE9VEM21uFWmc/I
Qw17H9eFG64w8tDA3aMneLyMkYcGum1LVhVXM/LQYNH79/759leGQiFQg0ll
ecmFDkYeGnxdfXLx6y5GHhqcPHh58Go3Iw8thuN6gq88YuShxejZ1tTXs/9v
PLTYpUti5WJGHloc4J+zJhEjDy0K9w/MDXjAyEOLgDyHJH0LIw8dHJ9+NrW0
gZGHDinmgeXFFYw8dFi2x3vqyxuMPHTgrofvTD7PyEMH93/DJ8pPM/LQwTnn
5jGXIzYPHXKefhdxLcnmocclTlK1eovNQ4/42OgC8RoGIS5dj41usmcx7jYP
PXaj+M8b9jYPPcxpu/saJnjy0CMw765vmognjxkMNWdsuV/Gk8cMopoDr6fk
8OQxAz+3gzFH9/DkMYOzyonoipU8ecwge+Rl8JQ9j3HBYwZdR/zC58tk5GFA
UeK+Sd0NGdYIHgbk+w4uyzhkux8GlKkWabeutN0PAyr3h6UmyjnyMODFkvNH
U6s58jCg59ze0k8OceRhRNjQHecqD448jJiK7luxt1dKHkYEPXPI8cqUkocR
v3/ul/Gzl5Q8jNBOjgTE5vaRhxGBbW3S28295GGEvF7iXPlMQh4m5K9rHb1r
JyEPE0Jyc+NfOPeQhwmVojiXKy5PyMOEzsWOBybsH5OHCcOWDsmrcTF5mBB0
R+zWWd9NHmbE3Yr4MSn9N/IwY5F3lnf7eyLyMEPcxGW21HaRhxmGkM1z/Fc9
JA8zxo4Psq5rneRhxvhPT3ZmDLSThwUnsDg2LKaFPCxghXHrR0/dJw8Ltq+o
uhB6up48LCjZftO1+1wVeVjg4vVFY8mFMvKwIGjey79afS7Z3o2o2fXO+lvJ
a/8HBKYrog==
      "]]}}, {{}, {}}},
  AspectRatio->NCache[GoldenRatio^(-1), 0.6180339887498948],
  Axes->{True, True},
  AxesLabel->{None, None},
  AxesOrigin->{0.9791666666666691, 0},
  DisplayFunction->Identity,
  Frame->{{False, False}, {False, False}},
  FrameLabel->{{None, None}, {None, None}},
  FrameTicks->{{Automatic, Automatic}, {Automatic, Automatic}},
  GridLines->{None, None},
  GridLinesStyle->Directive[
    GrayLevel[0.5, 0.4]],
  Method->{
   "AxisPadding" -> Scaled[0.02], "DefaultBoundaryStyle" -> Automatic, 
    "DefaultGraphicsInteraction" -> {
     "Version" -> 1.2, "TrackMousePosition" -> {True, False}, 
      "Effects" -> {
       "Highlight" -> {"ratio" -> 2}, "HighlightPoint" -> {"ratio" -> 2}, 
        "Droplines" -> {
         "freeformCursorMode" -> True, 
          "placement" -> {"x" -> "All", "y" -> "None"}}}}, "DefaultMeshStyle" -> 
    AbsolutePointSize[6], "DefaultPlotStyle" -> {
      Directive[
       RGBColor[0.368417, 0.506779, 0.709798], 
       AbsoluteThickness[1.6]], 
      Directive[
       RGBColor[0.880722, 0.611041, 0.142051], 
       AbsoluteThickness[1.6]], 
      Directive[
       RGBColor[0.560181, 0.691569, 0.194885], 
       AbsoluteThickness[1.6]], 
      Directive[
       RGBColor[0.922526, 0.385626, 0.209179], 
       AbsoluteThickness[1.6]], 
      Directive[
       RGBColor[0.528488, 0.470624, 0.701351], 
       AbsoluteThickness[1.6]], 
      Directive[
       RGBColor[0.772079, 0.431554, 0.102387], 
       AbsoluteThickness[1.6]], 
      Directive[
       RGBColor[0.363898, 0.618501, 0.782349], 
       AbsoluteThickness[1.6]], 
      Directive[
       RGBColor[1, 0.75, 0], 
       AbsoluteThickness[1.6]], 
      Directive[
       RGBColor[0.647624, 0.37816, 0.614037], 
       AbsoluteThickness[1.6]], 
      Directive[
       RGBColor[0.571589, 0.586483, 0.], 
       AbsoluteThickness[1.6]], 
      Directive[
       RGBColor[0.915, 0.3325, 0.2125], 
       AbsoluteThickness[1.6]], 
      Directive[
       RGBColor[0.40082222609352647`, 0.5220066643438841, 0.85], 
       AbsoluteThickness[1.6]], 
      Directive[
       RGBColor[0.9728288904374106, 0.621644452187053, 0.07336199581899142], 
       AbsoluteThickness[1.6]], 
      Directive[
       RGBColor[0.736782672705901, 0.358, 0.5030266573755369], 
       AbsoluteThickness[1.6]], 
      Directive[
       RGBColor[0.28026441037696703`, 0.715, 0.4292089322474965], 
       AbsoluteThickness[1.6]]}, "DomainPadding" -> Scaled[0.02], 
    "PointSizeFunction" -> "SmallPointSize", "RangePadding" -> Scaled[0.05], 
    "OptimizePlotMarkers" -> True, "OptimizePlotMarkers" -> True, 
    "CoordinatesToolOptions" -> {"DisplayFunction" -> ({
        Identity[
         Part[#, 1]], 
        Identity[
         Part[#, 2]]}& ), "CopiedValueFunction" -> ({
        Identity[
         Part[#, 1]], 
        Identity[
         Part[#, 2]]}& )}},
  PlotRange->{{0.9791666666666691, 2.}, {0, 0.32482515157441405`}},
  PlotRangeClipping->True,
  PlotRangePadding->{{
     Scaled[0.02], 
     Scaled[0.02]}, {
     Scaled[0.02], 
     Scaled[0.05]}},
  Ticks->{Automatic, Automatic}]], "Output",
 CellChangeTimes->{3.887967063614456*^9, 3.887972055474936*^9, 
  3.8879723925003185`*^9},
 CellLabel->
  "Out[633]=",ExpressionUUID->"37dc04f9-b83a-4bfe-9637-1d1dd5599e77"]
}, Open  ]],

Cell[BoxData[
 RowBox[{
  RowBox[{
  "Obter", " ", "velocidades", " ", "para", " ", "fazer", " ", 
   "gr\[AAcute]ficos", " ", "no", " ", "Excell"}], 
  "\[IndentingNewLine]"}]], "Input",
 CellChangeTimes->{{3.863173063992695*^9, 3.8631730773729844`*^9}},
 Background->RGBColor[
  0.87, 0.94, 1],ExpressionUUID->"7d36c13f-c600-443e-8d42-4998a9c86b8f"],

Cell[BoxData[
 RowBox[{"Do", "[", 
  RowBox[{
   RowBox[{"Print", "[", 
    RowBox[{"u", "[", "i", "]"}], "]"}], ",", 
   RowBox[{"{", 
    RowBox[{"i", ",", "1", ",", "2", ",", "0.01"}], "}"}]}], "]"}]], "Input",
 CellChangeTimes->{
  3.886826990984099*^9, {3.8868274656914573`*^9, 
   3.886827466836336*^9}},ExpressionUUID->"9bfbb48c-4d6b-4c8e-8416-\
d918f22bc7d0"],

Cell[BoxData[
 RowBox[{"\[IndentingNewLine]", 
  RowBox[{
   RowBox[{
   "Testes", " ", "que", " ", "foram", " ", "feitos", " ", "no", " ", 
    "desenvolvimento", " ", "do", " ", "prgrama", " ", 
    RowBox[{"(", 
     RowBox[{"n\[ATilde]o", " ", "correr", " ", "isto"}], ")"}]}], 
   "\[IndentingNewLine]"}]}]], "Input",
 CellChangeTimes->{{3.8631729522376137`*^9, 3.8631729849041033`*^9}},
 Background->RGBColor[
  0.94, 0.91, 0.88],ExpressionUUID->"68a3778d-d2d4-4e8d-9e12-cbf01d07ff82"],

Cell[BoxData[{
 RowBox[{
  RowBox[{"Clear", "[", "\"\<Global`*\>\"", "]"}], 
  ";"}], "\[IndentingNewLine]", 
 RowBox[{
  RowBox[{"\[Alpha]", "=", "1"}], ";"}], "\[IndentingNewLine]", 
 RowBox[{
  RowBox[{"\[Beta]", "=", "1"}], ";"}], "\[IndentingNewLine]", 
 RowBox[{
  RowBox[{"\[Lambda]", "=", 
   RowBox[{"1", "/", "1"}]}], ";"}], "\[IndentingNewLine]", 
 RowBox[{
  RowBox[{"\[Eta]", "=", "1"}], ";"}], "\[IndentingNewLine]", 
 RowBox[{
  RowBox[{"\[CurlyEpsilon]", "=", 
   RowBox[{"5", "/", "100"}]}], ";"}], "\[IndentingNewLine]", 
 RowBox[{
  RowBox[{"Wi", "=", "1"}], ";"}], "\[IndentingNewLine]", 
 RowBox[{
  RowBox[{"a", "=", 
   RowBox[{"1", "/", "2"}]}], ";"}], "\[IndentingNewLine]", 
 RowBox[{
  RowBox[{"RR", "=", 
   RowBox[{"1", "/", 
    RowBox[{"(", 
     RowBox[{"1", "-", "a"}], ")"}]}]}], ";"}], "\[IndentingNewLine]", 
 RowBox[{
  RowBox[{"Pz", "=", 
   RowBox[{"-", "1"}]}], ";"}]}], "Input",
 CellChangeTimes->{{3.8630966145024614`*^9, 3.863096614563458*^9}, {
  3.863096836053093*^9, 3.8630968364350233`*^9}},
 CellLabel->
  "In[191]:=",ExpressionUUID->"ce6bc35d-fb6b-4f98-ac0e-5b43ec22abfe"],

Cell[CellGroupData[{

Cell[BoxData[{
 RowBox[{
  RowBox[{"k", "=", "0"}], ";"}], "\[IndentingNewLine]", 
 RowBox[{"Integrate", "[", 
  RowBox[{
   FractionBox[
    RowBox[{
     SuperscriptBox[
      RowBox[{"(", 
       FractionBox[
        RowBox[{"\[CurlyEpsilon]", "*", 
         SuperscriptBox["Wi", "2"], "*", 
         SuperscriptBox["Pz", "2"]}], "2"], ")"}], "k"], "*", 
     SuperscriptBox[
      RowBox[{"(", 
       RowBox[{
        FractionBox[
         RowBox[{
          SuperscriptBox["b", "2"], "*", 
          SuperscriptBox["RR", "2"]}], "r"], "-", "r"}], ")"}], 
      RowBox[{
       RowBox[{"2", "*", "k"}], "+", "1"}]]}], 
    RowBox[{"Gamma", "[", 
     RowBox[{
      RowBox[{"\[Alpha]", "*", "k"}], "+", "\[Beta]"}], "]"}]], ",", "r"}], 
  "]"}]}], "Input",
 CellChangeTimes->{3.863168426516797*^9},
 CellLabel->
  "In[201]:=",ExpressionUUID->"e35824b0-523e-46d8-8e57-4b9cf6553235"],

Cell[BoxData[
 RowBox[{
  RowBox[{"-", 
   FractionBox[
    SuperscriptBox["r", "2"], "2"]}], "+", 
  RowBox[{"4", " ", 
   SuperscriptBox["b", "2"], " ", 
   RowBox[{"Log", "[", "r", "]"}]}]}]], "Output",
 CellChangeTimes->{3.8631684334916697`*^9},
 CellLabel->
  "Out[202]=",ExpressionUUID->"14afccf1-623a-4084-a620-fa9d9de8300d"]
}, Open  ]],

Cell[CellGroupData[{

Cell[BoxData[{
 RowBox[{
  RowBox[{"k", "=", "0"}], ";"}], "\[IndentingNewLine]", 
 RowBox[{"Integrate", "[", 
  RowBox[{
   SuperscriptBox[
    RowBox[{"(", 
     RowBox[{
      FractionBox["A", "r"], "-", "r"}], ")"}], 
    RowBox[{
     RowBox[{"2", "*", "k"}], "+", "1"}]], ",", "r"}], "]"}]}], "Input",
 CellChangeTimes->{{3.8116012822449903`*^9, 3.8116013065739326`*^9}, {
  3.8116015209632697`*^9, 3.811601557941798*^9}, {3.863095263264696*^9, 
  3.8630952637530346`*^9}, {3.8630965041416407`*^9, 3.863096518320962*^9}, {
  3.863096649685605*^9, 3.8630966601844244`*^9}, {3.863096715552375*^9, 
  3.863096726459222*^9}, {3.8630972083714485`*^9, 3.8630972439234447`*^9}, {
  3.8630973070553303`*^9, 3.8630973251943903`*^9}, {3.863097425503493*^9, 
  3.8630974279301233`*^9}},
 CellLabel->
  "In[203]:=",ExpressionUUID->"027b031e-66cd-44ab-9354-2b5f43305f5b"],

Cell[BoxData[
 RowBox[{
  RowBox[{"-", 
   FractionBox[
    SuperscriptBox["r", "2"], "2"]}], "+", 
  RowBox[{"A", " ", 
   RowBox[{"Log", "[", "r", "]"}]}]}]], "Output",
 CellChangeTimes->{
  3.811601308194543*^9, 3.811601560029109*^9, {3.8630952795350657`*^9, 
   3.863095309197896*^9}, 3.8630965201605144`*^9, {3.8630966268519073`*^9, 
   3.863096660960532*^9}, 3.8630967277545843`*^9, {3.8630968308031263`*^9, 
   3.8630968389730873`*^9}, {3.8630972145609837`*^9, 3.8630972444304047`*^9}, 
   3.8630973263781204`*^9, 3.863097429884115*^9, 3.8631684371660395`*^9},
 CellLabel->
  "Out[204]=",ExpressionUUID->"633c1297-b269-48ea-9e3a-0b75f84906fa"]
}, Open  ]],

Cell[BoxData[{
 RowBox[{
  RowBox[{"k", "=", "1"}], ";"}], "\[IndentingNewLine]", 
 RowBox[{"Integrate", "[", 
  RowBox[{
   SuperscriptBox[
    RowBox[{"(", 
     RowBox[{
      FractionBox["A", "r"], "-", "r"}], ")"}], 
    RowBox[{
     RowBox[{"2", "*", "k"}], "+", "1"}]], ",", "r"}], "]"}]}], "Input",
 CellChangeTimes->{{3.8630972575504074`*^9, 3.863097257666405*^9}, {
  3.863097334649268*^9, 3.86309733905027*^9}, {3.8630974391632957`*^9, 
  3.8630974433701158`*^9}},
 CellLabel->"In[82]:=",ExpressionUUID->"7de0f221-483f-475a-aa0c-c356c561aadf"],

Cell[BoxData[
 RowBox[{
  RowBox[{"-", 
   FractionBox[
    SuperscriptBox["A", "3"], 
    RowBox[{"2", " ", 
     SuperscriptBox["r", "2"]}]]}], "+", 
  FractionBox[
   RowBox[{"3", " ", "A", " ", 
    SuperscriptBox["r", "2"]}], "2"], "-", 
  FractionBox[
   SuperscriptBox["r", "4"], "4"], "-", 
  RowBox[{"3", " ", 
   SuperscriptBox["A", "2"], " ", 
   RowBox[{"Log", "[", "r", "]"}]}]}]], "Input",
 CellChangeTimes->{{3.8873669453802576`*^9, 
  3.8873669868325663`*^9}},ExpressionUUID->"2adc81d2-d51d-49dc-8e35-\
0dcd56225cc1"],

Cell[BoxData[""], "Input",
 CellChangeTimes->{{3.8873669910731964`*^9, 
  3.887366994502146*^9}},ExpressionUUID->"dc192912-b160-41bc-bd85-\
fe1712fb3093"]
},
WindowSize->{1141.2, 573.6},
WindowMargins->{{0, Automatic}, {Automatic, 0}},
Magnification:>0.75 Inherited,
FrontEndVersion->"13.2 for Microsoft Windows (64-bit) (January 30, 2023)",
StyleDefinitions->"Default.nb",
ExpressionUUID->"3701310d-7bed-48ed-ac07-b804fb306a04"
]
(* End of Notebook Content *)

(* Internal cache information *)
(*CellTagsOutline
CellTagsIndex->{}
*)
(*CellTagsIndex
CellTagsIndex->{}
*)
(*NotebookFileOutline
Notebook[{
Cell[557, 20, 463, 10, 62, "Input",ExpressionUUID->"18f9a11e-2a18-4284-857c-1c436db9b83e"],
Cell[CellGroupData[{
Cell[1045, 34, 17161, 332, 297, "Input",ExpressionUUID->"43459b01-55b7-4e0f-a0c1-1a8e24f5a5cd"],
Cell[18209, 368, 4115, 60, 62, "Message",ExpressionUUID->"aacaffdc-bd19-4b78-b236-d68c794c71a6"],
Cell[22327, 430, 4114, 60, 62, "Message",ExpressionUUID->"713110f9-6c40-4a38-9897-29410895121a"],
Cell[26444, 492, 3500, 52, 36, "Message",ExpressionUUID->"a36b8ec3-1691-4437-b95a-d2a531705a79"],
Cell[29947, 546, 3502, 52, 36, "Message",ExpressionUUID->"4f6ad4af-83bf-4299-87ef-9f9820b8f369"],
Cell[33452, 600, 3514, 52, 36, "Message",ExpressionUUID->"f53602aa-e4bc-494f-963e-5d199d5705fb"],
Cell[36969, 654, 3129, 46, 22, "Message",ExpressionUUID->"6a0a8634-7417-4e06-83bd-e61b5ee5cd27"],
Cell[40101, 702, 2843, 40, 24, "Output",ExpressionUUID->"2bb6faf7-6b7d-4f85-b3ed-d58b1d0e41c5"]
}, Open  ]],
Cell[42959, 745, 1117, 32, 48, "Input",ExpressionUUID->"b518cc96-639a-4446-ba6b-ef3c03604ebb"],
Cell[44079, 779, 342, 7, 48, "Input",ExpressionUUID->"98b7521f-eef3-49ad-b1e0-ff1730861371"],
Cell[CellGroupData[{
Cell[44446, 790, 1765, 39, 100, "Input",ExpressionUUID->"d0d78d5f-ef3b-4515-bab2-b39536258d5b"],
Cell[46214, 831, 12577, 337, 271, "Output",ExpressionUUID->"d89246a2-ed8c-4329-9e92-6b4f214637b6"],
Cell[58794, 1170, 5956, 133, 175, "Output",ExpressionUUID->"dbdecd08-701a-4feb-bf01-315c1414dbe8"],
Cell[64753, 1305, 1096, 16, 35, "Output",ExpressionUUID->"5815d544-980c-46c5-af2a-4df8bf1f94d4"],
Cell[65852, 1323, 380, 9, 22, "Message",ExpressionUUID->"54667d58-7ee2-414b-a356-e7a23c4c3fef"],
Cell[66235, 1334, 1191, 19, 24, "Output",ExpressionUUID->"6c963088-5671-49fa-a775-8a3fdf9304d0"]
}, Open  ]],
Cell[CellGroupData[{
Cell[67463, 1358, 407, 11, 47, "Input",ExpressionUUID->"9921f906-68e5-4300-b35e-c472cef55330"],
Cell[67873, 1371, 995, 19, 31, "Message",ExpressionUUID->"fba54687-8fa3-4d10-ab22-ac7019ed6476"],
Cell[68871, 1392, 177, 4, 18, "Print",ExpressionUUID->"3a686b4f-528c-4550-81f0-e7f5889c6923"],
Cell[69051, 1398, 995, 19, 31, "Message",ExpressionUUID->"865f1848-2894-46b4-bfc8-b4fe9ca6939d"],
Cell[70049, 1419, 220, 4, 18, "Print",ExpressionUUID->"f9aa16b4-ecd2-4328-9b79-48cb44be7e98"],
Cell[70272, 1425, 993, 19, 31, "Message",ExpressionUUID->"16ad7cef-3fc0-4e82-8d5e-43624fbde44d"],
Cell[71268, 1446, 461, 10, 22, "Message",ExpressionUUID->"a7fb6553-0aba-44ec-b72c-649f1d9541c0"]
}, Open  ]],
Cell[71744, 1459, 351, 8, 48, "Input",ExpressionUUID->"b76299e0-c396-40e2-b2f4-d9fca32c7cd6"],
Cell[72098, 1469, 2809, 80, 111, "Input",ExpressionUUID->"4eb4b7b0-6baf-474d-8b74-97f3b8be2d8f"],
Cell[74910, 1551, 239, 4, 33, "Input",ExpressionUUID->"6b9a5ad2-0c5a-4846-8789-b85d95890d2c"],
Cell[75152, 1557, 344, 10, 21, "Input",ExpressionUUID->"7aacf4e9-1420-4f75-9511-8283ff762f56"],
Cell[75499, 1569, 1040, 21, 105, "Input",ExpressionUUID->"c1cf43cf-6994-4b75-ad07-2780886971d9"],
Cell[76542, 1592, 245, 5, 33, "Input",ExpressionUUID->"cfd705f1-289b-4490-a707-3a28ee277b8e"],
Cell[CellGroupData[{
Cell[76812, 1601, 2234, 61, 67, "Input",ExpressionUUID->"64bb1687-2c61-4e11-ad3e-45cd431cdb66"],
Cell[CellGroupData[{
Cell[79071, 1666, 536, 12, 18, "Print",ExpressionUUID->"89d6da79-3f25-449e-b43e-b899adaeeb6b"],
Cell[79610, 1680, 516, 12, 18, "Print",ExpressionUUID->"102d256e-e7be-46c8-bdee-2f95bec85be4"]
}, Open  ]]
}, Open  ]],
Cell[80153, 1696, 778, 16, 33, "Input",ExpressionUUID->"3250ffc1-3446-45a6-a2bb-c9fd511bed0a"],
Cell[CellGroupData[{
Cell[80956, 1716, 2414, 58, 91, "Input",ExpressionUUID->"ceae716f-61da-42dd-b233-60165d7da522"],
Cell[CellGroupData[{
Cell[83395, 1778, 661, 14, 18, "Print",ExpressionUUID->"0dc699b7-95fb-4909-9b5d-cf27c8eb98d1"],
Cell[84059, 1794, 647, 13, 18, "Print",ExpressionUUID->"67d18a74-3cd0-47a1-b9df-26f84bdc4e3b"]
}, Open  ]]
}, Open  ]],
Cell[84733, 1811, 794, 16, 33, "Input",ExpressionUUID->"41df354e-15d1-48de-a8d9-0b8486b4b6fc"],
Cell[CellGroupData[{
Cell[85552, 1831, 3445, 97, 116, "Input",ExpressionUUID->"28abf26c-d8f0-42ea-9fae-724795685a4c"],
Cell[CellGroupData[{
Cell[89022, 1932, 513, 11, 18, "Print",ExpressionUUID->"666f277d-6568-4386-aec7-d4e57f04f25d"],
Cell[89538, 1945, 520, 11, 18, "Print",ExpressionUUID->"ab158285-81da-4157-bac4-187ef5f7cce5"]
}, Open  ]]
}, Open  ]],
Cell[90085, 1960, 414, 9, 62, "Input",ExpressionUUID->"cc5c92d8-a585-4d1c-baf2-2b931a032113"],
Cell[CellGroupData[{
Cell[90524, 1973, 24432, 451, 375, "Input",ExpressionUUID->"bcbf7486-8264-40ff-8a51-faef72e1559d"],
Cell[114959, 2426, 1624, 29, 33, "Print",ExpressionUUID->"cb836a7c-5dd9-4a3e-8342-df9e21f3eb47"],
Cell[116586, 2457, 10563, 150, 169, "Message",ExpressionUUID->"834e8aa0-c3ca-4061-bf7d-0192c6354dd0"],
Cell[127152, 2609, 1402, 24, 22, "Message",ExpressionUUID->"c3e67a2b-485c-4f18-83f9-f43b864aab90"],
Cell[128557, 2635, 1401, 24, 22, "Message",ExpressionUUID->"d50e8efd-6624-4859-be89-4f83e4752ec3"],
Cell[129961, 2661, 1397, 24, 22, "Message",ExpressionUUID->"c167f837-3283-4a8b-adce-143feba5bb0d"],
Cell[131361, 2687, 1349, 23, 22, "Message",ExpressionUUID->"101ce4e1-ccf3-4c63-9171-2b9368367239"],
Cell[132713, 2712, 1269, 22, 31, "Message",ExpressionUUID->"f64fa1e8-3ecb-4a7e-9305-69bfb2c18d7e"],
Cell[133985, 2736, 1303, 23, 22, "Message",ExpressionUUID->"15119591-da95-4a19-93af-e9b10c1faac9"],
Cell[135291, 2761, 1269, 22, 31, "Message",ExpressionUUID->"3fc30914-9d2a-4c0d-9777-1273004666d3"],
Cell[136563, 2785, 1265, 22, 31, "Message",ExpressionUUID->"ad8c5072-739c-4dbe-b5c1-997a760b23d5"],
Cell[137831, 2809, 1349, 23, 22, "Message",ExpressionUUID->"03f152b6-638a-4d0e-a505-6287a3d2a777"],
Cell[139183, 2834, 1300, 23, 22, "Message",ExpressionUUID->"98a1741f-a9a2-4d92-a920-1dd2b1ef89a3"],
Cell[140486, 2859, 1301, 23, 22, "Message",ExpressionUUID->"f32f2f87-387c-494d-96a5-9a96de3e0682"],
Cell[141790, 2884, 1352, 23, 22, "Message",ExpressionUUID->"dfbd259a-b131-4721-a033-99d9393907f3"],
Cell[143145, 2909, 1305, 23, 22, "Message",ExpressionUUID->"2df3cd3f-f5e3-4bca-bdaa-6249d180f48a"],
Cell[144453, 2934, 768, 18, 35, "Output",ExpressionUUID->"e8677d89-81e2-4329-8c1a-2239882c81d1"]
}, Open  ]],
Cell[CellGroupData[{
Cell[145258, 2957, 6182, 145, 236, "Input",ExpressionUUID->"3f8ed157-3ff1-4aac-b88c-0a3cf128e740"],
Cell[151443, 3104, 712, 11, 35, "Output",ExpressionUUID->"874f6b16-d18c-4ab9-b63f-5edf3de438cf"],
Cell[152158, 3117, 752, 11, 35, "Output",ExpressionUUID->"2ae9dde5-2de1-4afe-aac5-7c31487b4a50"],
Cell[152913, 3130, 752, 11, 35, "Output",ExpressionUUID->"0a5e0659-422f-4798-84cf-c37524a1af82"],
Cell[CellGroupData[{
Cell[153690, 3145, 179, 4, 18, "Print",ExpressionUUID->"a1b8d375-fa25-4d04-b01f-4cd1550a7f96"],
Cell[153872, 3151, 196, 4, 18, "Print",ExpressionUUID->"020d7269-25e7-4aef-9498-bbc69e502e97"],
Cell[154071, 3157, 196, 4, 18, "Print",ExpressionUUID->"ba04316a-4870-48e5-b063-75bcbb9e3f39"],
Cell[154270, 3163, 194, 4, 18, "Print",ExpressionUUID->"fb22b16c-f739-49de-81de-742712f70d20"],
Cell[154467, 3169, 193, 4, 18, "Print",ExpressionUUID->"4471f95e-df0c-4906-8996-777d084e74a4"],
Cell[154663, 3175, 194, 4, 18, "Print",ExpressionUUID->"0c222de5-7044-481c-8f54-1089052a78e8"],
Cell[154860, 3181, 195, 4, 18, "Print",ExpressionUUID->"b801a257-5c02-43a0-86b8-47008365e12d"],
Cell[155058, 3187, 196, 4, 18, "Print",ExpressionUUID->"2cae4cd6-37ea-4323-9046-4fc5a0db5540"],
Cell[155257, 3193, 194, 4, 18, "Print",ExpressionUUID->"57894bdc-cde2-44ed-9c8e-195ce25704a7"],
Cell[155454, 3199, 196, 4, 18, "Print",ExpressionUUID->"ca2424ba-2625-41cd-ad56-956e82847840"],
Cell[155653, 3205, 191, 4, 18, "Print",ExpressionUUID->"6f4f406c-3504-43a3-b859-6dcfdaa95c38"],
Cell[155847, 3211, 196, 4, 18, "Print",ExpressionUUID->"e55b49b0-57ac-4446-bfc0-b1e98bf4eb9a"],
Cell[156046, 3217, 196, 4, 18, "Print",ExpressionUUID->"bc9cf8c5-4493-4ee1-b609-2e4fb459c3fe"],
Cell[156245, 3223, 196, 4, 18, "Print",ExpressionUUID->"65b37eb7-9826-4786-8926-2d942dbdf197"],
Cell[156444, 3229, 193, 4, 18, "Print",ExpressionUUID->"f4257b9b-3a58-400e-936d-ebf257f480f9"],
Cell[156640, 3235, 194, 4, 18, "Print",ExpressionUUID->"2d983513-586b-4503-b220-7b1cf0b71b9b"],
Cell[156837, 3241, 193, 4, 18, "Print",ExpressionUUID->"da92b817-548b-490d-b9ab-7ac3cd861a8e"],
Cell[157033, 3247, 195, 4, 18, "Print",ExpressionUUID->"63fc64f6-5f9b-4128-9630-d2eca16fcadf"],
Cell[157231, 3253, 195, 4, 18, "Print",ExpressionUUID->"9c3acd14-a67e-4abb-978b-78171871809b"],
Cell[157429, 3259, 194, 4, 18, "Print",ExpressionUUID->"91e6b275-7083-4f17-8109-b7e2421d0219"],
Cell[157626, 3265, 195, 4, 18, "Print",ExpressionUUID->"0a7bdf16-4974-4e0d-adbb-a18737841e59"],
Cell[157824, 3271, 195, 4, 18, "Print",ExpressionUUID->"e1f0b68a-daa7-4804-ab03-1cd3272ce995"],
Cell[158022, 3277, 196, 4, 18, "Print",ExpressionUUID->"f5489c5d-f5c3-4840-9494-2ffaf0ed8bbf"],
Cell[158221, 3283, 195, 4, 18, "Print",ExpressionUUID->"97b414ad-1df2-423b-8c93-7a4350fbb615"],
Cell[158419, 3289, 193, 4, 18, "Print",ExpressionUUID->"1646d96b-7df6-47ec-8344-29eb023d48d2"],
Cell[158615, 3295, 196, 4, 18, "Print",ExpressionUUID->"ee7fb232-d9e4-4772-941f-ff1e9aa160af"],
Cell[158814, 3301, 195, 4, 18, "Print",ExpressionUUID->"e8587c82-5b7a-47a4-9ff4-edc92f697870"],
Cell[159012, 3307, 195, 4, 18, "Print",ExpressionUUID->"aef12b54-5c33-4617-8e9a-abe4de33a7af"],
Cell[159210, 3313, 194, 4, 18, "Print",ExpressionUUID->"1849403d-bd0b-4144-8e24-12ee3d051353"],
Cell[159407, 3319, 195, 4, 18, "Print",ExpressionUUID->"a91f1f01-667f-4ce5-98d1-9acd6db990a7"],
Cell[159605, 3325, 193, 4, 18, "Print",ExpressionUUID->"ab1ff617-6a23-42d2-bbf7-1c1ae86bc4a8"],
Cell[159801, 3331, 195, 4, 18, "Print",ExpressionUUID->"bbfca272-869c-4793-baae-355d3cc09912"],
Cell[159999, 3337, 193, 4, 18, "Print",ExpressionUUID->"8142b309-1f84-4b7b-a0e3-0ba9d5831be5"],
Cell[160195, 3343, 192, 4, 18, "Print",ExpressionUUID->"b147326c-0db2-436f-ae5e-487df955173b"],
Cell[160390, 3349, 193, 4, 18, "Print",ExpressionUUID->"362895c6-eb80-4ac6-806f-e10e77094e60"],
Cell[160586, 3355, 195, 4, 18, "Print",ExpressionUUID->"db5959b9-c740-4795-9a1b-309562126e76"],
Cell[160784, 3361, 193, 4, 18, "Print",ExpressionUUID->"6ab1100c-fcf5-4821-96d8-8e9ee0745ff7"],
Cell[160980, 3367, 193, 4, 18, "Print",ExpressionUUID->"8565da5a-d08c-4d49-99e9-81a629ac9cc6"],
Cell[161176, 3373, 195, 4, 18, "Print",ExpressionUUID->"b409996d-6b69-4f55-b276-1137b14b17b4"],
Cell[161374, 3379, 193, 4, 18, "Print",ExpressionUUID->"70722b36-4a34-4e8d-b285-b2309db3228b"],
Cell[161570, 3385, 193, 4, 18, "Print",ExpressionUUID->"4762701b-e439-4e26-b6a4-fba87916d84c"],
Cell[161766, 3391, 195, 4, 18, "Print",ExpressionUUID->"ca3f7e86-d70b-4b92-98d0-f2dd74b9bf85"],
Cell[161964, 3397, 193, 4, 18, "Print",ExpressionUUID->"89b59d0c-5de4-4bd8-8955-8ff53b165ccb"],
Cell[162160, 3403, 193, 4, 18, "Print",ExpressionUUID->"dff4debc-ddad-4dd5-bbda-1d81c95ef678"],
Cell[162356, 3409, 195, 4, 18, "Print",ExpressionUUID->"0880e3e9-97af-42b0-9669-a888576ab902"],
Cell[162554, 3415, 195, 4, 18, "Print",ExpressionUUID->"a0080de4-9158-4229-983a-341d43f67e2b"],
Cell[162752, 3421, 193, 4, 18, "Print",ExpressionUUID->"2d7e86a0-279c-4650-8cb3-fe068be4d355"],
Cell[162948, 3427, 195, 4, 18, "Print",ExpressionUUID->"fc27511f-84fb-4979-8ffe-aec9eb076e3a"],
Cell[163146, 3433, 193, 4, 18, "Print",ExpressionUUID->"b48b9ad1-82dd-4181-92f4-134715831b7c"],
Cell[163342, 3439, 195, 4, 18, "Print",ExpressionUUID->"9b411cbc-90fa-4998-bd8f-290083b4894d"],
Cell[163540, 3445, 193, 4, 18, "Print",ExpressionUUID->"e56effc5-725a-429d-8146-f65e73d23ea8"],
Cell[163736, 3451, 193, 4, 18, "Print",ExpressionUUID->"fc86d2db-fbb1-4f1a-95e6-b5d747ed146d"],
Cell[163932, 3457, 193, 4, 18, "Print",ExpressionUUID->"b421424b-c8c0-42e1-96b2-20cb73728551"],
Cell[164128, 3463, 191, 4, 18, "Print",ExpressionUUID->"8594068a-727c-477d-8ebc-294aa47006dc"],
Cell[164322, 3469, 195, 4, 18, "Print",ExpressionUUID->"7485be35-030a-4039-8944-cada45383d68"],
Cell[164520, 3475, 195, 4, 18, "Print",ExpressionUUID->"e0ea9843-97d6-4d8a-b6d3-9118a6020902"],
Cell[164718, 3481, 193, 4, 18, "Print",ExpressionUUID->"a53972f2-5b27-4b64-b0d3-3f73d9d82716"],
Cell[164914, 3487, 195, 4, 18, "Print",ExpressionUUID->"39e5370b-cc59-4c09-ba10-41aa2feb5874"],
Cell[165112, 3493, 195, 4, 18, "Print",ExpressionUUID->"dbd60b4b-3bcd-4b40-98aa-2b90d6f9e216"],
Cell[165310, 3499, 193, 4, 18, "Print",ExpressionUUID->"ac0d97f8-a721-483a-adeb-b7b932c15a03"],
Cell[165506, 3505, 195, 4, 18, "Print",ExpressionUUID->"de837232-13db-4be8-b6be-5f32bcaf16de"],
Cell[165704, 3511, 193, 4, 18, "Print",ExpressionUUID->"7f51396d-7754-444e-a2a6-0e8069078b6f"],
Cell[165900, 3517, 194, 4, 18, "Print",ExpressionUUID->"33c16395-9179-4071-b567-f4012e41e6c4"],
Cell[166097, 3523, 193, 4, 18, "Print",ExpressionUUID->"f4d305a4-29a6-43fc-8225-ea686cf99ff2"],
Cell[166293, 3529, 196, 4, 18, "Print",ExpressionUUID->"912f5e61-a356-47b3-911a-47d9580e856b"],
Cell[166492, 3535, 193, 4, 18, "Print",ExpressionUUID->"d0ee788c-79e1-4e08-92e7-b7f731172413"],
Cell[166688, 3541, 192, 4, 18, "Print",ExpressionUUID->"70f1daed-5e8d-4f05-83fb-071cba6ac5d2"],
Cell[166883, 3547, 196, 4, 18, "Print",ExpressionUUID->"54de0d84-8055-46e6-ae7e-a2029a841729"],
Cell[167082, 3553, 195, 4, 18, "Print",ExpressionUUID->"6cfa34d9-ebcb-4c7b-904e-4d1ac99ebc15"],
Cell[167280, 3559, 196, 4, 18, "Print",ExpressionUUID->"5300c21b-6260-482d-8066-1960ce8219d1"],
Cell[167479, 3565, 196, 4, 18, "Print",ExpressionUUID->"240cb349-605d-4b0f-94a8-c560393d820b"],
Cell[167678, 3571, 196, 4, 18, "Print",ExpressionUUID->"ed67f82b-3d74-4aba-815e-6876f262a1d7"],
Cell[167877, 3577, 194, 4, 18, "Print",ExpressionUUID->"79e8beba-5794-4e15-aa6a-aad94274e72d"],
Cell[168074, 3583, 193, 4, 18, "Print",ExpressionUUID->"e51fffc2-edab-4bb5-b958-33edfcc837aa"],
Cell[168270, 3589, 193, 4, 18, "Print",ExpressionUUID->"ba94079b-bf39-4f53-939e-31ed2c5dc062"],
Cell[168466, 3595, 194, 4, 18, "Print",ExpressionUUID->"b8c442c4-ec0e-465a-91f7-061f34e7d951"],
Cell[168663, 3601, 194, 4, 18, "Print",ExpressionUUID->"783e31ce-c421-4ba0-bc15-5eb4fb1ac875"],
Cell[168860, 3607, 193, 4, 18, "Print",ExpressionUUID->"fe8421a2-e49d-45ed-bb07-54e4608944e8"],
Cell[169056, 3613, 196, 4, 18, "Print",ExpressionUUID->"8392631d-67cd-44db-8b65-c94697697984"],
Cell[169255, 3619, 194, 4, 18, "Print",ExpressionUUID->"5cb8993d-614d-406b-a15e-02f1d90432d7"],
Cell[169452, 3625, 196, 4, 18, "Print",ExpressionUUID->"3b22c460-0213-464d-938c-8b6dcc433282"],
Cell[169651, 3631, 194, 4, 18, "Print",ExpressionUUID->"ff76e551-20e1-4f6b-bf12-93f8574c99c9"],
Cell[169848, 3637, 192, 4, 18, "Print",ExpressionUUID->"af3390d6-822c-46cd-8ac9-a1171c016878"],
Cell[170043, 3643, 194, 4, 18, "Print",ExpressionUUID->"c877c211-893d-4225-a9ca-2d2732430898"],
Cell[170240, 3649, 195, 4, 18, "Print",ExpressionUUID->"8107e2a9-1c21-467c-8359-bc12f646dacd"],
Cell[170438, 3655, 196, 4, 18, "Print",ExpressionUUID->"664a5493-d511-4171-958d-3f54c8eae89c"],
Cell[170637, 3661, 193, 4, 18, "Print",ExpressionUUID->"0d9c1567-ce8c-4578-bae3-64130b4635e3"],
Cell[170833, 3667, 193, 4, 18, "Print",ExpressionUUID->"5d06161e-a9fb-4719-92e1-dccafe92ce19"],
Cell[171029, 3673, 194, 4, 18, "Print",ExpressionUUID->"3e033786-8581-45f4-b2ed-476b3b363cf4"],
Cell[171226, 3679, 195, 4, 18, "Print",ExpressionUUID->"1534a945-ebf8-44de-bfe7-7a82b04528a1"],
Cell[171424, 3685, 196, 4, 18, "Print",ExpressionUUID->"94bd32d9-8139-41c7-9d5a-2bdce3d53860"],
Cell[171623, 3691, 195, 4, 18, "Print",ExpressionUUID->"49e41e2a-4fa2-442a-b166-142e7fe29ad6"],
Cell[171821, 3697, 193, 4, 18, "Print",ExpressionUUID->"35de657d-6a03-41cd-8abf-8cf56b63c3ab"],
Cell[172017, 3703, 194, 4, 18, "Print",ExpressionUUID->"1b90bba9-608c-4cfb-a5de-c212c07a21f1"],
Cell[172214, 3709, 192, 4, 18, "Print",ExpressionUUID->"5173eecd-6a65-4bcd-9036-431319732aff"],
Cell[172409, 3715, 196, 4, 18, "Print",ExpressionUUID->"4112c879-e02b-473f-866c-fcf42712c651"],
Cell[172608, 3721, 193, 4, 18, "Print",ExpressionUUID->"56d13f65-51af-4602-89a8-e718d4805f36"],
Cell[172804, 3727, 194, 4, 18, "Print",ExpressionUUID->"bd1a3d89-aa99-491f-81c2-21c8abe0dcad"],
Cell[173001, 3733, 196, 4, 18, "Print",ExpressionUUID->"4497eee9-19f8-488c-b02e-c54237280f6b"],
Cell[173200, 3739, 194, 4, 18, "Print",ExpressionUUID->"0a7cd6c0-f2b0-496b-b741-7b93287f4a2f"],
Cell[173397, 3745, 194, 4, 18, "Print",ExpressionUUID->"3f574e6d-ff33-4585-b880-6bde7c8b9075"]
}, Open  ]],
Cell[173606, 3752, 9142, 215, 164, "Output",ExpressionUUID->"85fc3612-768f-4239-91b0-700f4205962f"],
Cell[182751, 3969, 5566, 127, 193, "Output",ExpressionUUID->"befb92e4-f17e-4e46-a69b-6bf09d8c9b2e"]
}, Open  ]],
Cell[CellGroupData[{
Cell[188354, 4101, 2627, 79, 190, "Input",ExpressionUUID->"f3e3aa5e-80f8-426a-8e73-253ba1578f0c"],
Cell[190984, 4182, 245, 4, 35, "Output",ExpressionUUID->"68a5e072-102a-485f-8131-88fff3904cad"],
Cell[191232, 4188, 5065, 120, 190, "Output",ExpressionUUID->"37dc04f9-b83a-4bfe-9637-1d1dd5599e77"]
}, Open  ]],
Cell[196312, 4311, 351, 8, 48, "Input",ExpressionUUID->"7d36c13f-c600-443e-8d42-4998a9c86b8f"],
Cell[196666, 4321, 367, 10, 32, "Input",ExpressionUUID->"9bfbb48c-4d6b-4c8e-8416-d918f22bc7d0"],
Cell[197036, 4333, 491, 11, 62, "Input",ExpressionUUID->"68a3778d-d2d4-4e8d-9e12-cbf01d07ff82"],
Cell[197530, 4346, 1121, 32, 162, "Input",ExpressionUUID->"ce6bc35d-fb6b-4f98-ac0e-5b43ec22abfe"],
Cell[CellGroupData[{
Cell[198676, 4382, 886, 28, 76, "Input",ExpressionUUID->"e35824b0-523e-46d8-8e57-4b9cf6553235"],
Cell[199565, 4412, 332, 10, 41, "Output",ExpressionUUID->"14afccf1-623a-4084-a620-fa9d9de8300d"]
}, Open  ]],
Cell[CellGroupData[{
Cell[199934, 4427, 864, 19, 64, "Input",ExpressionUUID->"027b031e-66cd-44ab-9354-2b5f43305f5b"],
Cell[200801, 4448, 650, 14, 41, "Output",ExpressionUUID->"633c1297-b269-48ea-9e3a-0b75f84906fa"]
}, Open  ]],
Cell[201466, 4465, 555, 14, 64, "Input",ExpressionUUID->"7de0f221-483f-475a-aa0c-c356c561aadf"],
Cell[202024, 4481, 533, 17, 49, "Input",ExpressionUUID->"2adc81d2-d51d-49dc-8e35-0dcd56225cc1"],
Cell[202560, 4500, 154, 3, 21, "Input",ExpressionUUID->"dc192912-b160-41bc-bd85-fe1712fb3093"]
}
]
*)
